# Supplementary material for: Catalytic regeneration of metal-hydrides from their corresponding metal-alkoxides via the hydroboration of carbonates to obtain methanol and diols
Source: Royal Society of Chemistry journal article supplement (doi:10.1039/d3sc01700a), 2023-01-01
Supplement: d3sc01700a1.pdf [file d3sc01700a1.pdf]

## Supporting information

# Catalytic Regeneration of Metal-Hydrides From Their Corresponding Metal-Alkoxides via The Hydroboration of Carbonates to Obtain Methanol and Diols.

Hemanta Deka,<sup>a,b§</sup> Ida Ritacco,<sup>c§</sup> Natalia Fridman,<sup>a</sup> Lucia Caporaso,<sup>c\*</sup> and Moris S. Eisen.<sup>a\*</sup>

<sup>a</sup> Schulich Faculty of Chemistry, Technion – Israel Institute of Technology, Technion City, 3200008, Israel.

<sup>b</sup> Department of Chemistry, Goalpara College, Goalpara, 783101, Assam, India

<sup>c</sup> Dipartimento di Chimica e Biologia "Adolfo Zambelli", Università degli Studi di Salerno - Via Giovanni Paolo II, 132 - 84084 Fisciano, Salerno, Italy.

§ Contributed equally

*KEYWORDS* actinides, carbonates, hydroboration, reduction, HBpin, thorium-hemiacetal

E-mail: chmoris@tx.technion.ac.il

Fax: + 972-4-8295703; Tel: + 972-4-8292680

## Table of Contents

|                                                                                                                          |      |
|--------------------------------------------------------------------------------------------------------------------------|------|
| Table S1: Crystallographic table of <b>Th-2</b> , <b>Th-3</b> and <b>Th-4</b> .....                                      | S2   |
| Figure S1- Figure S9 <sup>1</sup> H and <sup>13</sup> C NMR of complexes <b>Th-2</b> , <b>Th-3</b> and <b>Th-4</b> ..... | S3   |
| Table S2: List of substrate and products .....                                                                           | S9   |
| Typical NMR-scale reaction procedure for the catalytic hydroboration of carbonates .....                                 | S10  |
| Spectroscopic data of the carbonate hydroboration products .....                                                         | S10  |
| Figure S10- Figure S50. <sup>1</sup> H and <sup>13</sup> C NMR of hydroborated products in the reaction mixture .....    | S16  |
| Kinetic experiments .....                                                                                                | S36  |
| Figure S51- Figure S58. Kinetic measurements.....                                                                        | S37  |
| Activation parameters .....                                                                                              | S42  |
| Kinetic isotope Effect .....                                                                                             | S45  |
| Stoichiometric reactions and controlled experiments.....                                                                 | S46  |
| Activation alternative mechanism.....                                                                                    | S54  |
| Deactivation mechanism.....                                                                                              | S55  |
| Catalytic cycle.....                                                                                                     | S56  |
| XYZ coordinates.....                                                                                                     | S58  |
| Reference.....                                                                                                           | S122 |

1. **Table 1: Crystallographic data for complexes Th-2, Th-3 and Th-4.**

|                                       | Th-2                                                              | Th-3                                                              | Th-4                                                                                                     |
|---------------------------------------|-------------------------------------------------------------------|-------------------------------------------------------------------|----------------------------------------------------------------------------------------------------------|
| Formulae                              | C <sub>39</sub> H <sub>80</sub> N <sub>6</sub> Si <sub>6</sub> Th | C <sub>40</sub> H <sub>82</sub> N <sub>6</sub> Si <sub>6</sub> Th | C <sub>41</sub> H <sub>84</sub> N <sub>6</sub> Si <sub>6</sub> Th · 0.5(C <sub>6</sub> H <sub>14</sub> ) |
| Molecular weight                      | 1033.67                                                           | 1047.70                                                           | 1104.81                                                                                                  |
| Crystal system                        | Monoclinic                                                        | Monoclinic                                                        | Monoclinic                                                                                               |
| Space group                           | P21/c                                                             | P21/c                                                             | P21/c                                                                                                    |
| Temperature/K                         | 200                                                               | 200                                                               | 200                                                                                                      |
| Wavelength                            | 0.71073                                                           | 0.71073                                                           | 0.71073                                                                                                  |
| a/Å                                   | 21.6196(19)                                                       | 20.597(11)                                                        | 20.8858(18)                                                                                              |
| b/Å                                   | 12.2443(10)                                                       | 12.447(8)                                                         | 12.2278(11)                                                                                              |
| c/Å                                   | 19.8455(16)                                                       | 21.000(11)                                                        | 24.084(2)                                                                                                |
| α/°                                   | 90                                                                | 90                                                                | 90                                                                                                       |
| β/°                                   | 99.296(3)                                                         | 98.366(15)                                                        | 112.951(2)                                                                                               |
| γ/°                                   | 90                                                                | 90                                                                | 90                                                                                                       |
| V/ Å <sup>3</sup>                     | 5184.4(8)                                                         | 5327(5)                                                           | 5663.9(9)                                                                                                |
| Z                                     | 4                                                                 | 4                                                                 | 4                                                                                                        |
| Density/gcm <sup>-1</sup>             | 1.324                                                             | 1.306                                                             | 1.296                                                                                                    |
| Absorption Coefficient                | 3.046                                                             | 2.965                                                             | 2.792                                                                                                    |
| Absorption Correction                 | Multi-scan                                                        | Multi-scan                                                        | Multi-scan                                                                                               |
| F(000)                                | 2120                                                              | 2152                                                              | 2284                                                                                                     |
| Total no of reflections               | 9269                                                              | 9401                                                              | 10035                                                                                                    |
| Reflections, <i>I</i> >2σ( <i>I</i> ) | 6797                                                              | 5819                                                              | 6030                                                                                                     |
| Max. 2θ/°                             | 25.173                                                            | 25.308                                                            | 25.107                                                                                                   |
| Complete to 2θ(%)                     | 99.6                                                              | 97.0                                                              | 99.0                                                                                                     |
| Refinement method                     | Full-matrix least-squares on <i>F</i> <sup>2</sup>                | Full-matrix least-squares on <i>F</i> <sup>2</sup>                | Full-matrix least-squares on <i>F</i> <sup>2</sup>                                                       |
| Goof ( <i>F</i> <sup>2</sup> )        | 0.971                                                             | 0.869                                                             | 0.981                                                                                                    |
| R indices [ <i>I</i> >2σ( <i>I</i> )] | 0.0304                                                            | 0.0406                                                            | 0.0482                                                                                                   |
| R Indices (all data)                  | 0.0578                                                            | 0.0872                                                            | 0.1136                                                                                                   |
| wR2                                   | 0.0500                                                            | 0.0898                                                            | 0.0805                                                                                                   |

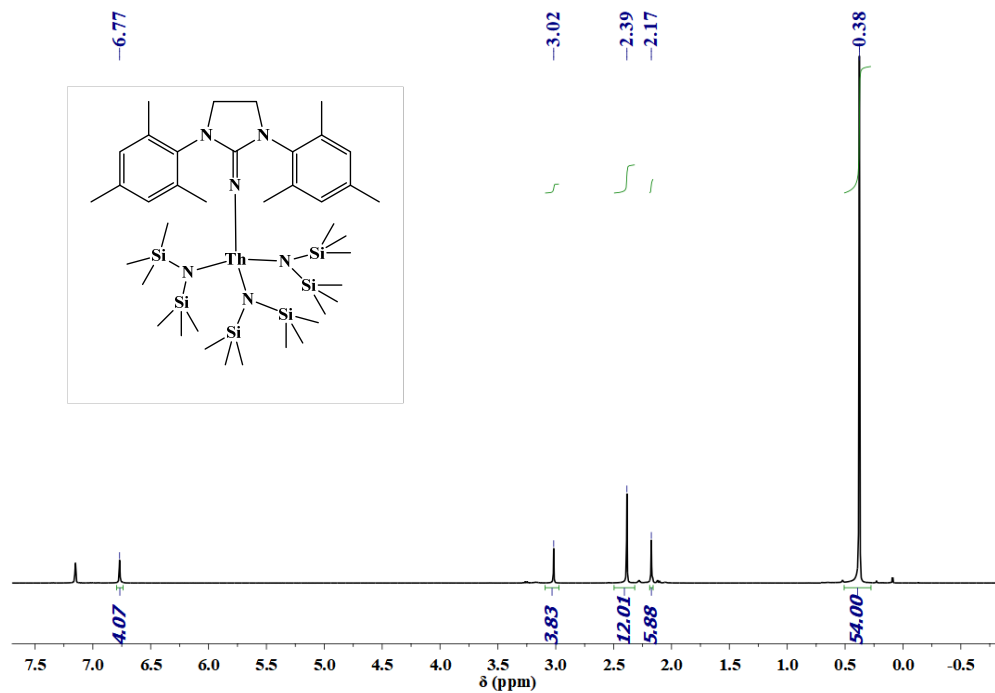

Figure S1.  $^{13}\text{C}$  NMR spectrum of Th-2 in  $\text{C}_6\text{D}_6$ .

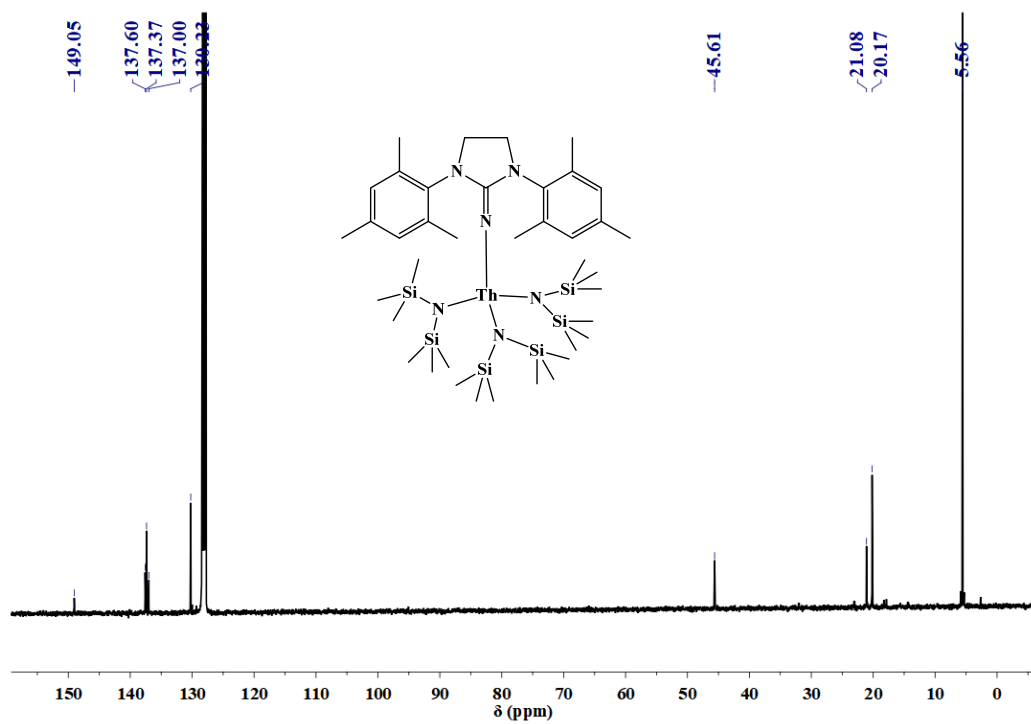

Figure S2.  $^{13}\text{C}$  NMR spectrum of Th-2 in  $\text{C}_6\text{D}_6$ .

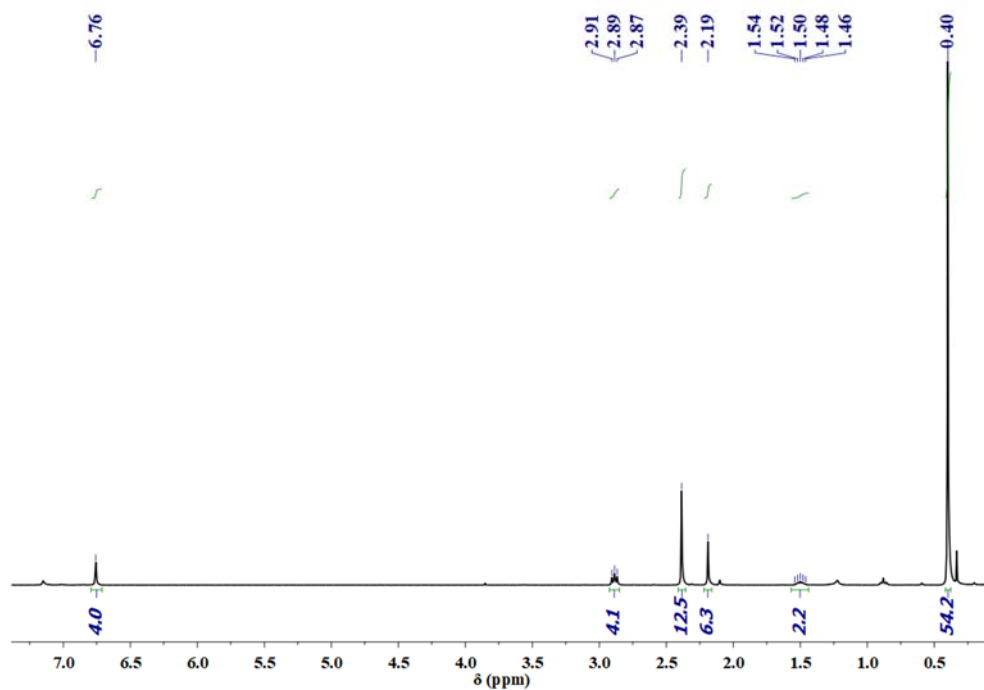

Figure S3.  $^1\text{H}$  NMR spectrum of **Th-3** in  $\text{C}_6\text{D}_6$ .

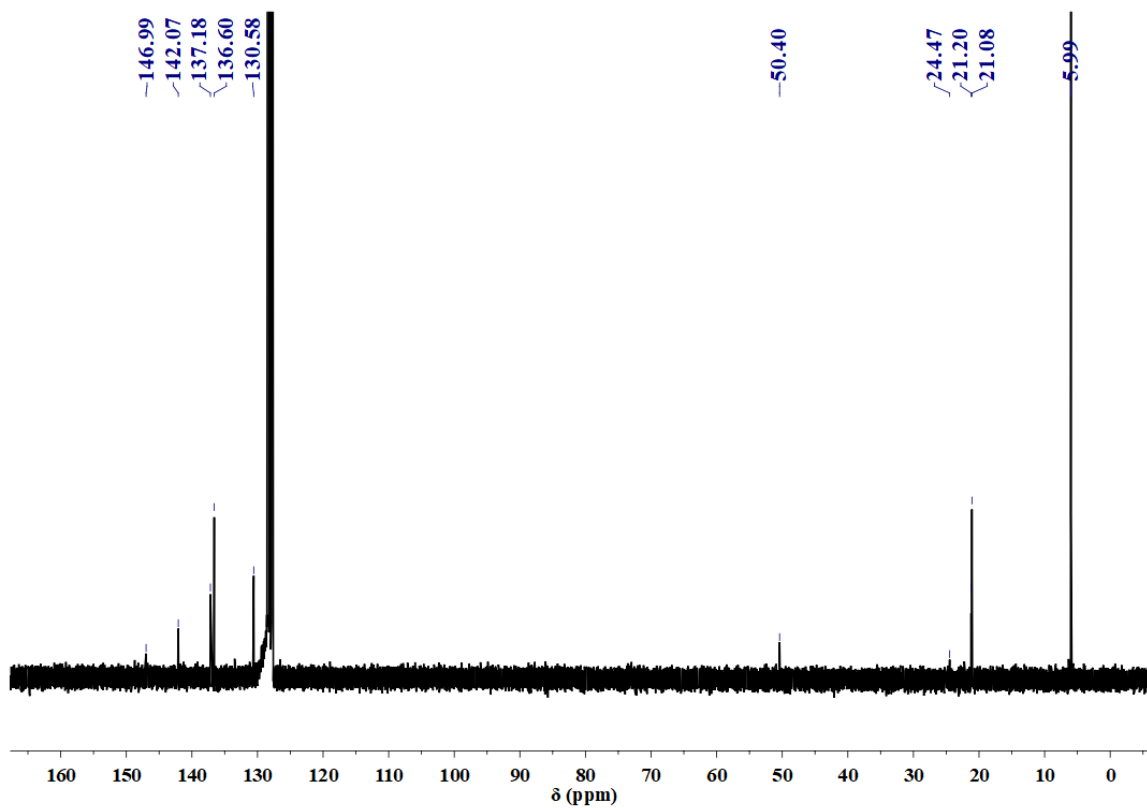

Figure S4.  $^{13}\text{C}$  NMR spectrum of **Th-3** in  $\text{C}_6\text{D}_6$ .

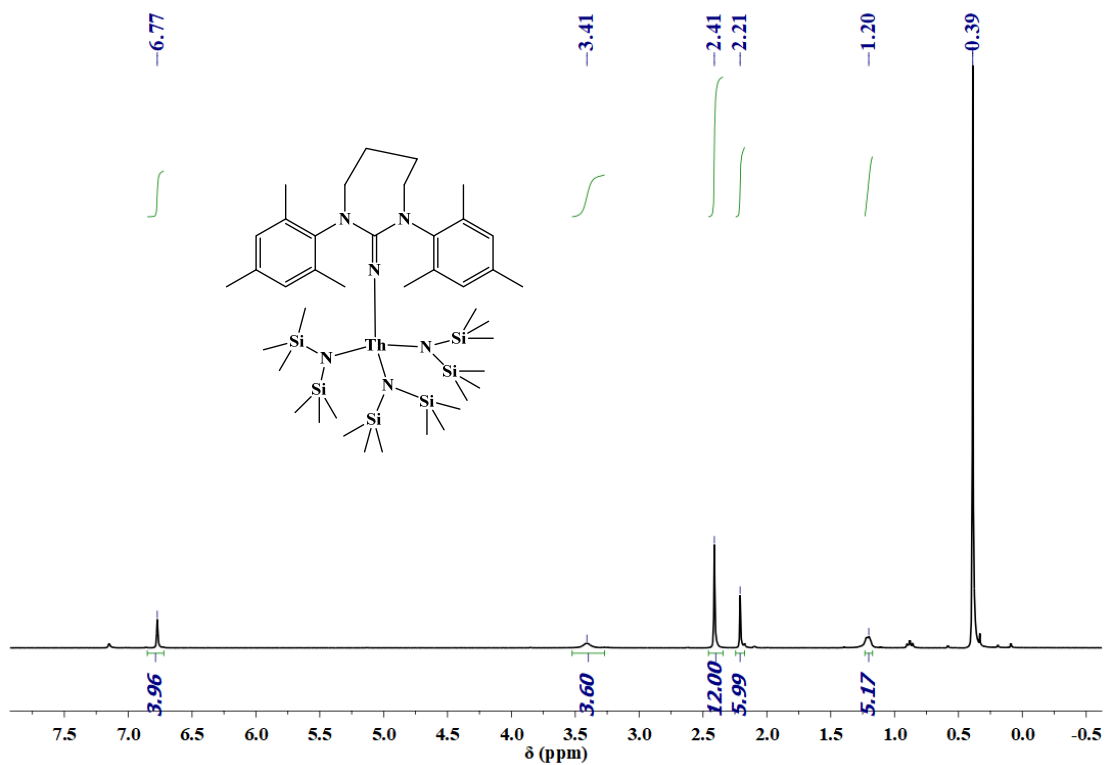

Figure S5.  $^1\text{H}$  NMR spectrum of Th-4 in  $\text{C}_6\text{D}_6$ .

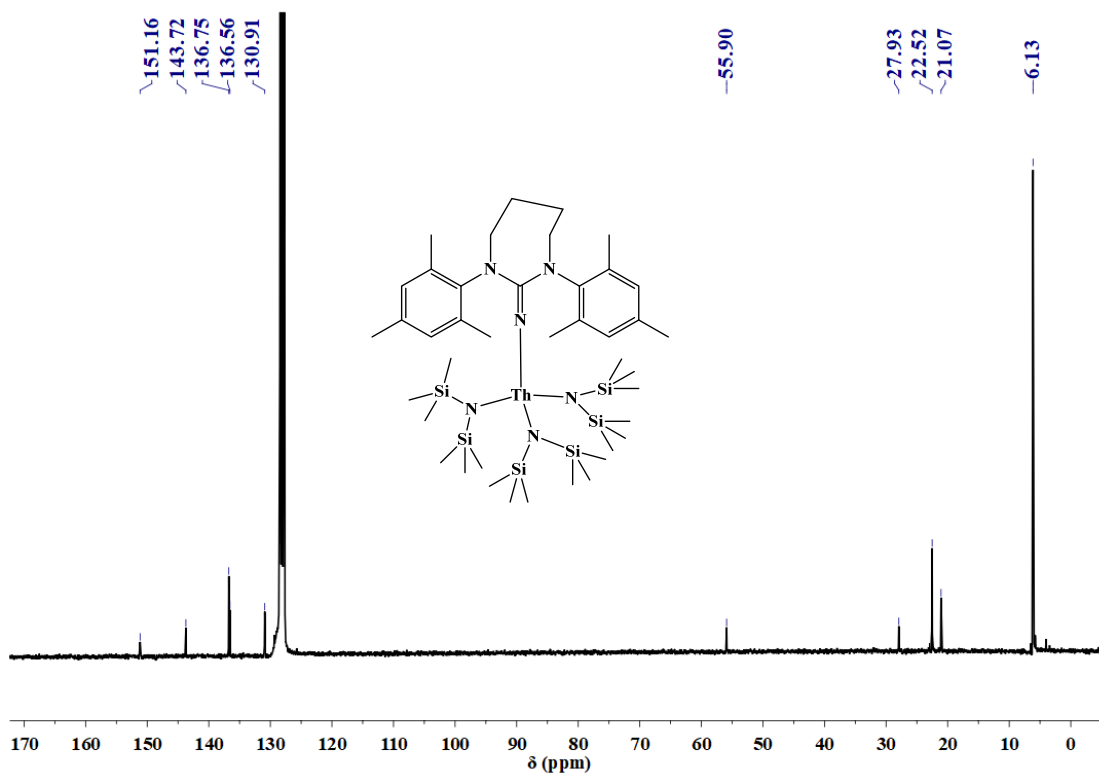

Figure S6.  $^{13}\text{C}$  NMR spectrum of Th-4 in  $\text{C}_6\text{D}_6$ .

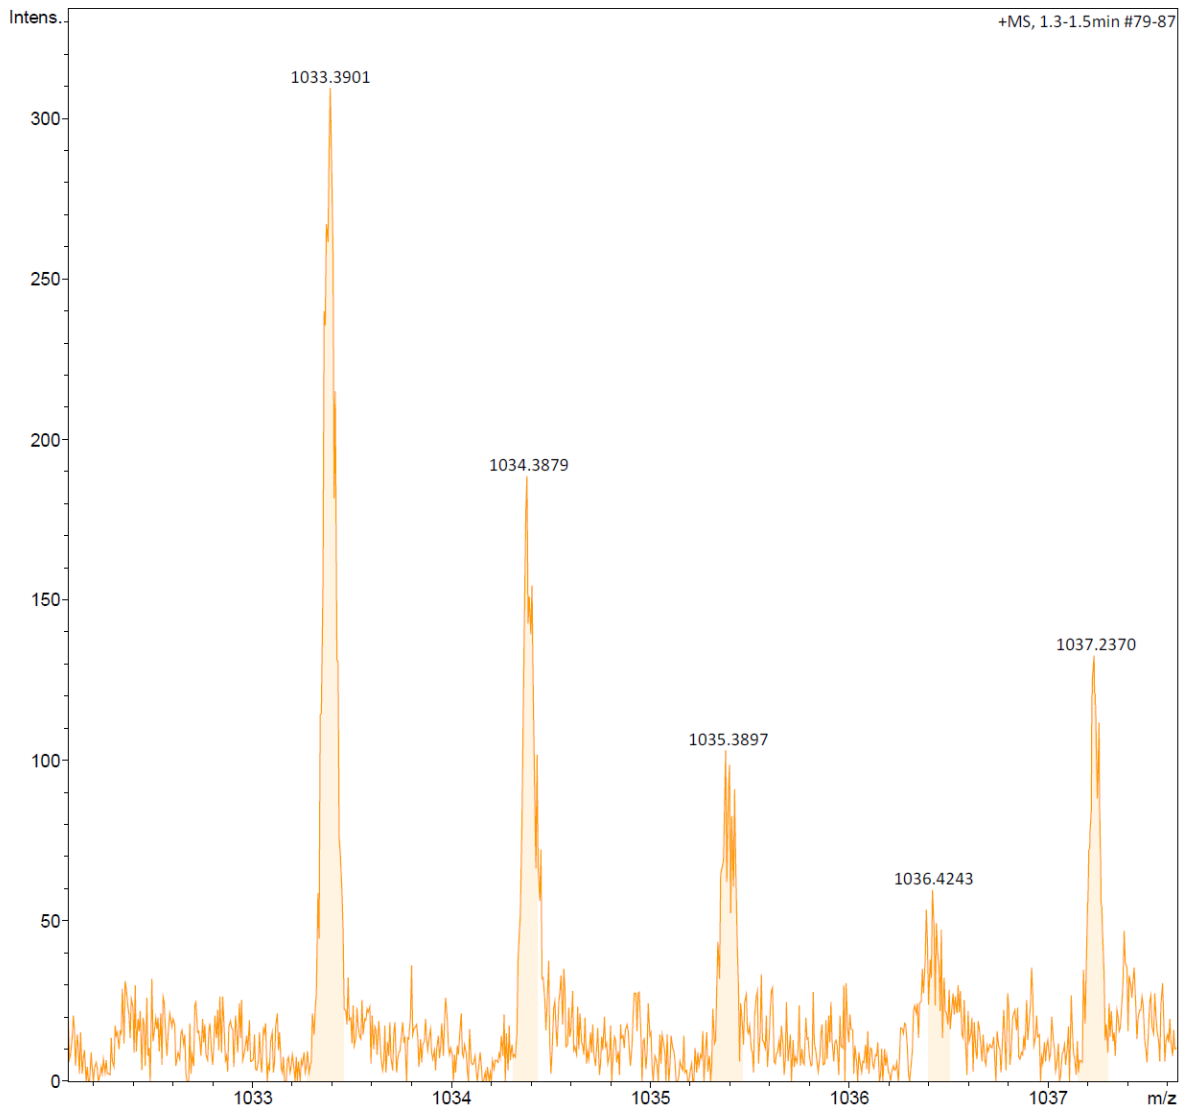

**Figure S7.** APCI mass spectrum of **Th-2**.

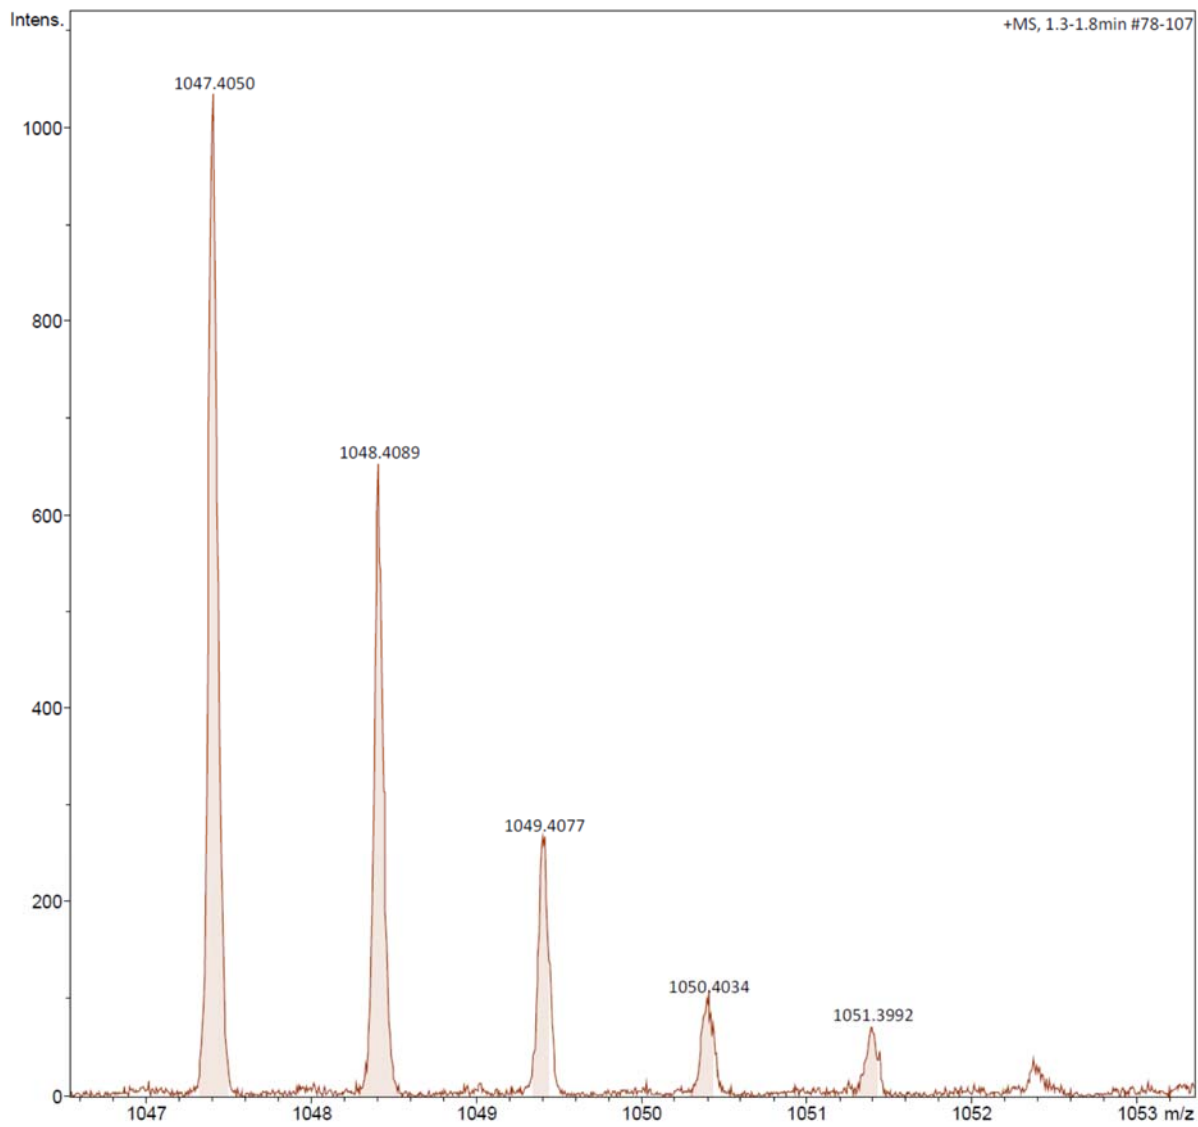

**Figure S8.** APCI mass spectrum of **Th-3**.

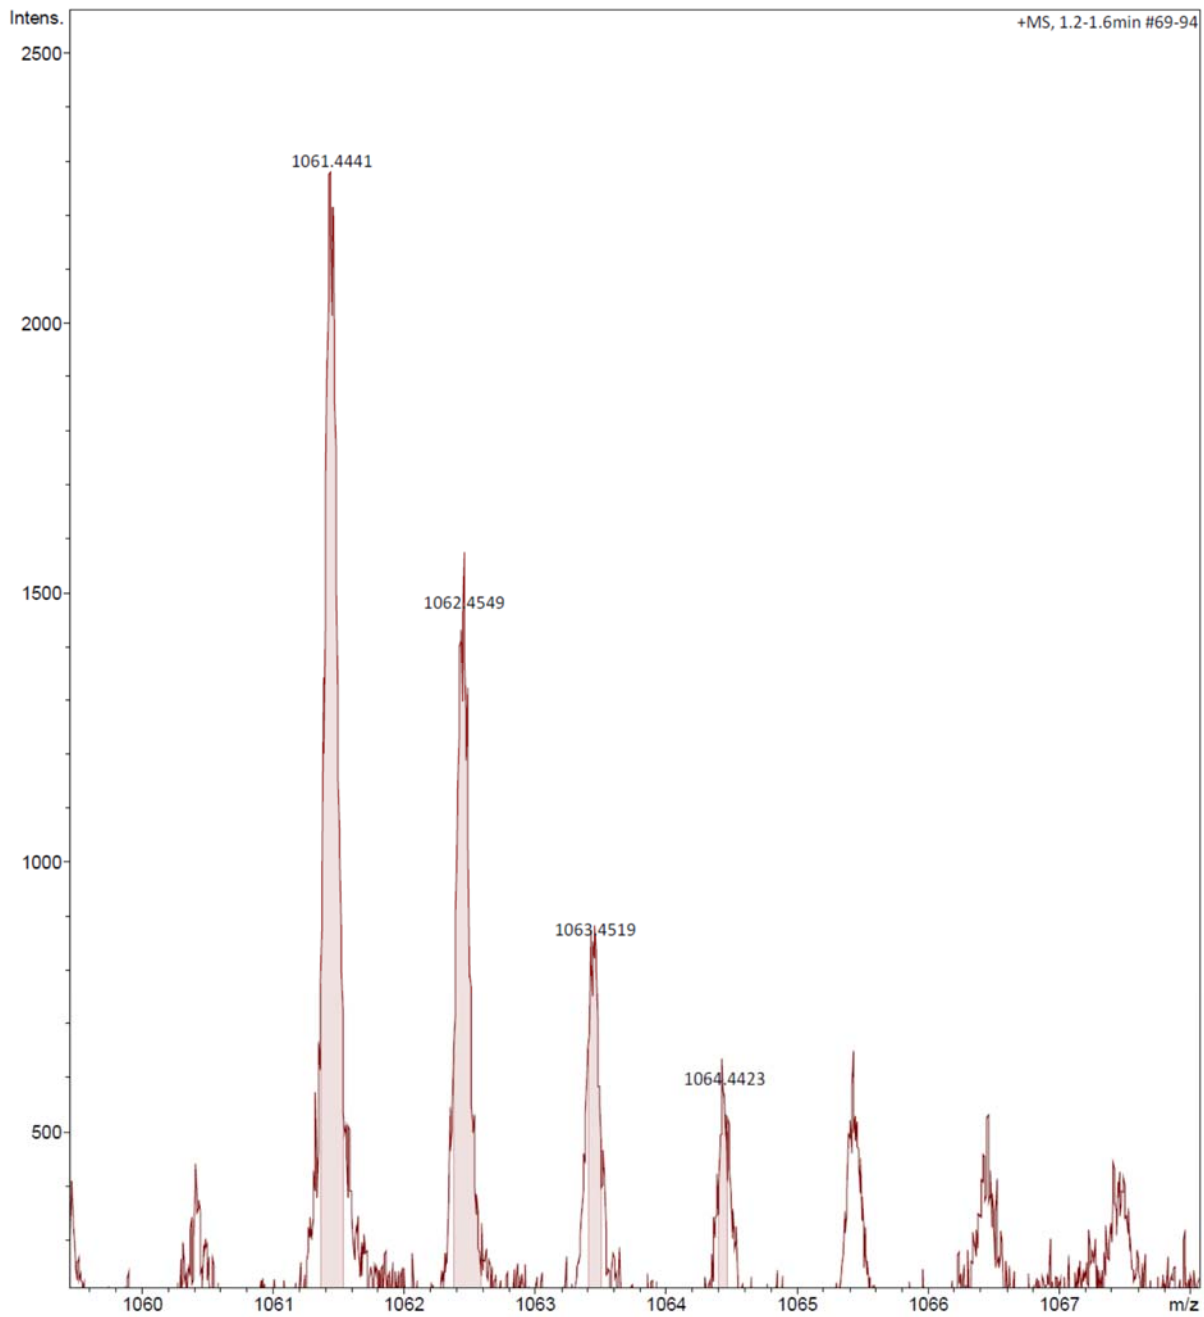

Figure S9. APCI mass spectrum of Th-4.



2. Table S2: List of substrates and products.<sup>a</sup>

| Entry          | Carbonate                                                                           | Product                                                                             | Time(h) | Yield <sup>b</sup> |
|----------------|-------------------------------------------------------------------------------------|-------------------------------------------------------------------------------------|---------|--------------------|
| 1              |    |    | 1       | 99                 |
| 2              |    |    | 1       | 99                 |
| 3 <sup>b</sup> |    |    | 1       | 99                 |
| 4              |    |    | 1       | 99                 |
| 5              |    |    | 1       | 99                 |
| 6              |    |    | 1       | 99                 |
| 7              |   |   | 1       | 99                 |
| 8              |  |  | 1       | 99                 |
| 9              |  |  | 5       | 99                 |
| 10             |  |  | 5       | 99                 |
| 11             |  |  | 12      | 99                 |
| 12             |  |  | 12      | 99                 |
| 13             |  |  | 1       | 99                 |
| 14             |  |  | 24      | 99                 |
| 15             |  |  | 24      | 50                 |
| 16             |  |  | 24      | Trace              |

|    |                                                                                   |                                                                                    |    |    |
|----|-----------------------------------------------------------------------------------|------------------------------------------------------------------------------------|----|----|
| 17 | 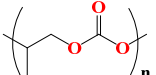 |   | 48 | 99 |
| 18 |  |  | 48 | 99 |
| 19 | CO <sub>2</sub>                                                                   |   | 48 | 76 |

<sup>a</sup>Reaction condition: Carbonate (0.1 mmol), HBpin (0.33 mmol), and precatalyst **Th-4** (0.001 mmol, 1mol%) at 80 °C in C<sub>6</sub>D<sub>6</sub> (0.6 mL); yields were determined by <sup>1</sup>H NMR spectroscopy of the crude reaction mixture. Corresponding hydroboration products are shown in Table S2. <sup>b</sup>4 mmol of HBpin was used.

### 3. Typical NMR-scale reaction procedure for the catalytic hydroboration of carbonates.

In a typical experiment, into a J. Young Teflon sealed NMR tube was added organic carbonate (0.1 mmol, 1equiv) and HBpin (0.44 mmol, 4.2equiv), followed by adding desired amount of catalyst (0.1-1μmol) in C<sub>6</sub>D<sub>6</sub>. The reaction was diluted to 550 μL with C<sub>6</sub>D<sub>6</sub> and sealed, and placed in an oil bath preheated to 80 °C. The crude reactions mixtures were analyzed using <sup>1</sup>H NMR, <sup>13</sup>C NMR, <sup>11</sup>B NMR the values of known compounds were compared to previous literature. The yield was calculated from the ratio of Carbonate and product from the crude <sup>1</sup>H NMR spectra.

### 4. Spectroscopic data of the carbonate hydroboration products:

#### 4.1 Hydroboration of ethylene carbonate [1a]

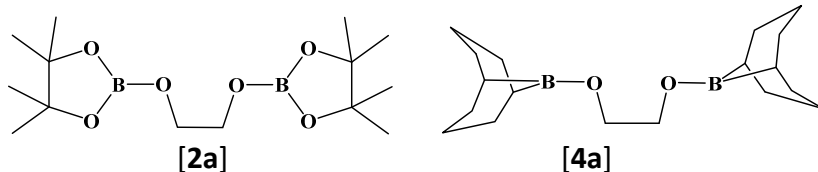

**2a** <sup>1</sup>H NMR (300 MHz, C<sub>6</sub>D<sub>6</sub>): (δ ppm) 3.94 (*s*, 4H), 1.08 (*s*, 24H). <sup>13</sup>C{<sup>1</sup>H} NMR (100 MHz, C<sub>6</sub>D<sub>6</sub>): (δ ppm) 82.6, 65.5, 24.7. Spectroscopic data agrees with those previously reported.<sup>1</sup>

**4a** <sup>1</sup>H NMR (300 MHz, C<sub>6</sub>D<sub>6</sub>): (δ ppm) 3.90 (*s*, 4H), 1.93-1.79 (*m*, 20H, merges with MeOBBN), 1.42-1.31 (*m*, 8H, merges with MeOBBN). <sup>13</sup>C{<sup>1</sup>H} NMR (100 MHz, C<sub>6</sub>D<sub>6</sub>): (δ ppm) 66.4, 33.8, 33.6, 33.5, 23.7. Spectroscopic data agree with those previously reported.<sup>1</sup>

#### 4.2 Hydroboration of diethyl carbonate [1b]

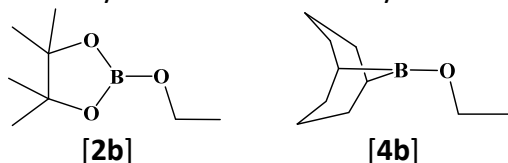

2a)  $^1\text{H}$  NMR (300 MHz,  $\text{C}_6\text{D}_6$ ): ( $\delta$  ppm) 3.89 (*q*,  $J = 8.0$  Hz, 2H), 1.10 (*t*,  $J = 8.0$  Hz, 3H), 1.05 (*s*, 12H).  $^{13}\text{C}\{^1\text{H}\}$  NMR (100 MHz,  $\text{C}_6\text{D}_6$ ): ( $\delta$  ppm) 82.4, 60.7, 24.7, 17.5. Spectroscopic data agree with those previously reported.<sup>1</sup>

1b)  $^1\text{H}$  NMR (300 MHz,  $\text{C}_6\text{D}_6$ ): ( $\delta$  ppm) 3.79 (*q*,  $J = 6.8$  Hz, 2H), 1.92-1.82 (*m*, 10H, merges with MeOBBN), 1.38-1.34 (*m*, 4H, merges with MeOBBN) 1.09 (*t*,  $J = 6.8$  Hz, 3H).  $^{13}\text{C}\{^1\text{H}\}$  NMR (100 MHz,  $\text{C}_6\text{D}_6$ ): ( $\delta$  ppm) 61.4, 33.6, 33.5, 24.3, 23.7, 17.9.  $^{11}\text{B}\{^1\text{H}\}$  NMR (133 MHz,  $\text{C}_6\text{D}_6$ ): ( $\delta$  ppm) 56.4. Spectroscopic data is in agreement with those previously reported.<sup>1</sup>

#### 4.3 Hydroboration of propylene carbonate [1c].

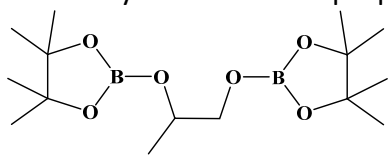

[2c]

$^1\text{H}$  NMR (300 MHz,  $\text{C}_6\text{D}_6$ ): ( $\delta$  ppm) 4.50 – 4.44 (*m*, 1H), 3.84 – 3.80 (*m*, 2H), 1.10 (*s*, 6H), 1.08 (*s*, 18H), 1.06 – 1.04 (*m*, 3H).  $^{13}\text{C}\{^1\text{H}\}$  NMR (100 MHz,  $\text{C}_6\text{D}_6$ ): ( $\delta$  ppm) 82.6, 82.4, 70.7, 69.6, 24.8, 24.8, 24.7, 18.6. Spectroscopic data agrees with those previously reported.<sup>1</sup>

#### 4.4 Hydroboration of 4-(chloromethyl)-1,3-dioxolan-2-one [1d].

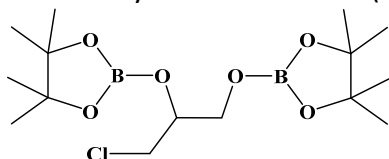

[2d]

$^1\text{H}$  NMR (300 MHz,  $\text{C}_6\text{D}_6$ ): ( $\delta$  ppm) 4.48 – 4.43 (*m*, 1H), 4.02 – 3.89 (*m*, 2H), 3.34-2.28 (*m*, 2H), 1.07, 1.06 (*s*, 24H).  $^{13}\text{C}\{^1\text{H}\}$  NMR (100 MHz,  $\text{C}_6\text{D}_6$ ): ( $\delta$  ppm) 82.9, 82.8, 74.3, 65.7, 44.7, 24.7, 24.7, 24.7, 24.6. Mass(*m/z*, +ESI) Calculated: 362.18 Found: 363.17

#### 4.5 Hydroboration of 4-(hydroxymethyl)-1,3-dioxolan-2-one [1e].

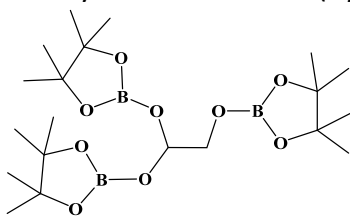

[2e]

$^1\text{H}$  NMR (300 MHz,  $\text{C}_6\text{D}_6$ ): ( $\delta$  ppm) 4.62-4.57 (*m*, 1H), 4.10-3.99 (*m*, 4H), 1.10 (*s*, 12H), 1.05 (*s*, 24H).  $^{13}\text{C}\{^1\text{H}\}$  NMR (100 MHz,  $\text{C}_6\text{D}_6$ ): ( $\delta$  ppm) 82.6, 82.6, 74.5, 65.6, 24.7, 24.7. Spectroscopic data is in agreement with those previously reported.<sup>1</sup>

#### 4.6 Hydroboration of styrene carbonate [1f].

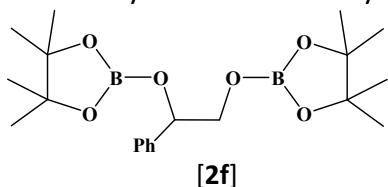

$^1\text{H}$  NMR (300 MHz,  $\text{C}_6\text{D}_6$ ): ( $\delta$  ppm) 7.34 (*d*,  $J = 6$  Hz, 2H), 7.07 – 7.00 (*m*, 3H), 5.53 (*m*, 1H), 4.16 – 4.05 (*m*, 2H), 1.10 (*s*, 6H), 1.09 (*s*, 6H), 1.08 (*s*, 6H), 1.05 (*s*, 6H).  $^{13}\text{C}\{^1\text{H}\}$  NMR (100 MHz,  $\text{C}_6\text{D}_6$ ): ( $\delta$  ppm) 140.1, 128.5, 126.7, 82.8, 82.7, 77.0, 70.2, 24.8, 24.8, 24.6. Spectroscopic data is in agreement with those previously reported.<sup>1</sup>

#### 4.7 Hydroboration of hexahydro-1,3-benzodioxol-2-one [1g].

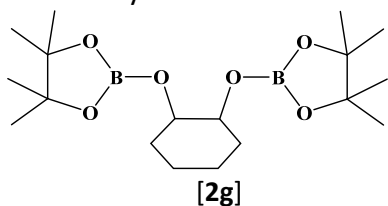

$^1\text{H}$  NMR (300 MHz,  $\text{C}_6\text{D}_6$ ): ( $\delta$  ppm) 4.41 (*d*,  $J = 8$  Hz, 2H), 1.95 – 1.88 (*m*, 2H), 1.59 – 1.53 (*m*, 2H), 1.42 – 1.37 (*m*, 2H), 1.16 (*s*, 12H), 1.12 (*s*, 12H).  $^{13}\text{C}\{^1\text{H}\}$  NMR (100 MHz,  $\text{C}_6\text{D}_6$ ): ( $\delta$  ppm) 82.4, 73.5, 29.9, 24.9, 24.7, 21.9. Spectroscopic data is in agreement with those previously reported.<sup>1</sup>

#### 4.8 Hydroboration of 4-vinyl-1,3-dioxolan-2-one [1h].

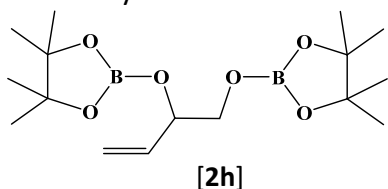

$^1\text{H}$  NMR (300 MHz,  $\text{C}_6\text{D}_6$ ): ( $\delta$  ppm) 5.78 – 5.67 (*m*, 1H), 5.36 – 5.30 (*m*, 1H), 4.98 – 4.90 (*m*, 2H), 3.91 (*d*,  $J = 6.0$  Hz, 2H), 1.10 (*s*, 6H), 1.08 (*s*, 12H), 1.07 (*s*, 6H).  $^{13}\text{C}\{^1\text{H}\}$  NMR (100 MHz,  $\text{C}_6\text{D}_6$ ): ( $\delta$  ppm) 136.0, 116.3, 82.7, 82.7, 75.5, 68.4, 25.1, 24.8, 24.7. Spectroscopic data agrees with those previously reported.<sup>1</sup>

#### 4.9 Hydroboration of trimethylene carbonate [1i].

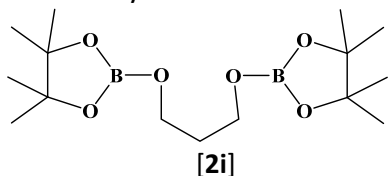

$^1\text{H}$  NMR (300 MHz,  $\text{C}_6\text{D}_6$ ): ( $\delta$  ppm) 3.98 (*t*,  $J = 6$  Hz, 4H), 1.76 (*p*,  $J = 6$  Hz, 2H), 1.04 (*s*, 24H).  $^{13}\text{C}\{^1\text{H}\}$  NMR (100 MHz,  $\text{C}_6\text{D}_6$ ): ( $\delta$  ppm) 82.4, 61.8, 33.9, 24.7. Spectroscopic data is in agreement with those previously reported.<sup>1</sup>

**4.10** Hydroboration of dimethyl carbonate [1j].

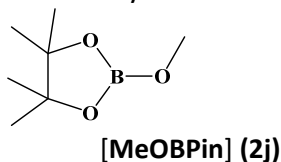

$^1\text{H}$  NMR (300 MHz,  $\text{C}_6\text{D}_6$ ): ( $\delta$  ppm) 3.50 (*s*, 3H), 1.04 (*s*, 12H).  $^{13}\text{C}\{^1\text{H}\}$  NMR (100 MHz,  $\text{C}_6\text{D}_6$ ): ( $\delta$  ppm) 82.5, 24.7. Spectroscopic data is in agreement with those previously reported.<sup>1</sup>

**4.11** Hydroboration of dipropyl carbonate [1k].

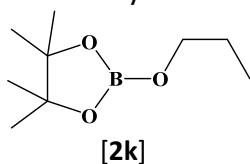

$^1\text{H}$  NMR (300 MHz,  $\text{C}_6\text{D}_6$ ): ( $\delta$  ppm) 3.84 (*t*,  $J = 6.6$  Hz, 2H), 1.53-1.46 (*m*, 2H) 1.06 (*s*, 12H), 0.81 (*t*,  $J = 6.0$  Hz, 3H).  $^{13}\text{C}\{^1\text{H}\}$  NMR (100 MHz,  $\text{C}_6\text{D}_6$ ): ( $\delta$  ppm) 82.4, 66.6, 25.21, 24.7, 10.3. Spectroscopic data agrees with those previously reported.<sup>1</sup>

**4.12** Hydroboration of dibutyl carbonate [1l].

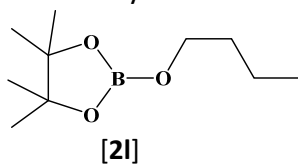

$^1\text{H}$  NMR (300 MHz,  $\text{C}_6\text{D}_6$ ): ( $\delta$  ppm) 3.90 (*t*,  $J = 6$  Hz, 2H), 1.52-1.45 (*m*, 2H), 1.34-1.25 (*m*, 2H) 1.06 (*s*, 12H), 0.81 (*t*,  $J = 6.0$  Hz, 3H).  $^{13}\text{C}\{^1\text{H}\}$  NMR (100 MHz,  $\text{C}_6\text{D}_6$ ): ( $\delta$  ppm) 82.4, 64.8, 34.0 24.7, 19.2 13.9. Spectroscopic data is in agreement with those previously reported.<sup>1</sup>

**4.13** Hydroboration of dibenzyl carbonate [1m].

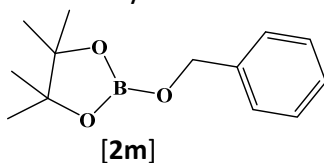

$^1\text{H}$  NMR (300 MHz,  $\text{C}_6\text{D}_6$ ): ( $\delta$  ppm) 7.31 (*d*,  $J = 6$  Hz, 2H), 7.15 – 7.11 (*m*, 2H), 7.07-7.04 (*m*, 1H), 4.95 (*s*, 2H), 1.03 (*s*, 12H).  $^{13}\text{C}\{^1\text{H}\}$  NMR (100 MHz,  $\text{C}_6\text{D}_6$ ): ( $\delta$  ppm) 140.1, 128.6, 127.6, 127.0, 82.7, 66.9, 24.7. Spectroscopic data agrees with those previously reported.<sup>1</sup>

**4.14** Hydroboration of diallyl carbonate [1n].

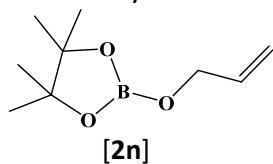

$^1\text{H}$  NMR (300 MHz,  $\text{C}_6\text{D}_6$ ): ( $\delta$  ppm) 5.86 – 5.76 (*m*, 1H), 5.32-5.27 (*m*, 1H), 5.00-4.97 (*m*, 1H), 4.38-4.36 (*m*, 2H), 1.04 (*s*, 12H).  $^{13}\text{C}\{^1\text{H}\}$  NMR (100 MHz,  $\text{C}_6\text{D}_6$ ): ( $\delta$  ppm) 136.2, 114.7, 82.6, 65.7 127.0, 82.7, 66.9, 24.7. Spectroscopic data agrees with those previously reported.<sup>1</sup>

**4.15** Hydroboration of ethyl methyl carbonate [1o].

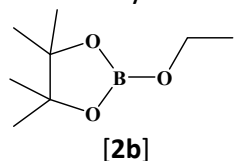

$^1\text{H}$  NMR (300 MHz,  $\text{C}_6\text{D}_6$ ): ( $\delta$  ppm) 3.89 (*q*,  $J = 8.0$  Hz, 2H), 1.10 (*t*,  $J = 8.0$  Hz, 3H), 1.05 (*s*, 12H).  $^{13}\text{C}\{^1\text{H}\}$  NMR (100 MHz,  $\text{C}_6\text{D}_6$ ): ( $\delta$  ppm) 82.4, 60.7, 24.7, 17.5. Spectroscopic data agrees with those previously reported.<sup>1</sup>

**4.16** Hydroboration of diphenyl carbonate [1p].

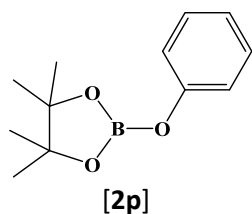

$^1\text{H}$  NMR (300 MHz,  $\text{C}_6\text{D}_6$ ): ( $\delta$  ppm) 7.18 – 7.16 (*m*, 2H), 7.09 – 7.05 (*m*, 2H), 6.87 – 6.83 (*m*, 1H), 1.05 (*s*, 12H).  $^{13}\text{C}\{^1\text{H}\}$  NMR (100 MHz,  $\text{C}_6\text{D}_6$ ): ( $\delta$  ppm) 154.3, 129.6, 123.3, 120.0, 83.3, 24.61. Spectroscopic data is in agreement with those previously reported.<sup>1</sup>

**4.17** Hydroboration of bis(2-methoxyphenyl) carbonate [1q].

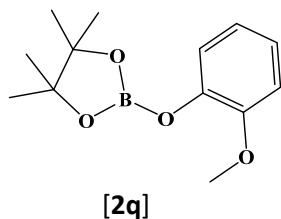

$^1\text{H}$  NMR (300 MHz,  $\text{C}_6\text{D}_6$ ): ( $\delta$  ppm) 7.15 – 7.13 (*dd*,  $J = 7.8$  Hz,  $J = 1.6$  Hz, 1H), 6.84 – 6.80 (*td*,  $J = 7.8$  Hz,  $J = 1.6$  Hz, 1H), 6.73 – 6.69 (*td*,  $J = 7.8$  Hz,  $J = 1.6$  Hz, 1H), 6.57 – 6.55 (*dd*,  $J = 7.8$  Hz,  $J = 1.6$

Hz, 1H), 3.35 (s, 3H), 1.07 (s, 12H).  $^{13}\text{C}\{^1\text{H}\}$  NMR (100 MHz,  $\text{C}_6\text{D}_6$ ): ( $\delta$  ppm) 151.0, 144.1, 123.9, 121.1, 121.1 112.6, 83.2, 55.3, 24.6. Spectroscopic data is in agreement with those previously reported.<sup>1</sup>

#### 4.18 Hydroboration of poly(propylene carbonate) [1s].

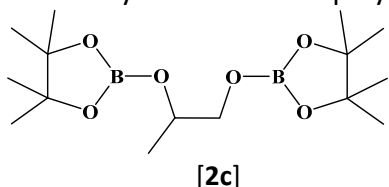

$^1\text{H}$  NMR (300 MHz,  $\text{C}_6\text{D}_6$ ): ( $\delta$  ppm) 4.50 – 4.44 (*m*, 1H), 3.84 – 3.80 (*m*, 2H), 1.10 (*s*, 6H), 1.08 (*s*, 18H), 1.06 – 1.04 (*m*, 3H).  $^{13}\text{C}\{^1\text{H}\}$  NMR (100 MHz,  $\text{C}_6\text{D}_6$ ): ( $\delta$  ppm) 82.6, 82.4, 70.7, 69.6, 24.8, 24.8, 24.7, 18.6. Spectroscopic data agrees with those previously reported.<sup>1</sup>

#### 4.19 Hydroboration of poly(bisphenol-A carbonate) [1t].

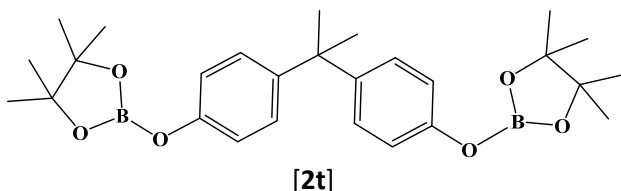

$^1\text{H}$  NMR (300 MHz,  $\text{C}_6\text{D}_6$ ): ( $\delta$  ppm) 7.12 – 7.10 (*d*,  $J = 6\text{Hz}$ , 4H), 6.99 – 6.97 (*d*,  $J = 6\text{ Hz}$ , 4H), 1.42 (*s*, 6H), 1.03 (*s*, 24H).  $^{13}\text{C}\{^1\text{H}\}$  NMR (100 MHz,  $\text{C}_6\text{D}_6$ ): ( $\delta$  ppm) 154.3, 129.6, 123.3, 120.0, 83.3, 24.61.

#### 4.20 Hydroboration of carbon dioxide [1u].

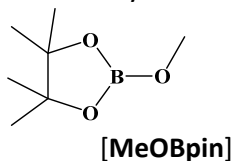

$^1\text{H}$  NMR (300 MHz,  $\text{C}_6\text{D}_6$ ): ( $\delta$  ppm) 3.50 (*s*, 3H), 1.04 (*s*, 12H).  $^{13}\text{C}\{^1\text{H}\}$  NMR (100 MHz,  $\text{C}_6\text{D}_6$ ): ( $\delta$  ppm) 82.5, 24.7. Spectroscopic data agrees with those previously reported.<sup>1,2</sup>

# <sup>1</sup>H & <sup>13</sup>C NMR spectra of hydroborated products in the reaction mixtures

# - Peaks for residual HBpin    \*- Peaks of MeOBpin

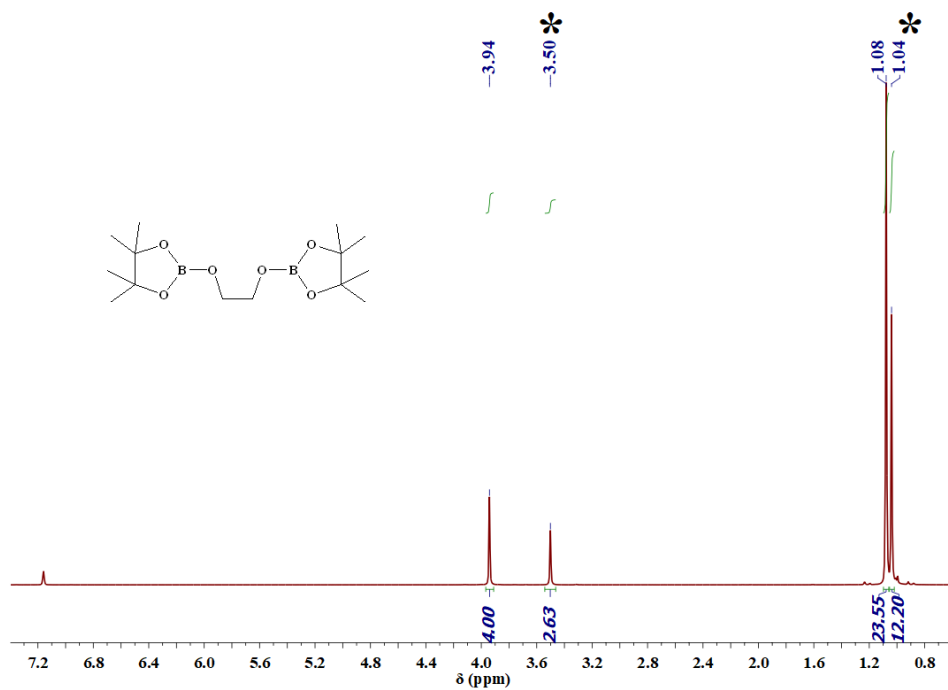

Figure S10. <sup>1</sup>H NMR spectrum of **2a** in reaction mixture.

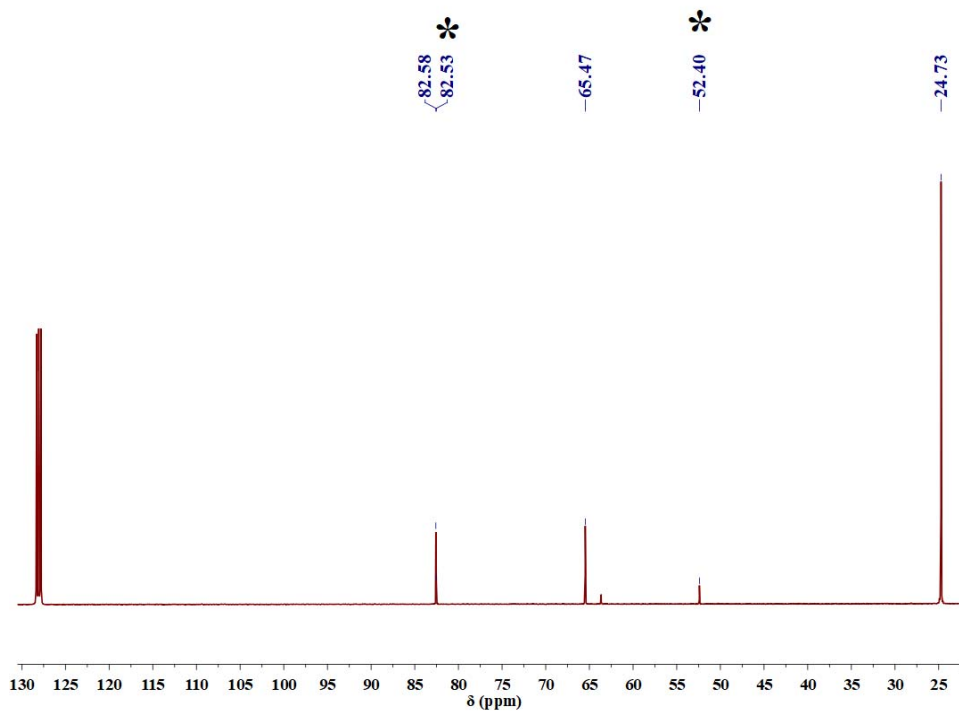

Figure S11. <sup>13</sup>C NMR spectrum of **2a** in reaction mixture.



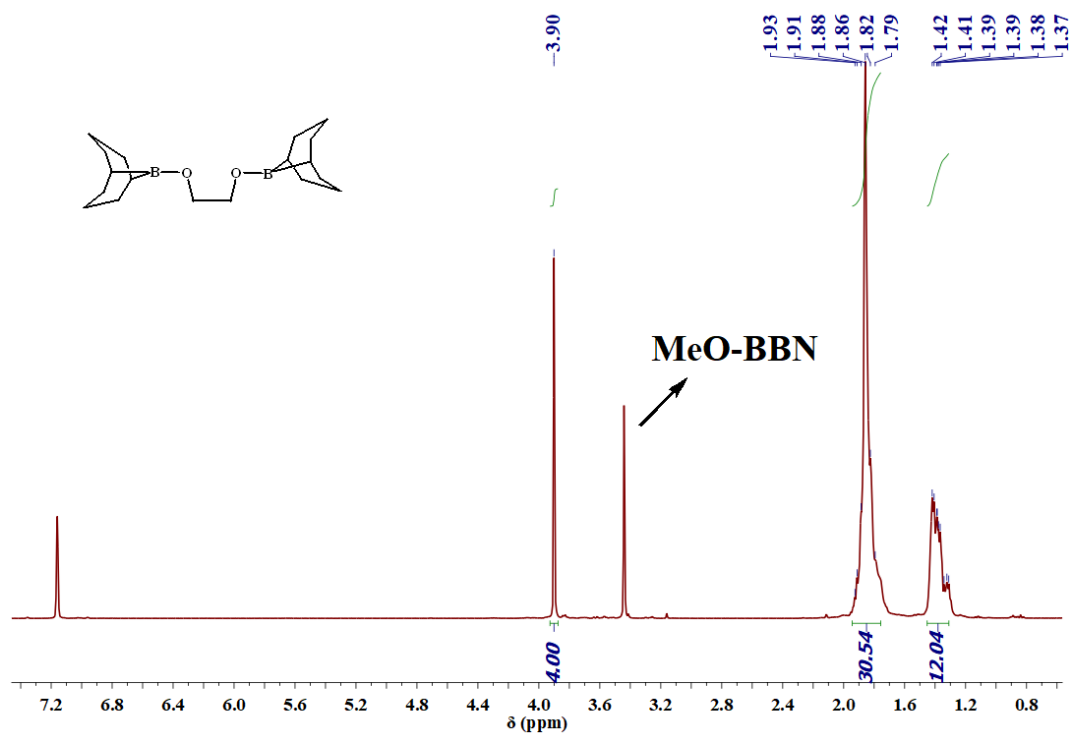

Figure S12.  $^1\text{H}$  NMR spectrum of **3a** in reaction mixture.

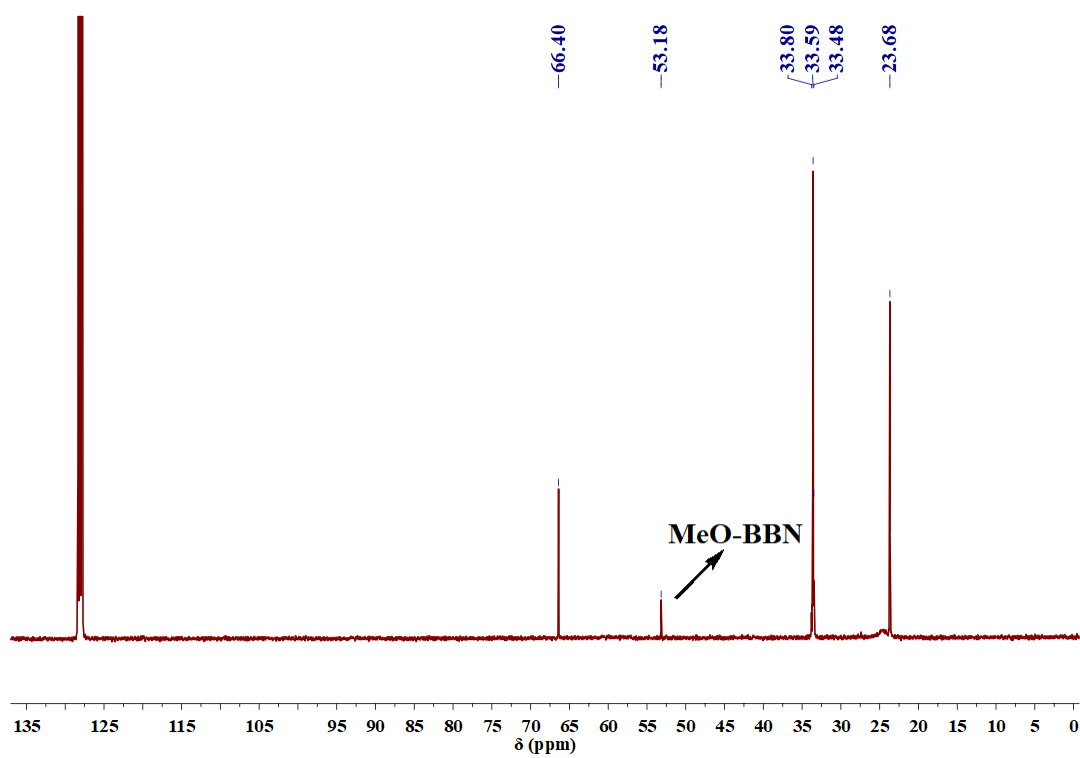

Figure S13.  $^{13}\text{C}$  NMR spectrum of **3a** in reaction mixture.

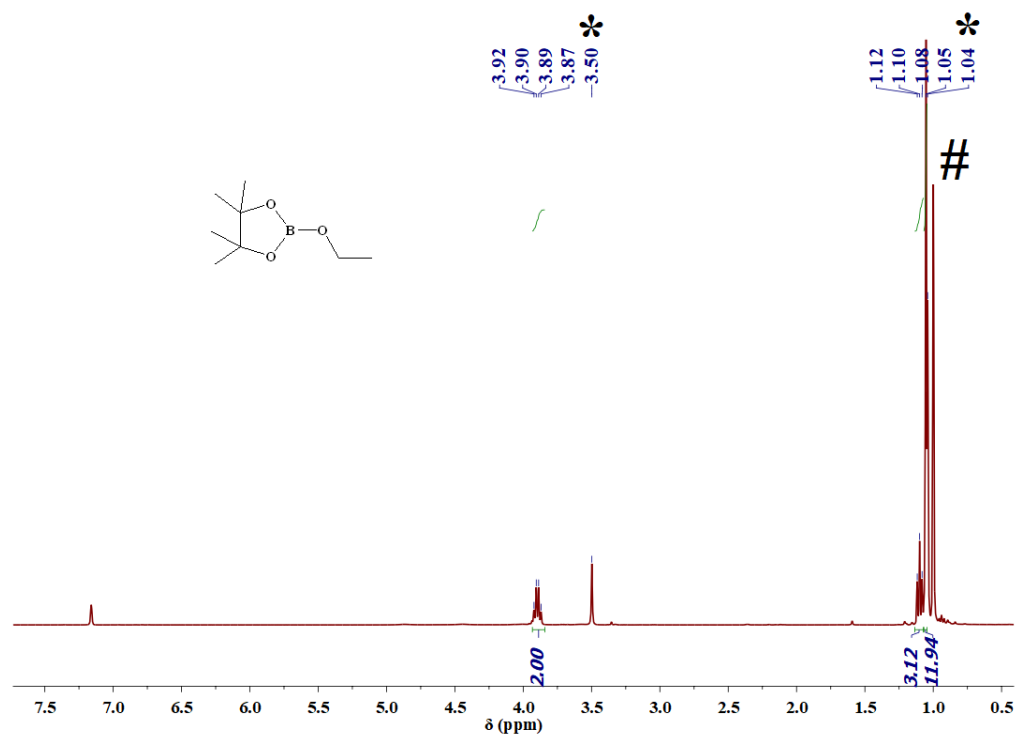

Figure S14. <sup>1</sup>H NMR spectrum of **2b** in reaction mixture.

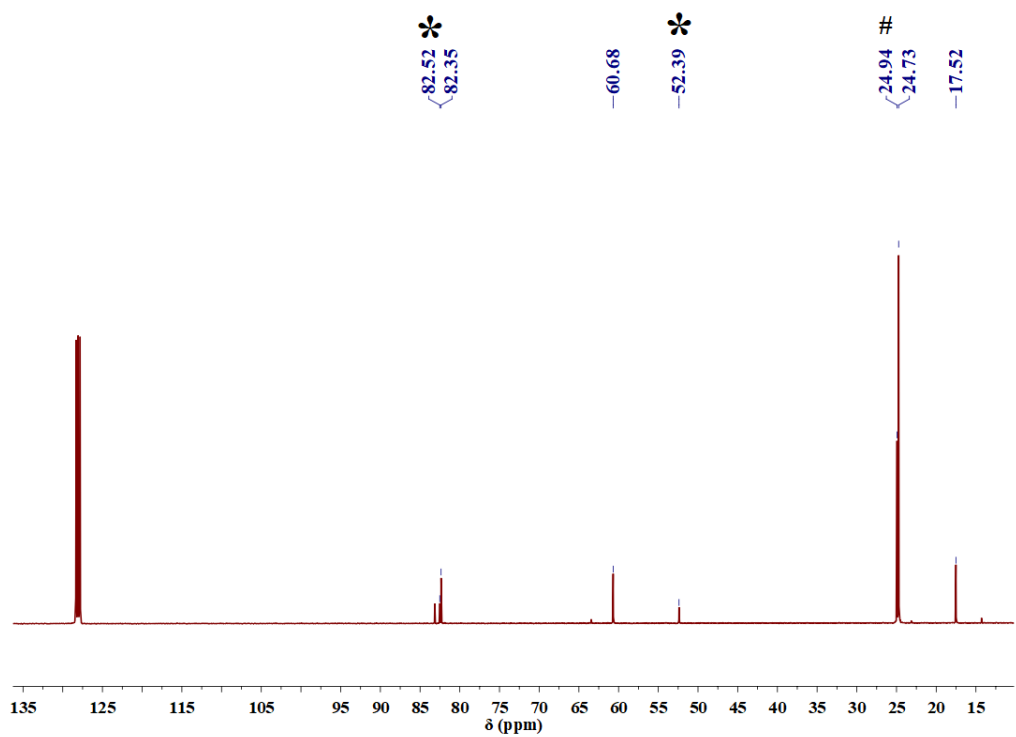

Figure S15. <sup>13</sup>C NMR spectrum of **2b** in reaction mixture.

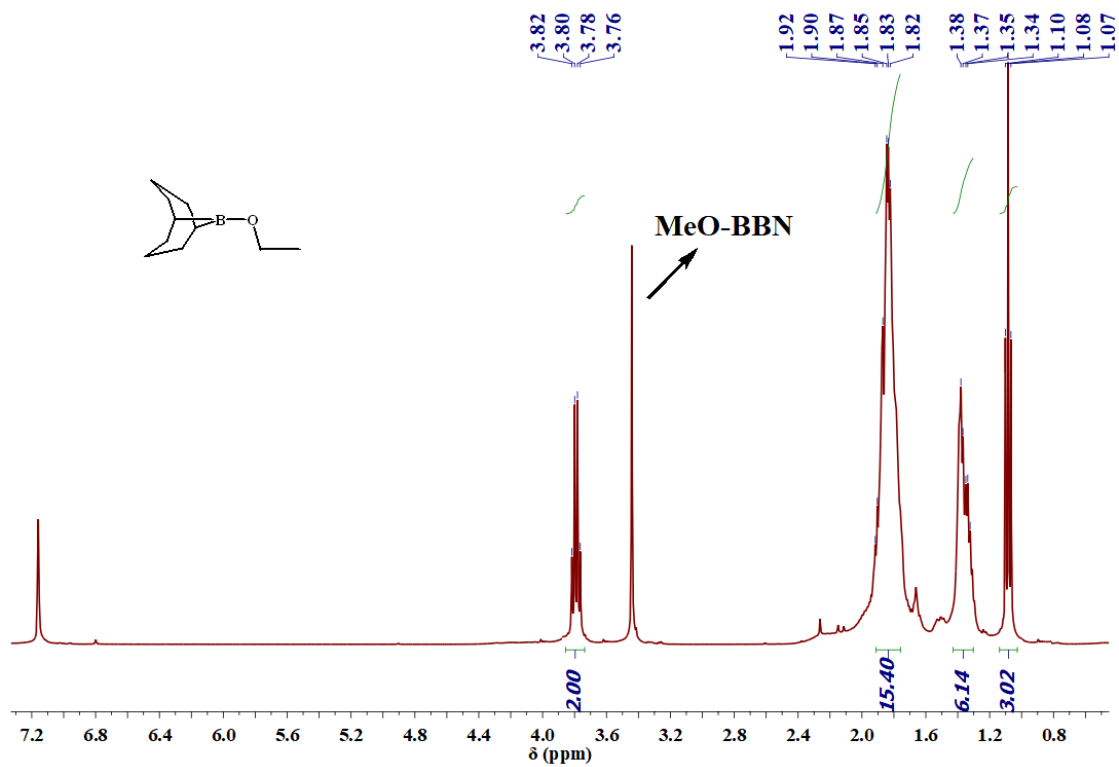

Figure S16.  $^1\text{H}$  NMR spectrum of **3b** in reaction mixture.

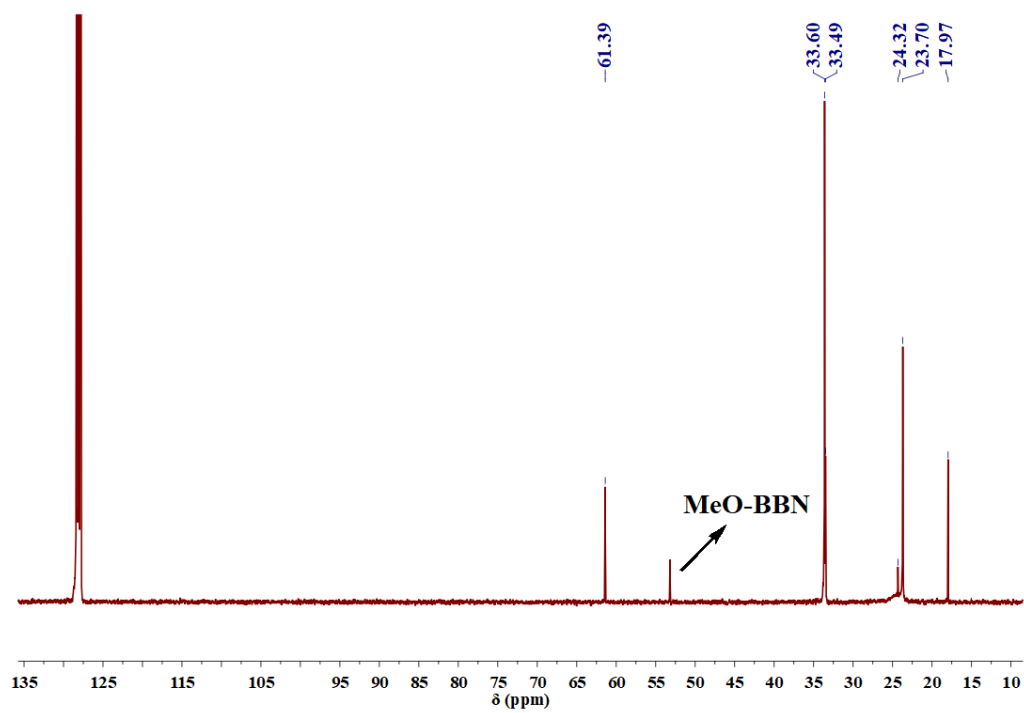

Figure S17.  $^{13}\text{C}$  NMR spectrum of **3b** in reaction mixture.

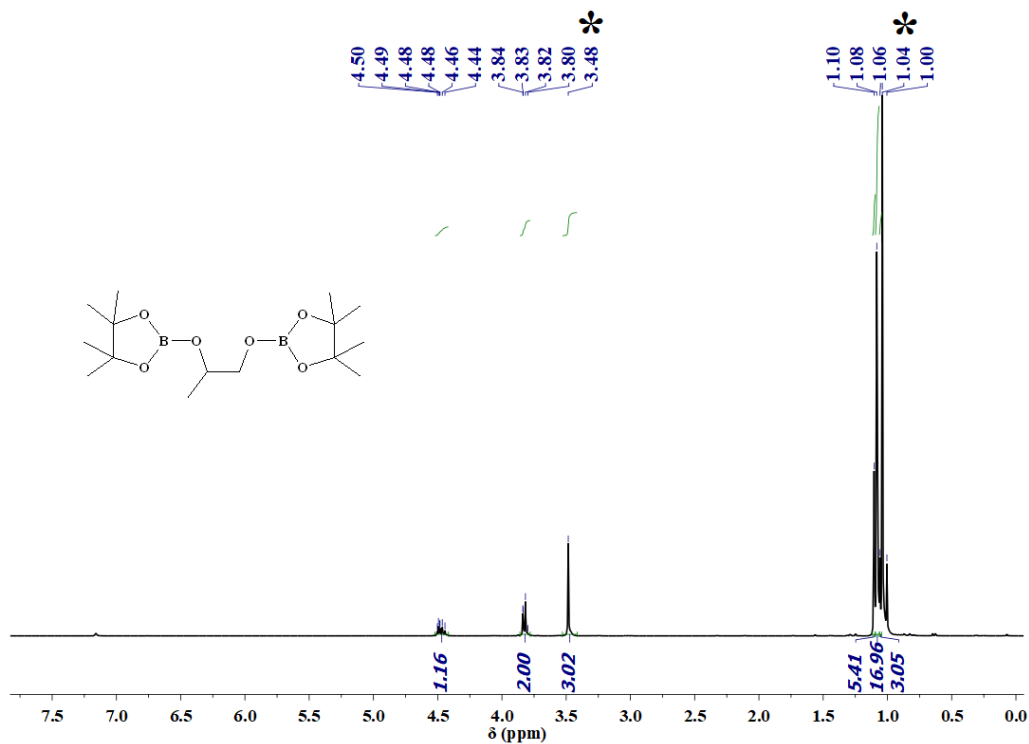

Figure S18. <sup>1</sup>H NMR spectrum of **2c** in reaction mixture.

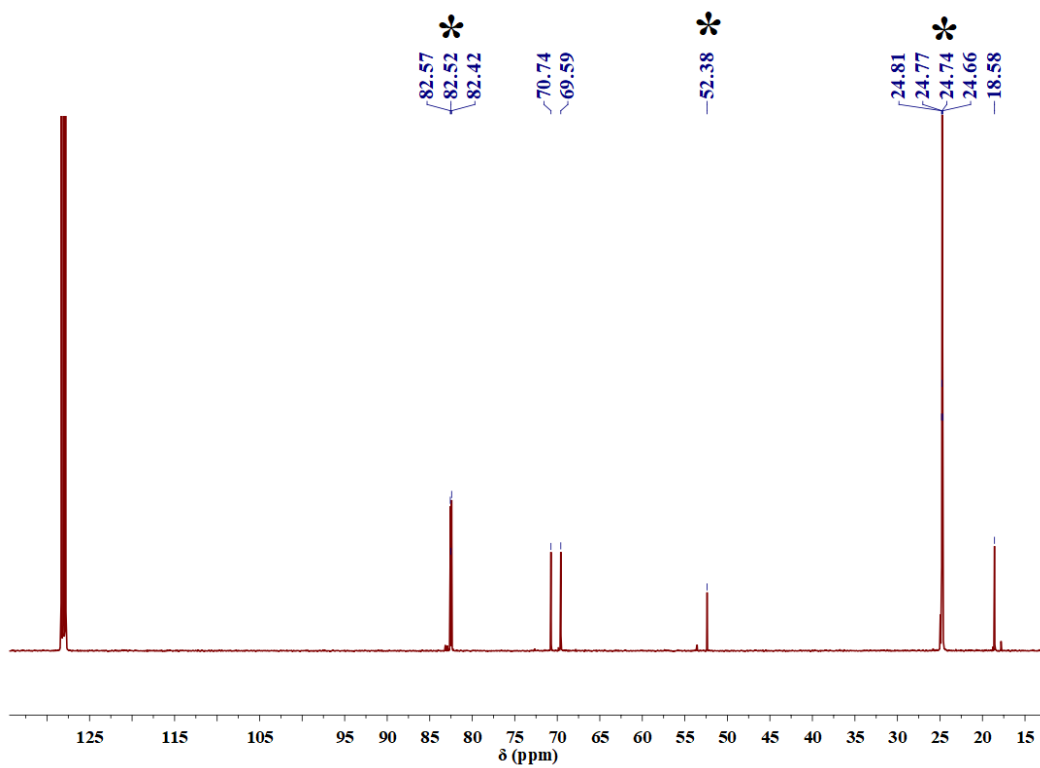

Figure S19. <sup>13</sup>C NMR spectrum of **2c** in reaction mixture.

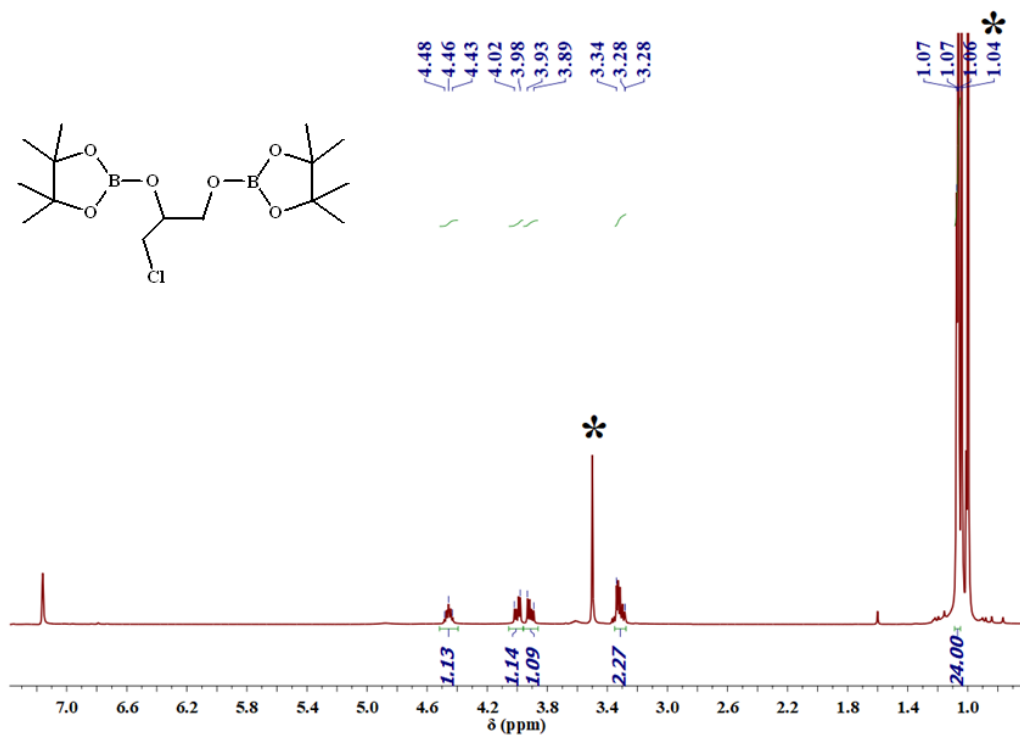

Figure S20. <sup>1</sup>H NMR spectrum of **2d** in reaction mixture.

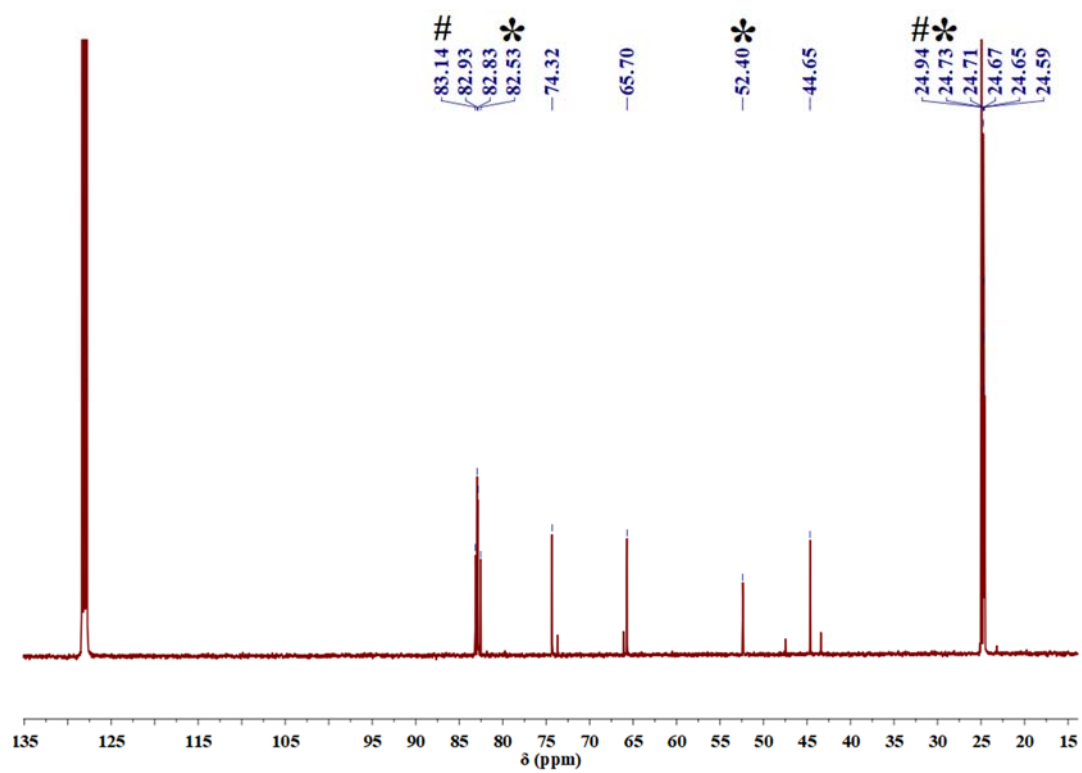

Figure S21. <sup>13</sup>C NMR spectrum of **2d** in reaction mixture.

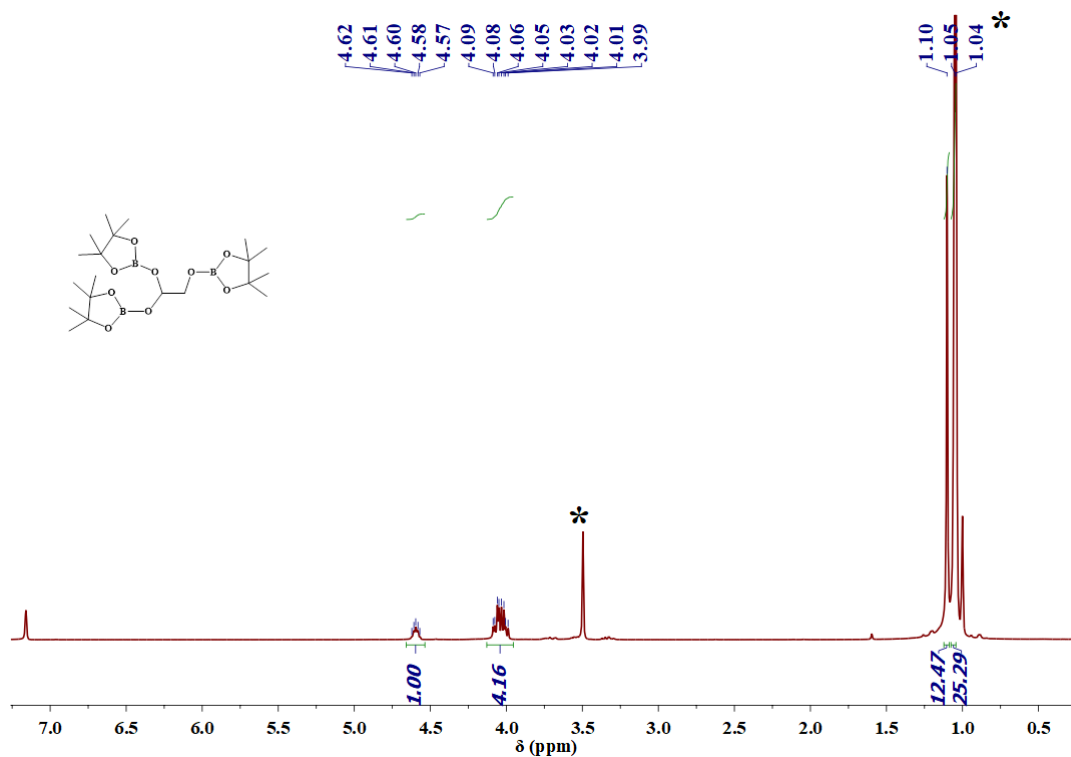

Figure S22.  $^1\text{H}$  NMR spectrum of **2e** in reaction mixture.

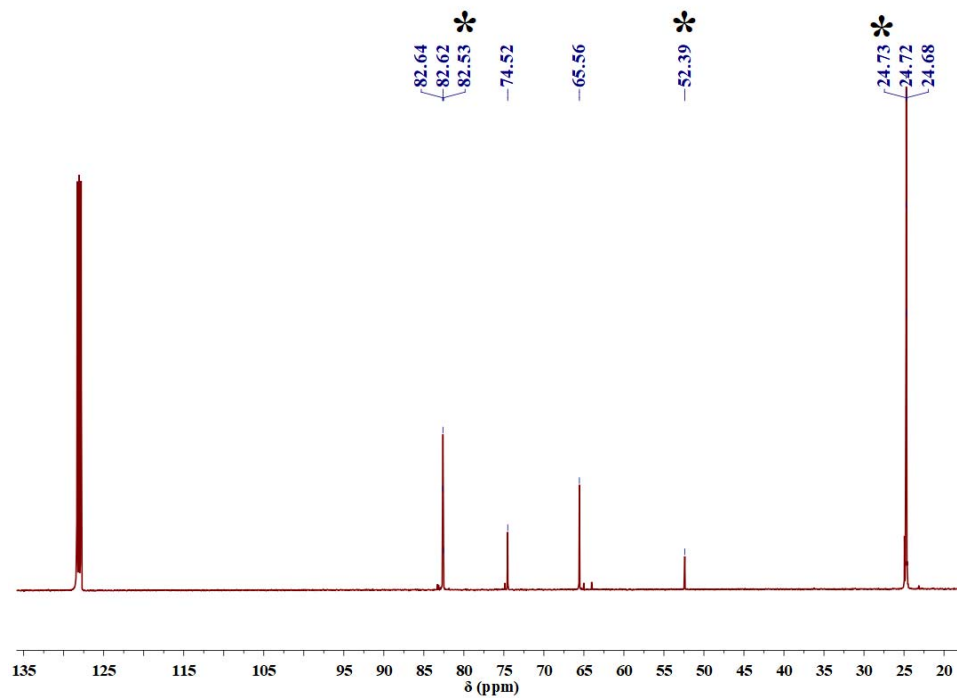

Figure S23.  $^{13}\text{C}$  NMR spectrum of **2e** in reaction mixture.

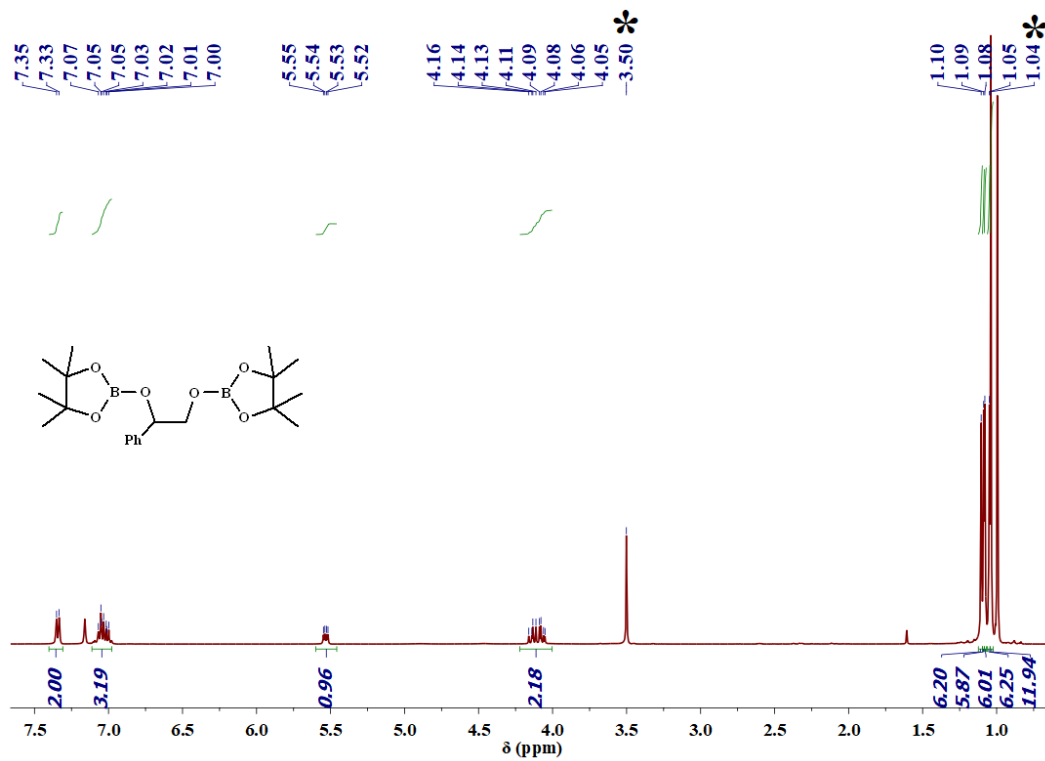

Figure S24. <sup>1</sup>H NMR spectrum of **2f** in reaction mixture.

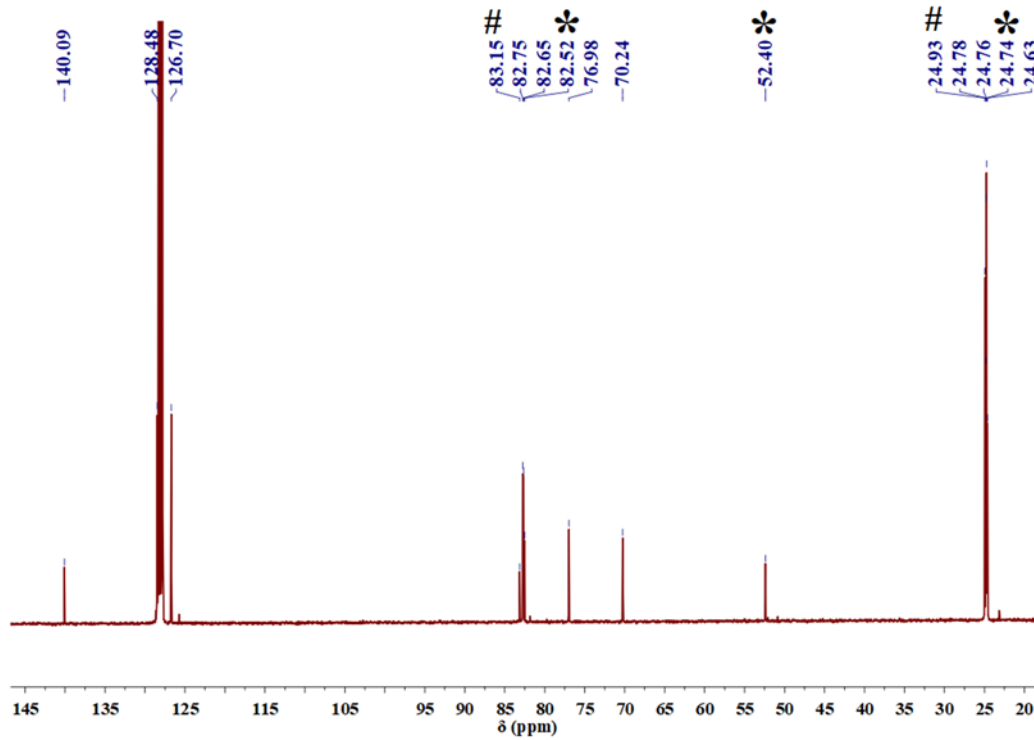

Figure S25. <sup>13</sup>C NMR spectrum of **2f** in reaction mixture.

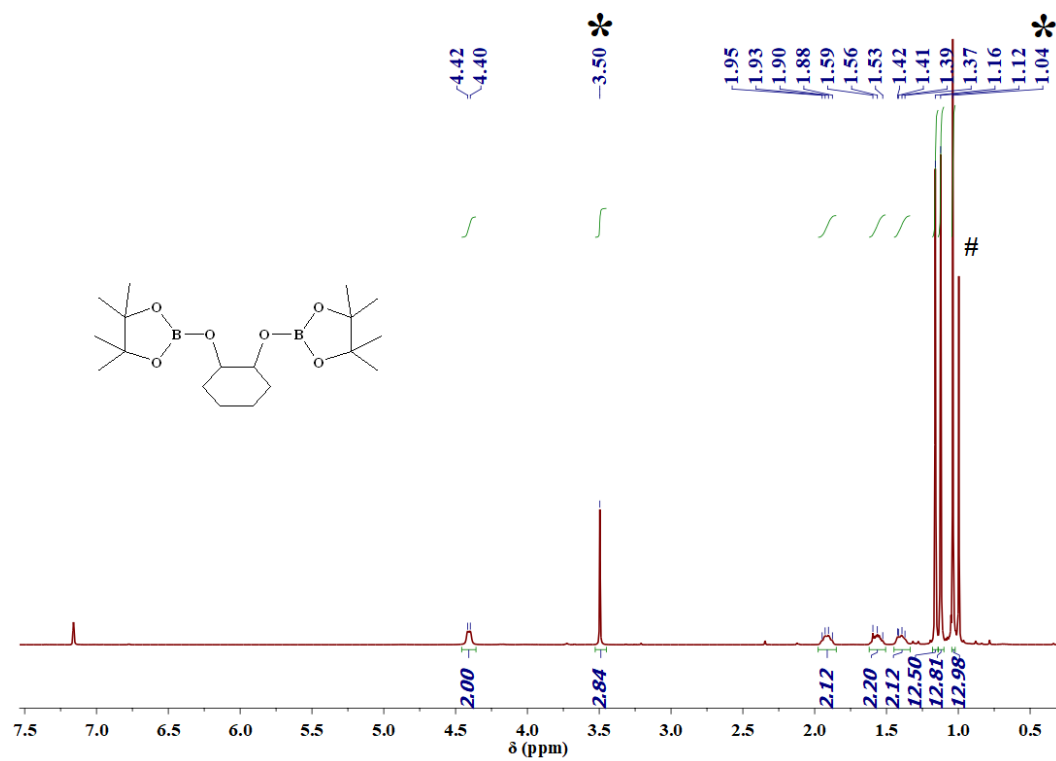

Figure S26. <sup>1</sup>H NMR spectrum of **2g** in reaction mixture.

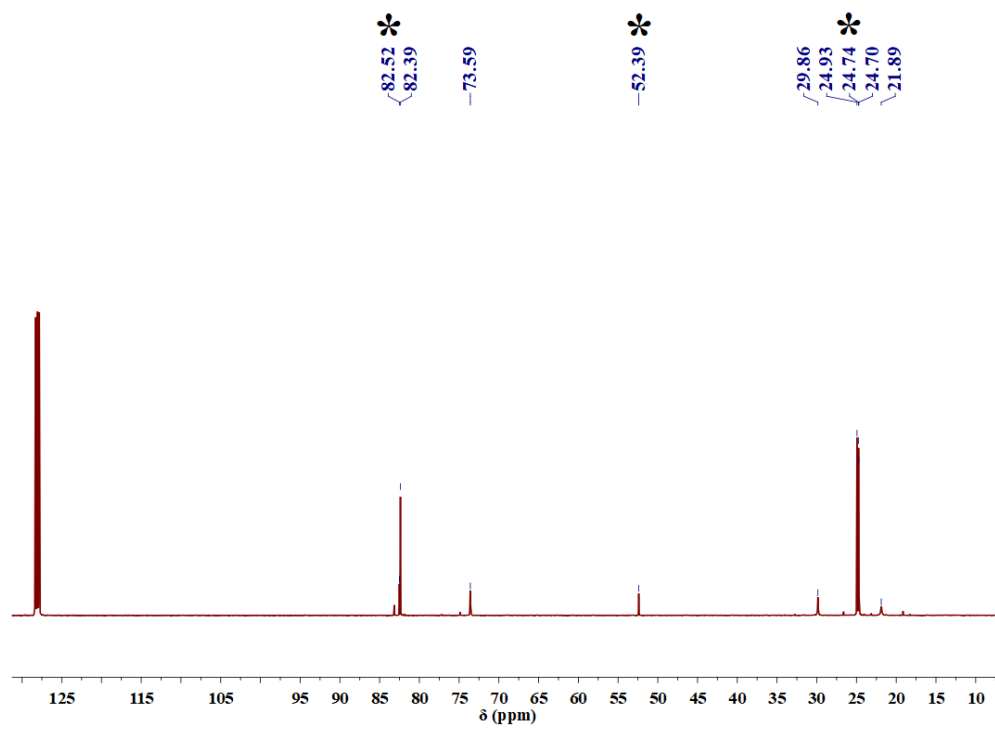

Figure S27. <sup>13</sup>C NMR spectrum of **2g** in reaction mixture (entry 5 in Table 2).



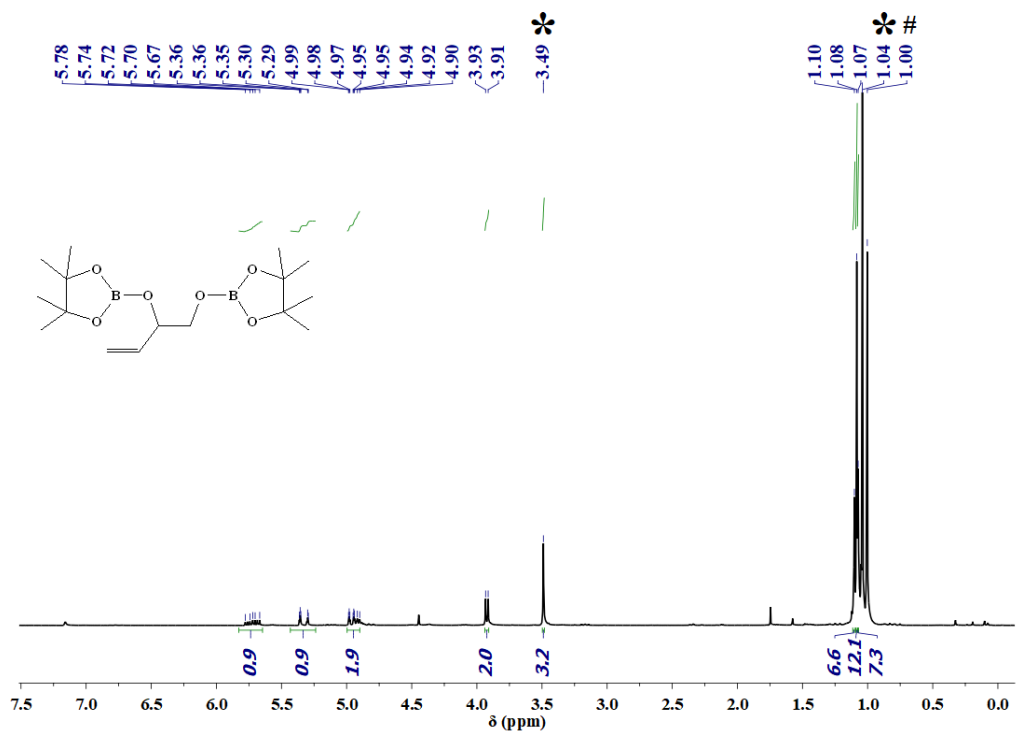

Figure S28. <sup>1</sup>H NMR spectrum of **2h** in reaction mixture.

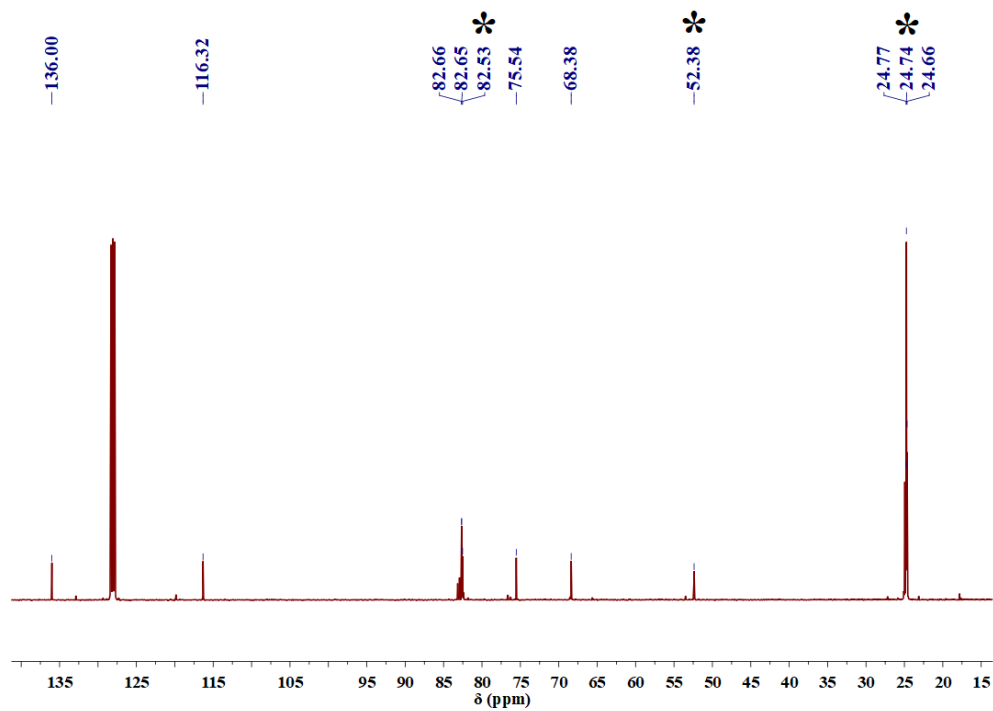

Figure S29. <sup>13</sup>C NMR spectrum of **2h** in reaction mixture.

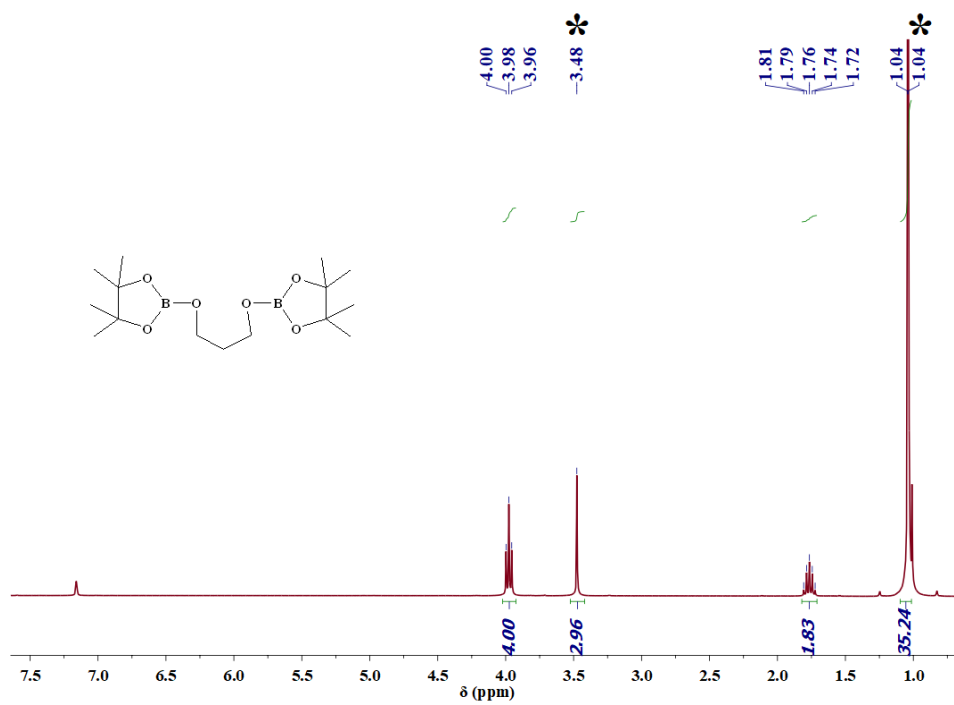

Figure S30. <sup>1</sup>H NMR spectrum of **2i** in reaction mixture.

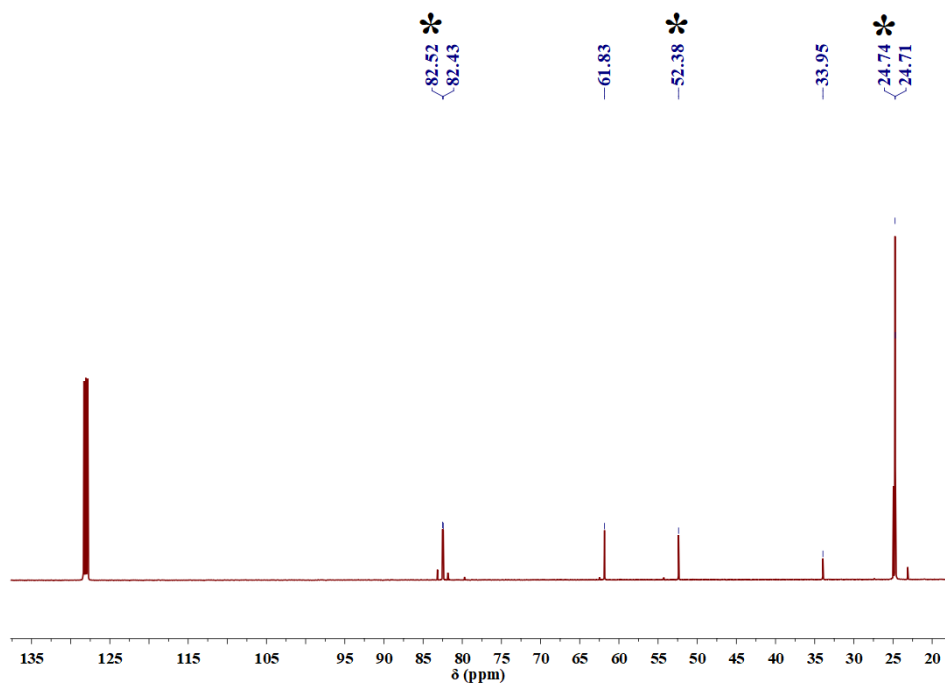

Figure S31. <sup>13</sup>C NMR spectrum of **2i** in reaction mixture.

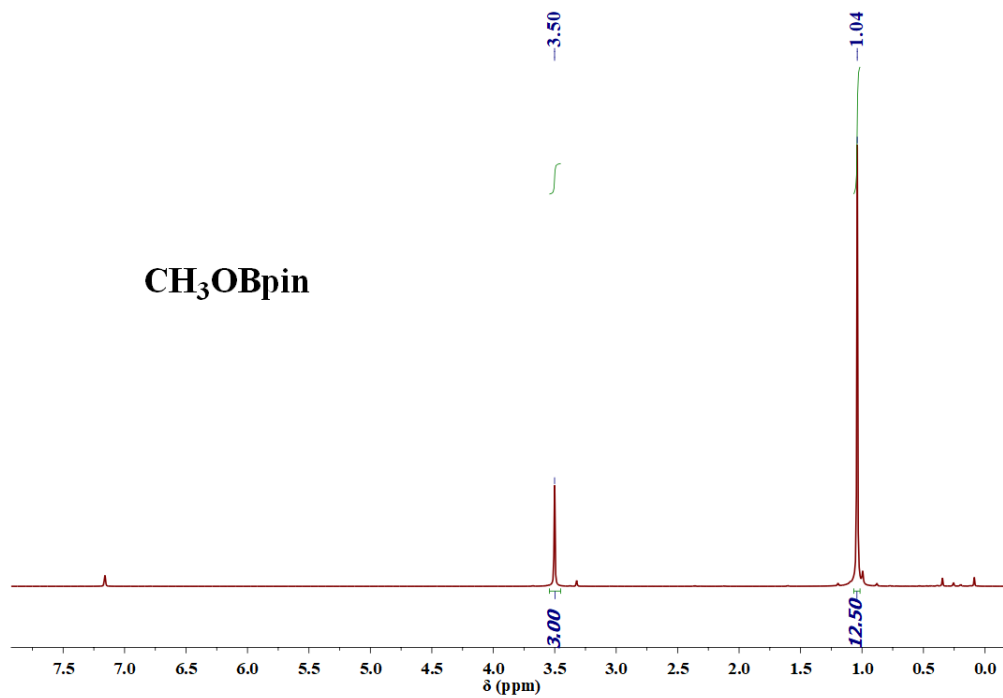

**Figure S32.** <sup>1</sup>H NMR spectrum of **3a** (Reaction of **1j** and HBpin) in reaction mixture.

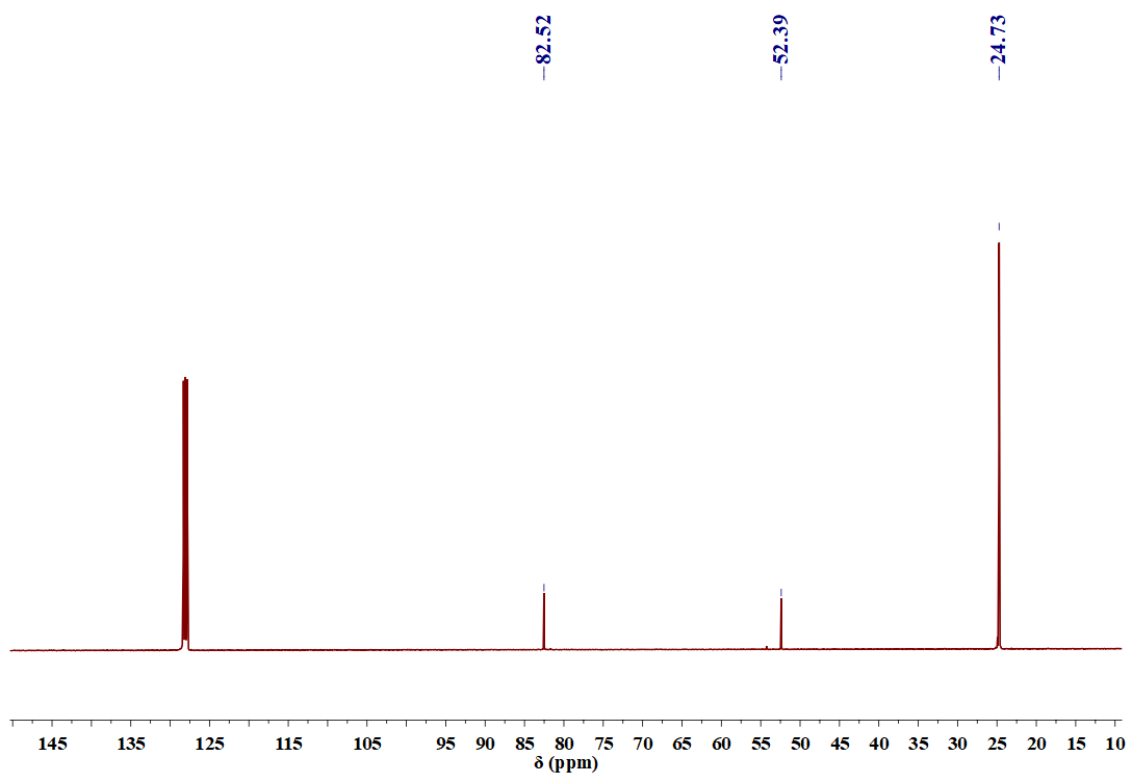

**Figure S33.** <sup>13</sup>C NMR spectrum of **3a** (Reaction of **1j** and HBpin) in reaction mixture.

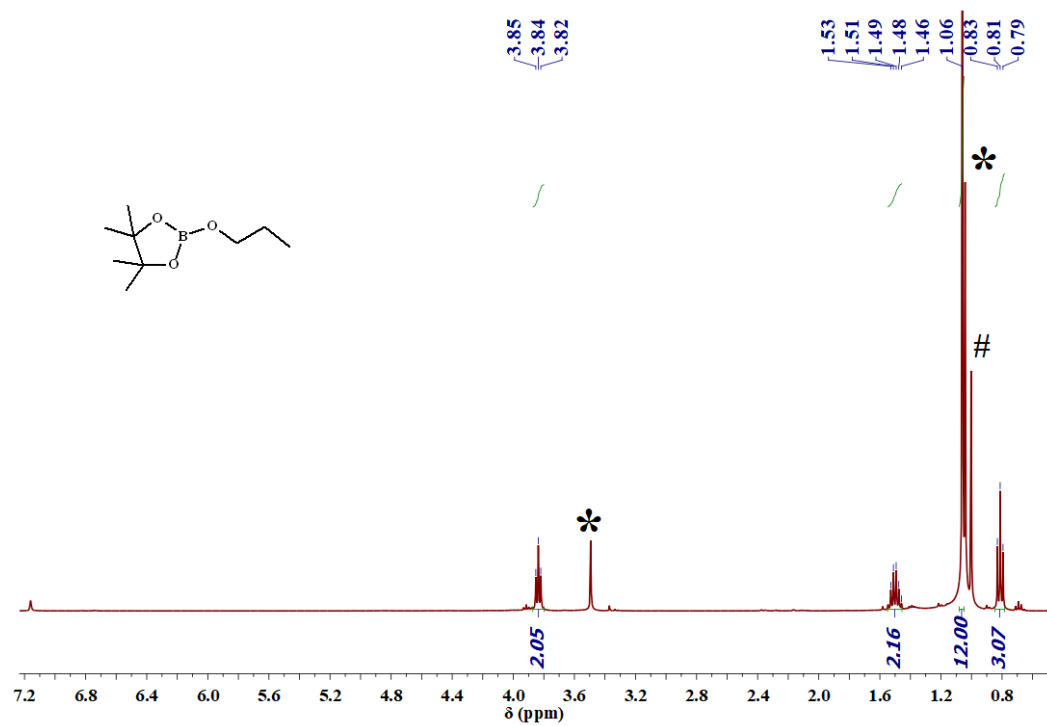

Figure S34. <sup>1</sup>H NMR spectrum of 2k in reaction mixture.

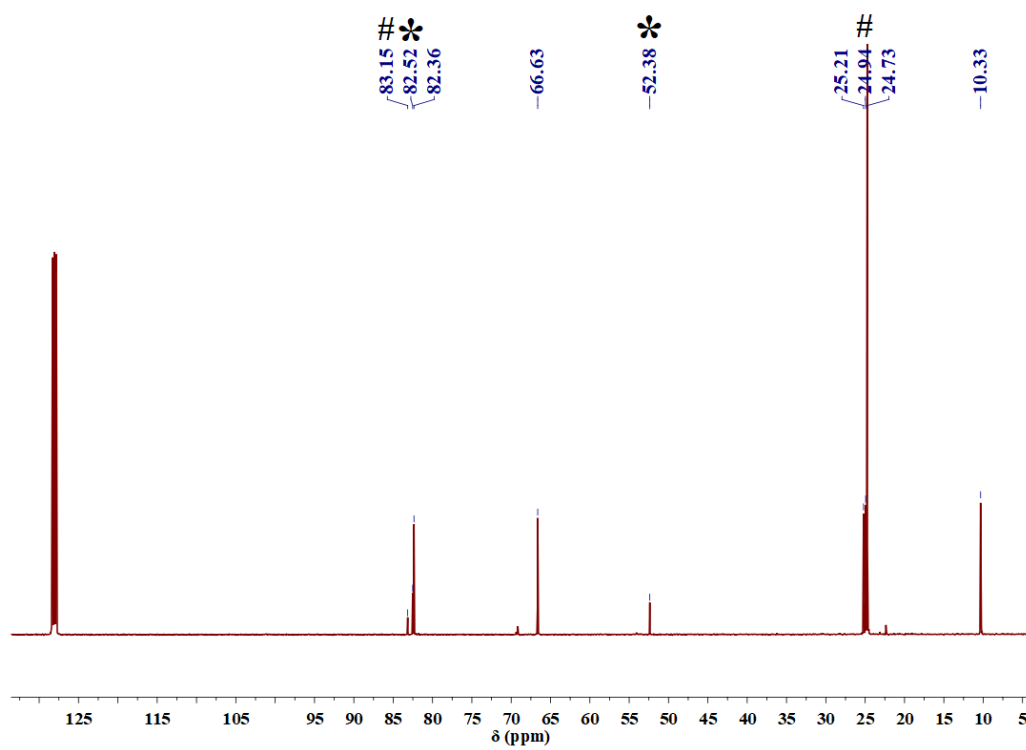

Figure S35. <sup>13</sup>C NMR spectrum of 2k in reaction mixture.

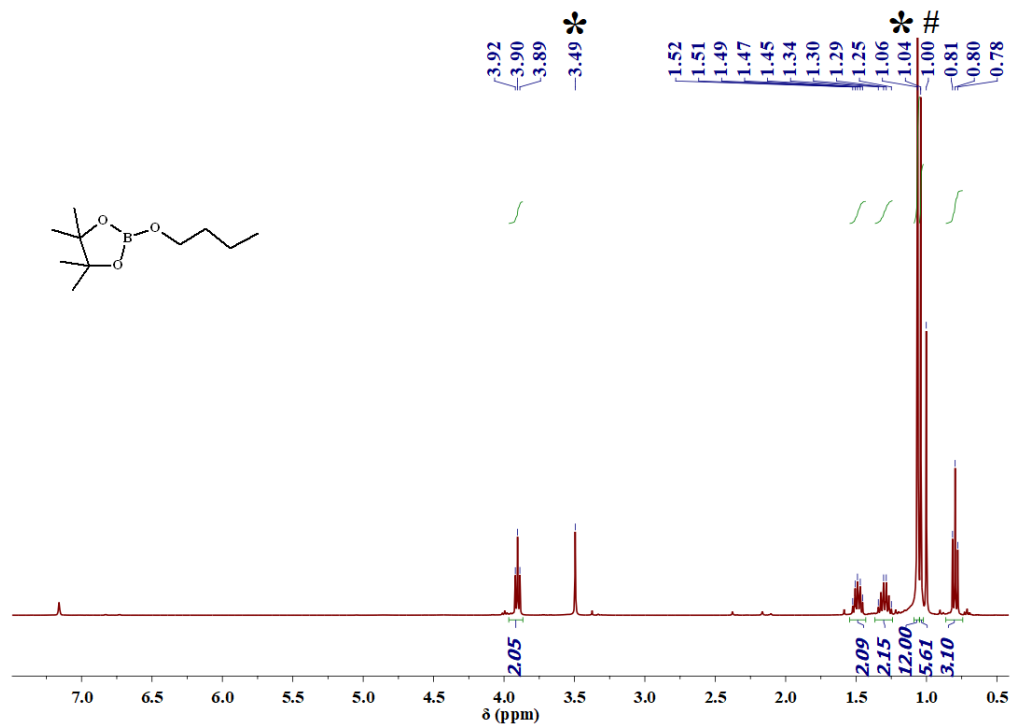

Figure S36. <sup>1</sup>H NMR spectrum of 2I in reaction mixture.

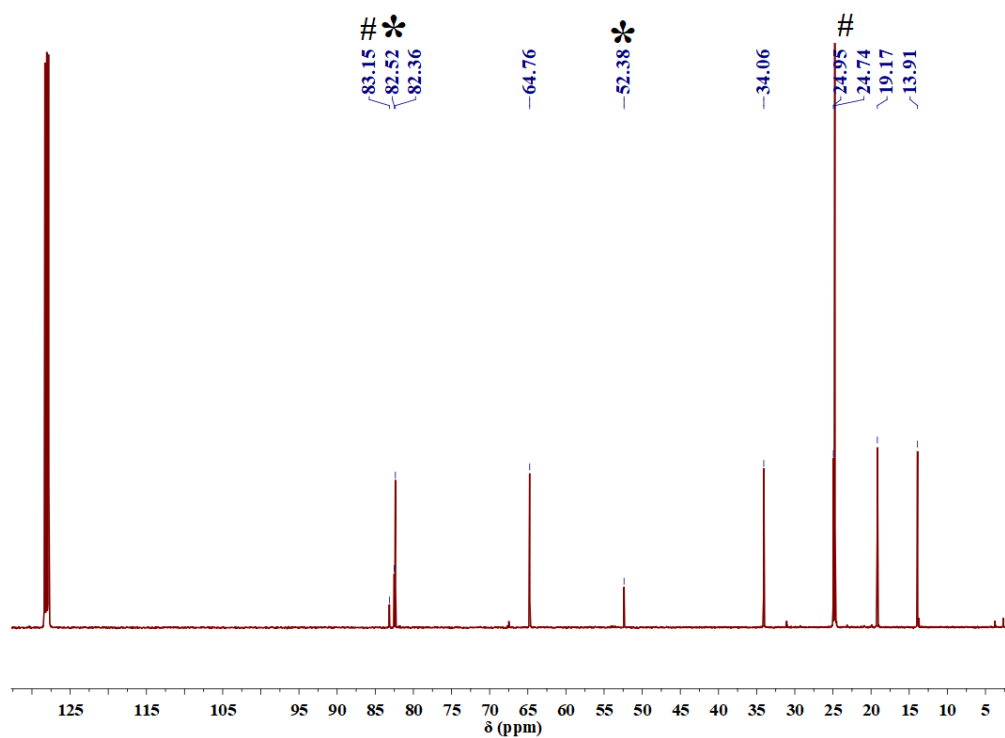

Figure S37. <sup>13</sup>C NMR spectrum of 2I in reaction mixture.

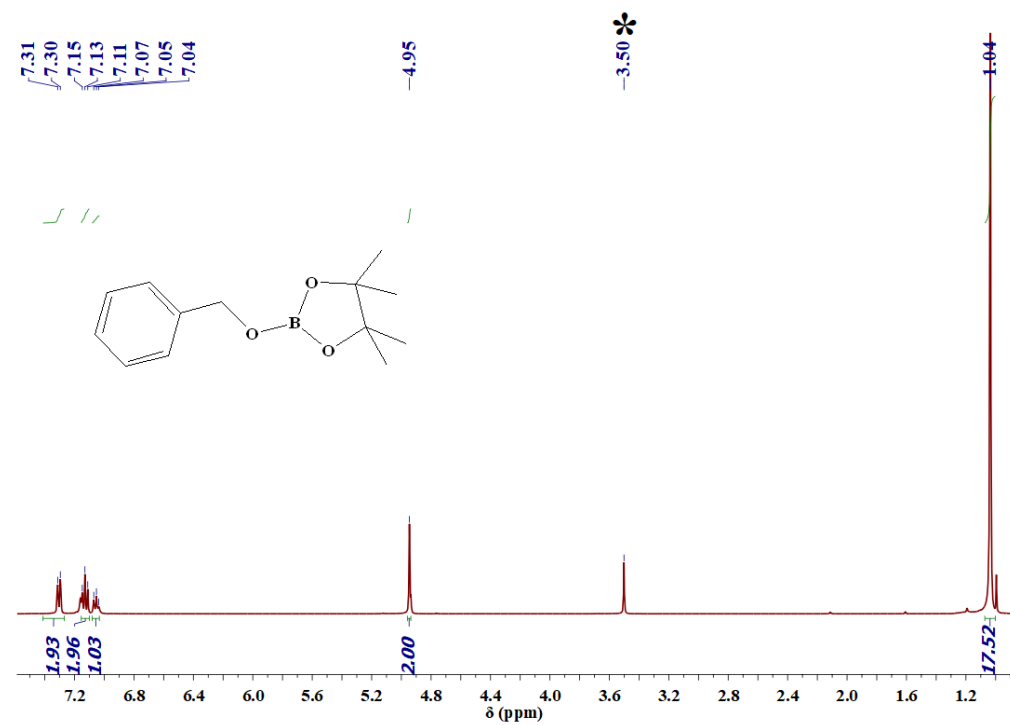

Figure S38.  $^1\text{H}$  NMR spectrum of **2m** in reaction mixture.

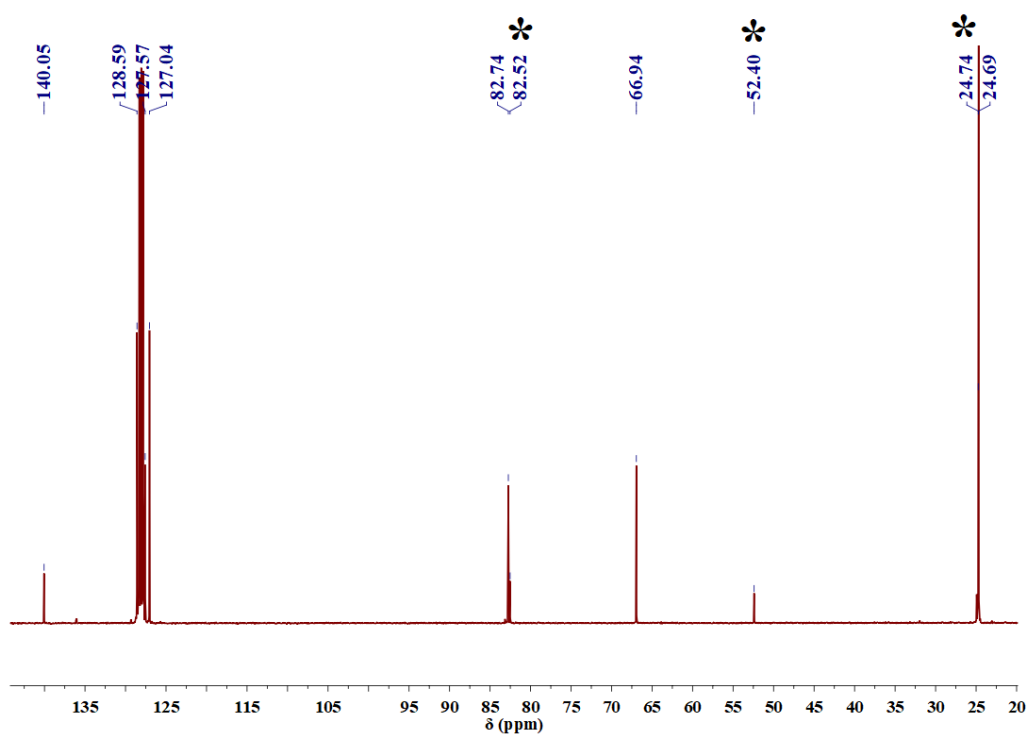

Figure S39.  $^{13}\text{C}$  NMR spectrum of **2m** in reaction mixture.

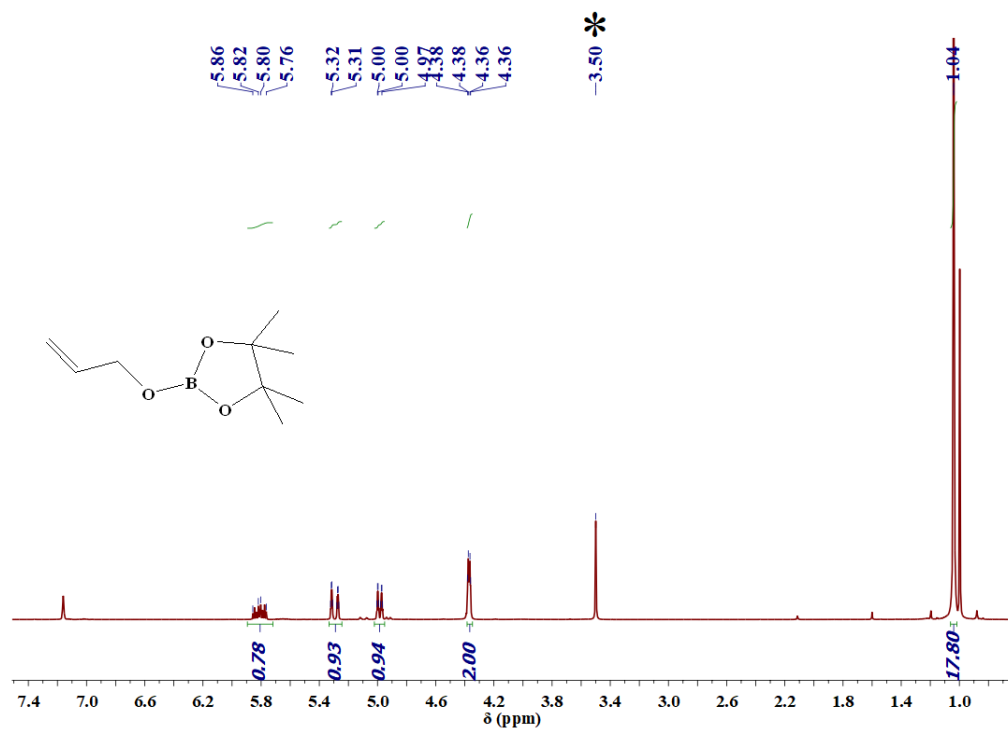

Figure S40. <sup>1</sup>H NMR spectrum of **2n** in reaction mixture.

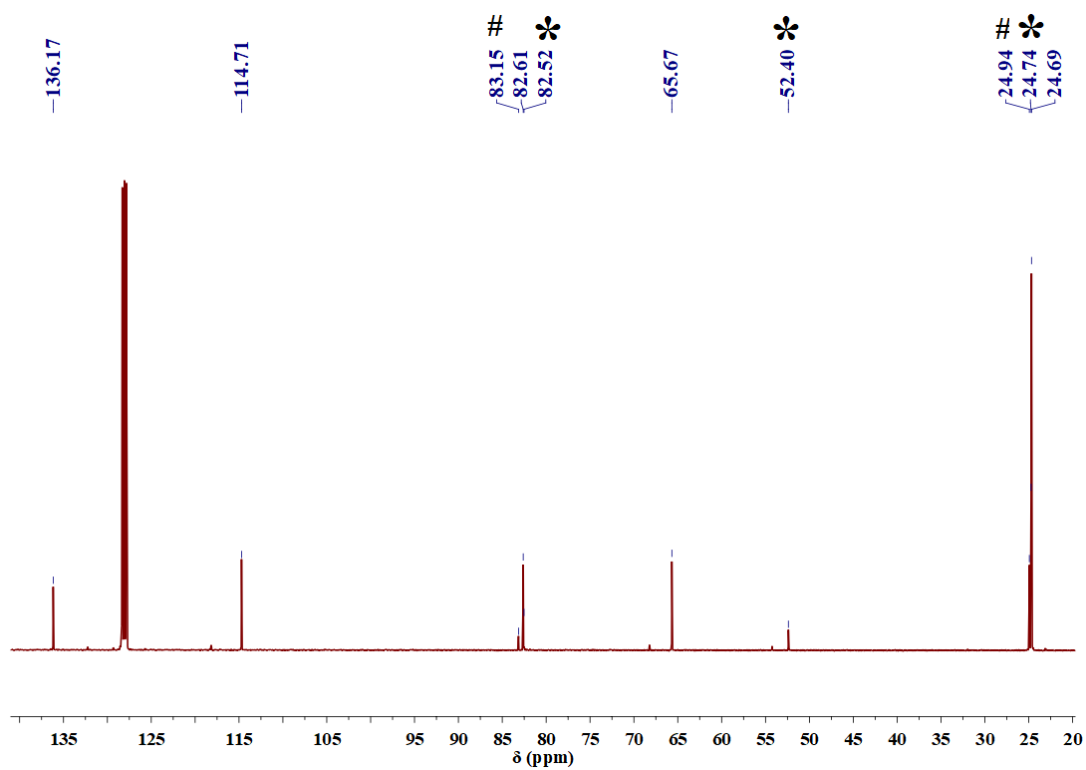

Figure S41. <sup>13</sup>C NMR spectrum of **2n** in reaction mixture.

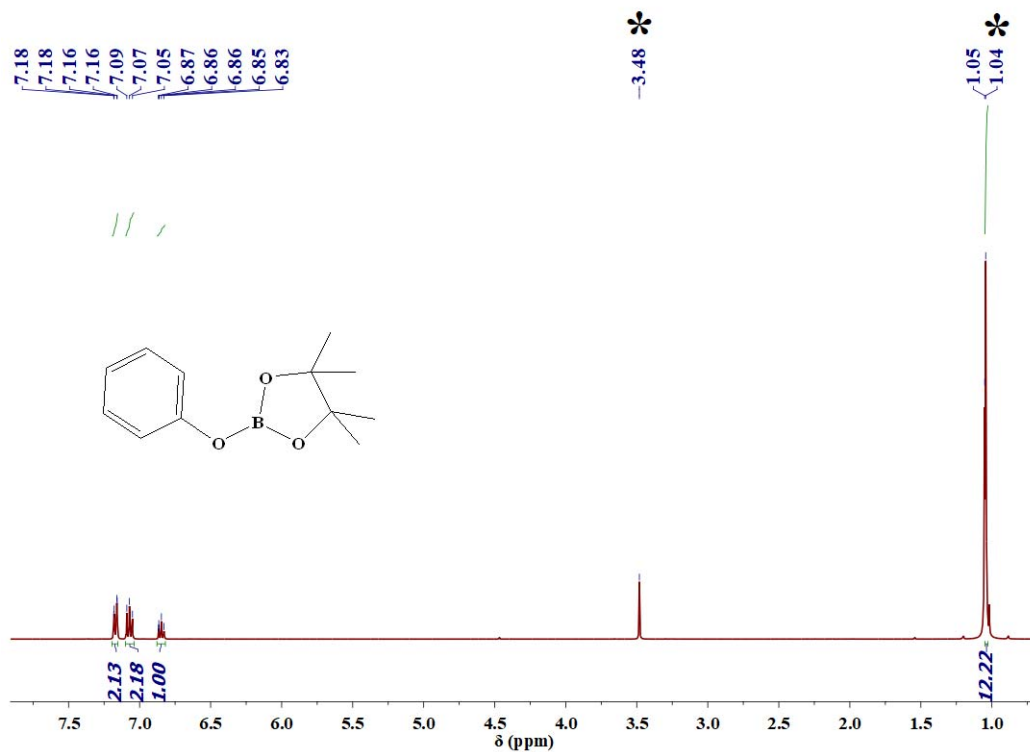

Figure S42.  $^1\text{H}$  NMR spectrum of **2p** in reaction mixture.

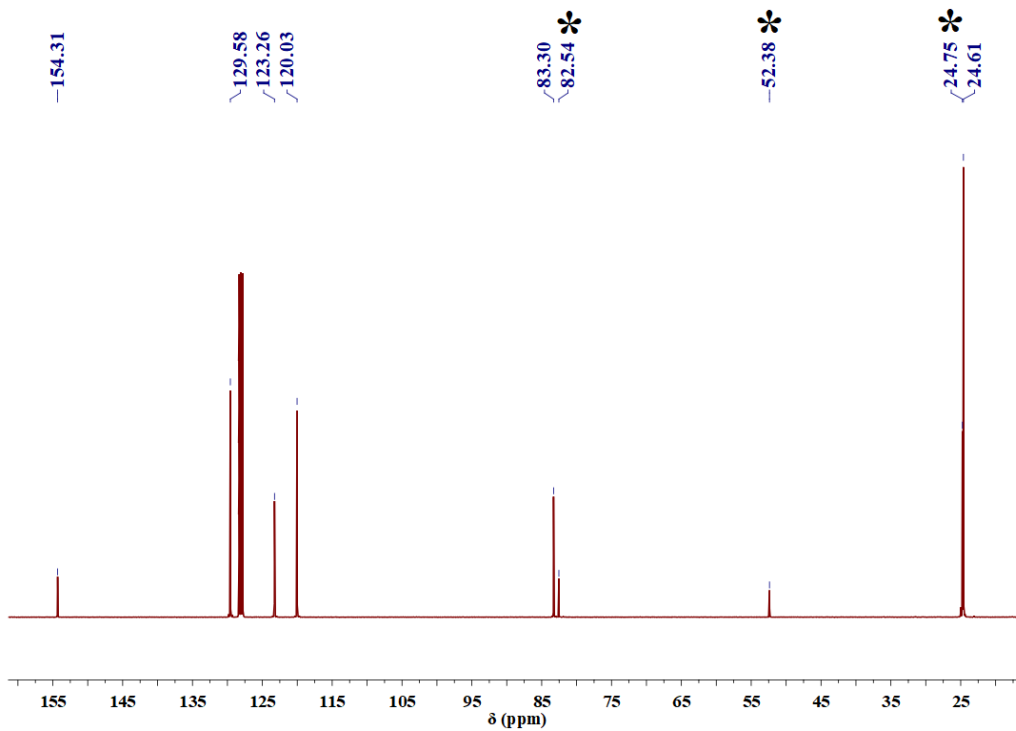

Figure S43.  $^{13}\text{C}$  NMR spectrum of **2p** in reaction mixture.



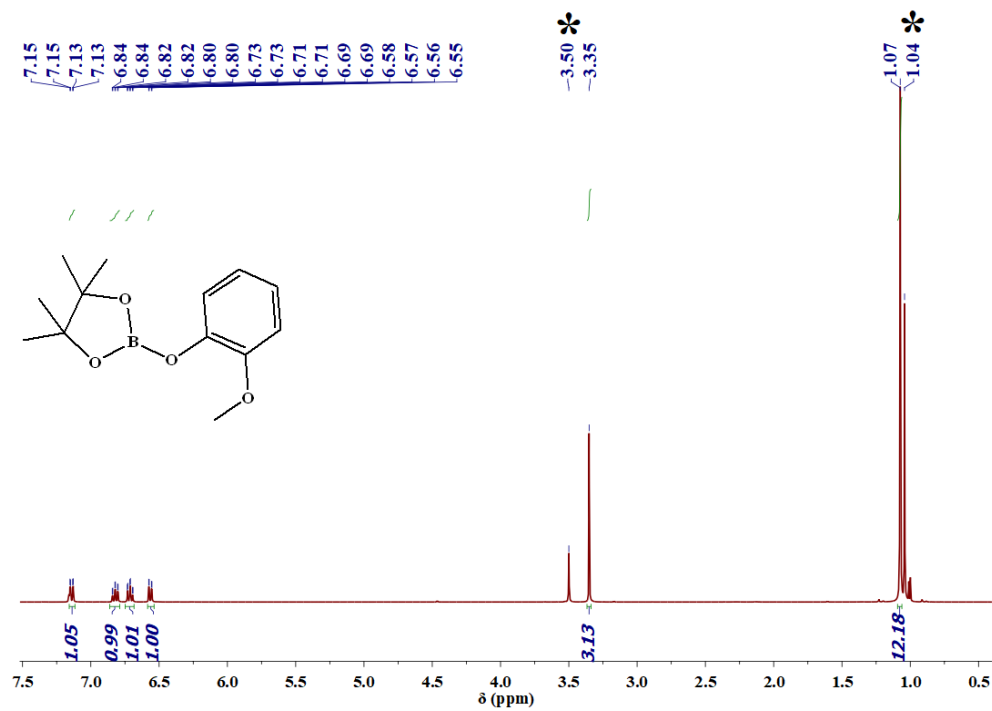

Figure S44.  $^1\text{H}$  NMR spectrum of 2q in reaction mixture.

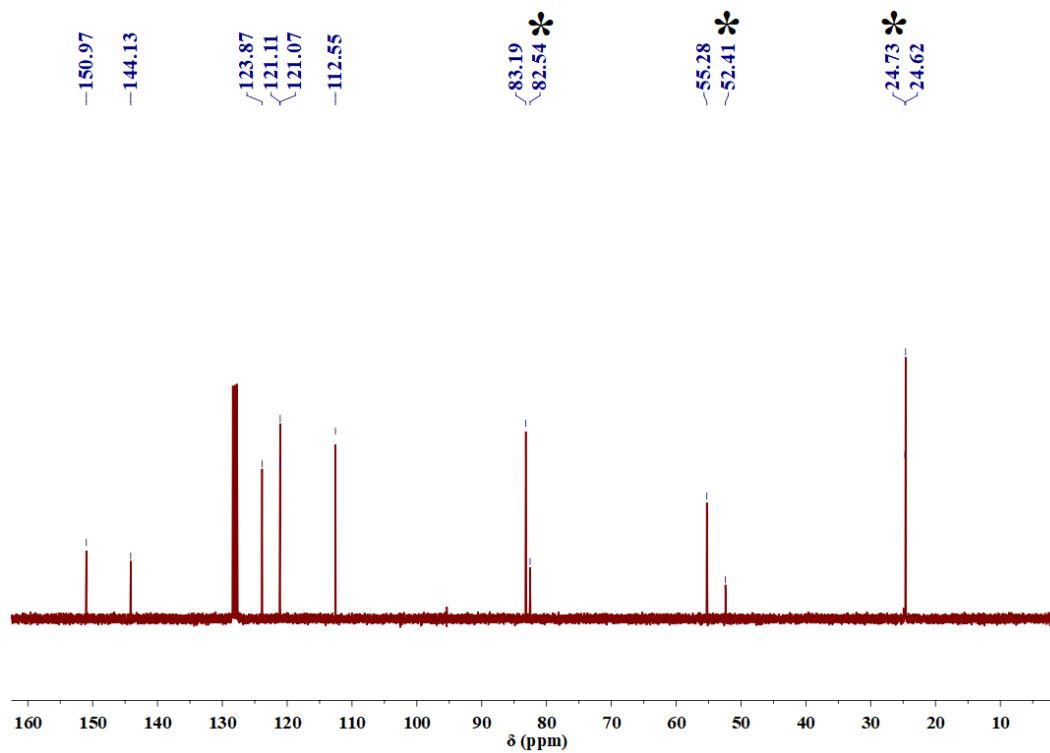

Figure S45.  $^{13}\text{C}$  NMR spectrum of 2q in reaction mixture.

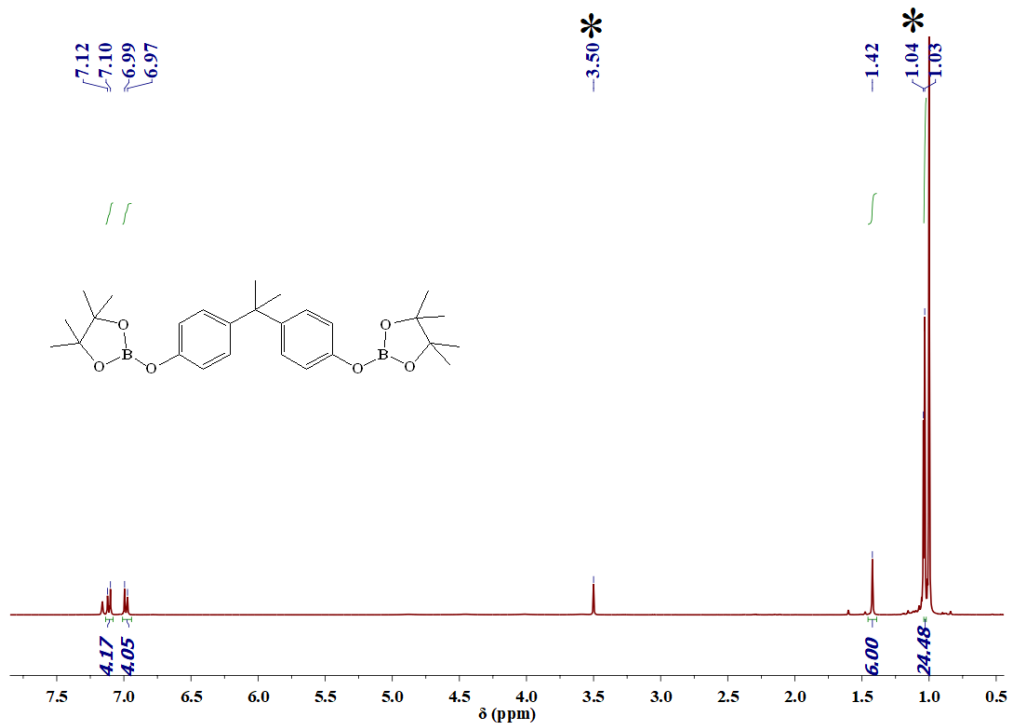

Figure S46. <sup>1</sup>H NMR spectrum of **2t** in reaction mixture.

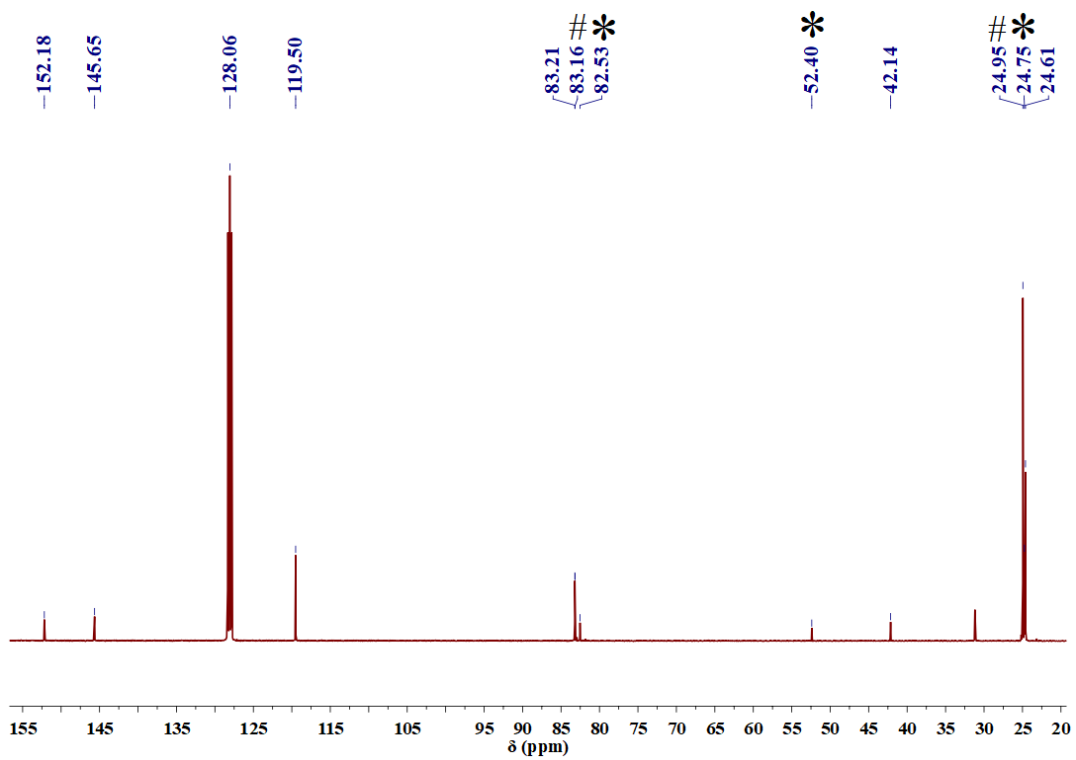

Figure S47. <sup>13</sup>C NMR spectrum of **2t** in reaction mixture.

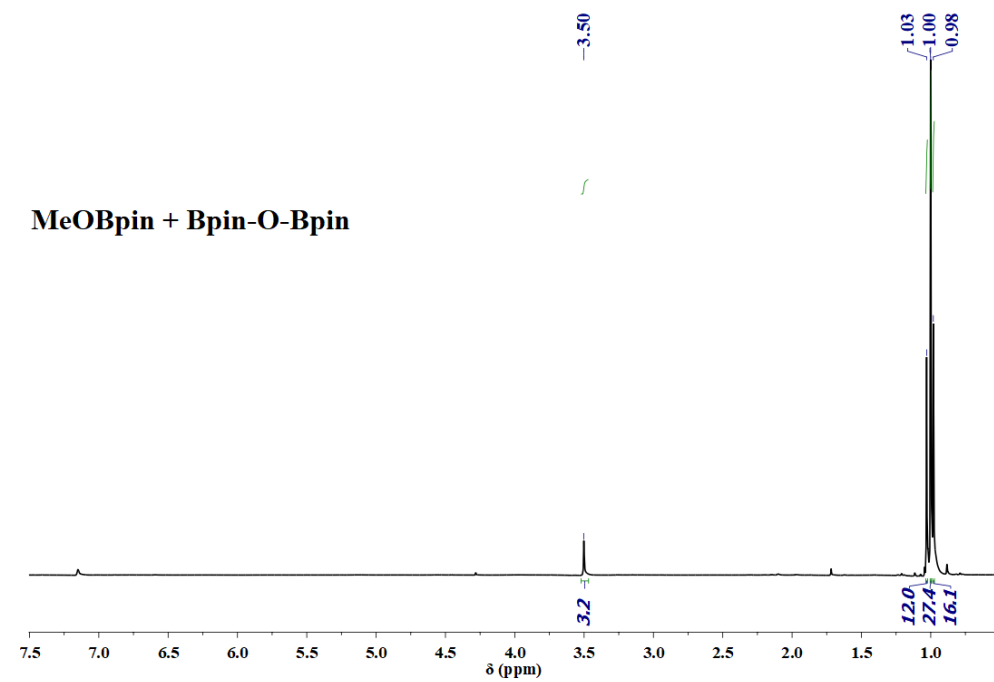

Figure S48.  $^1\text{H}$  NMR spectrum of reduction of  $\text{CO}_2$ .

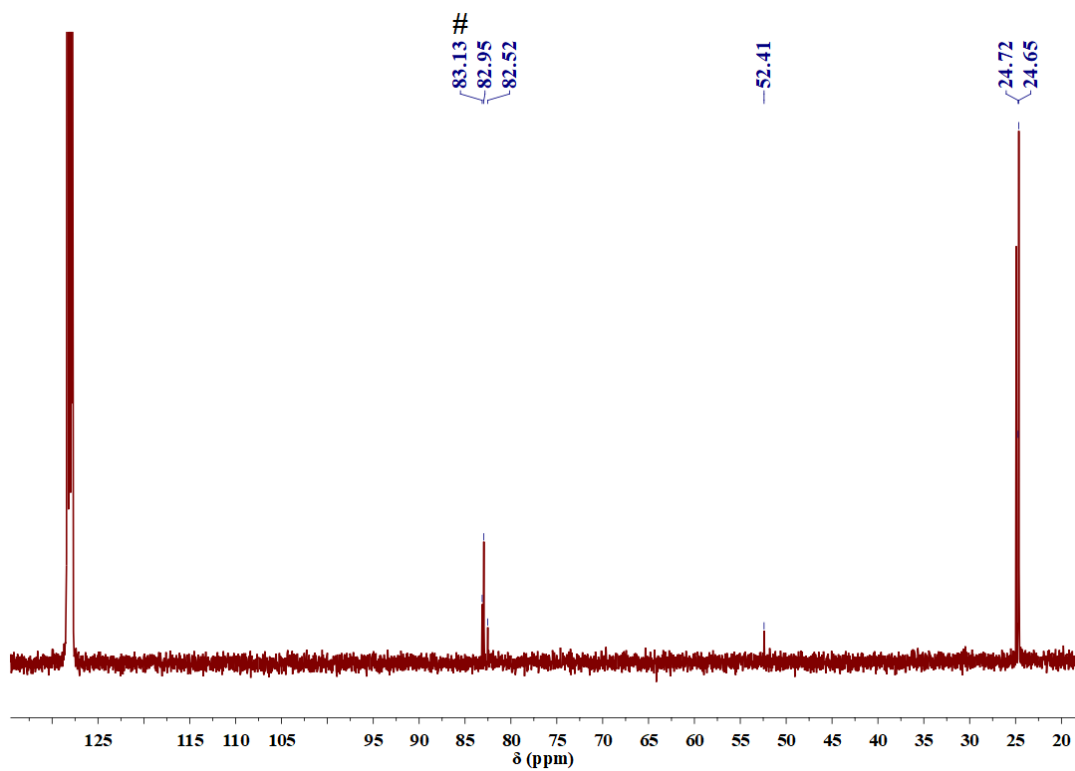

Figure S49.  $^{13}\text{C}$  NMR spectrum of reduction of  $\text{CO}_2$ .

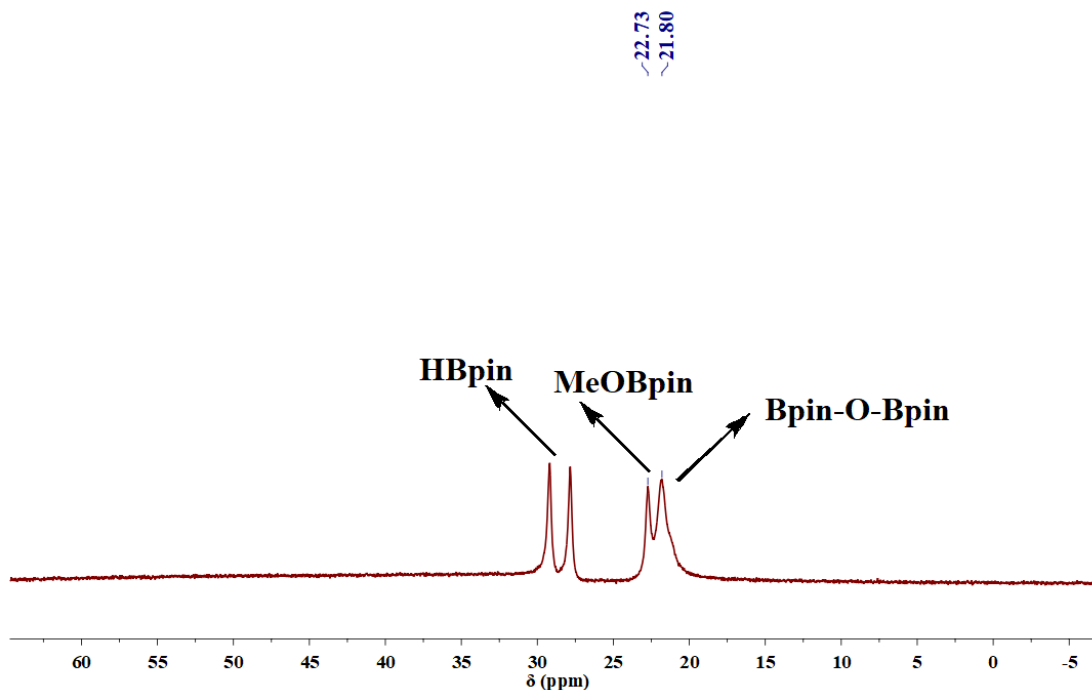

**Figure S50.**  $^{11}\text{B}$  NMR spectrum of reduction of  $\text{CO}_2$  (Entry 19, table 2).

## 5. Kinetic experiments

All the kinetic experiments were done in a similar method. In the glove box, to a J. Young NMR tube, typical amount of thorium catalyst (**Th-4**), ethylene carbonate and HBpin from a stock solution (**Th-4**, 10 mM, ethylene carbonate 100 mM and HBpin 300 mM) are transferred diluted to 0.6 ml by adding  $\text{C}_6\text{D}_6$  and the NMR tube immediately loaded for measurement. All the experiments were done by changing either one substrate or the catalyst while keeping the other reagents constant and the data was collected early in the reaction (conversion less than 20%). The product concentrations were measured by the signal area ratio of the  $-\text{CH}_2-$  hydrogen of reagent and product. Reaction rates were determined by least-square fit of the initial product concentration versus time.

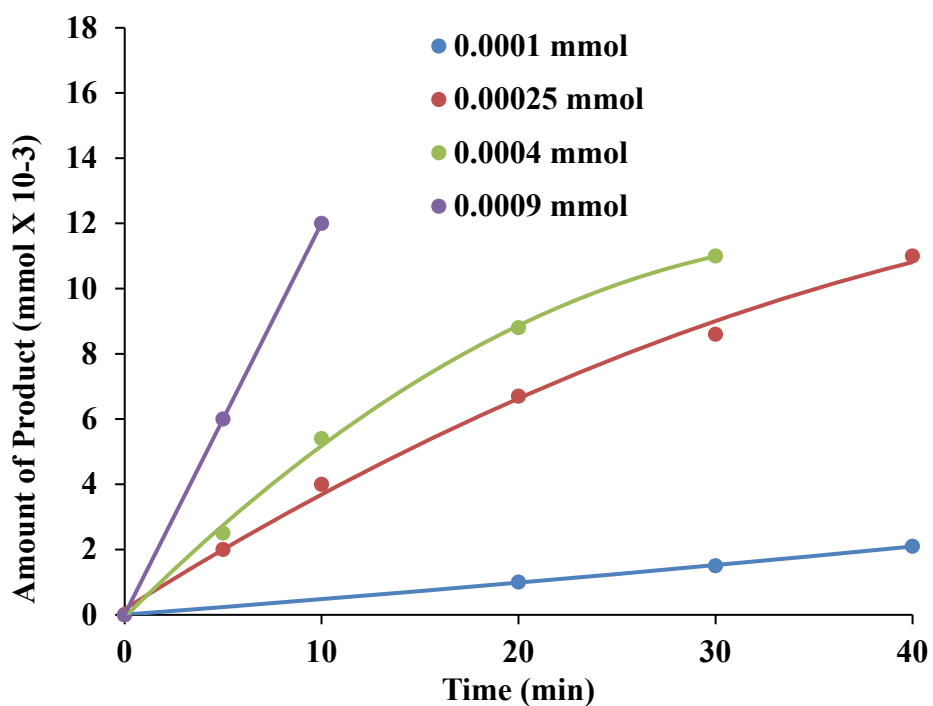

**Figure S51.** Plot of amount of product ( $\times 10^{-3}$  mmol) vs. time (min) in the reaction of 0.1 mmol of ethylene carbonate and 0.3 mmol of HBpin catalyzed by different amount of **Th-4** at room temperature.

| [Th-4] (mmol) $\times 10^{-3}$ | Rate (mmol/min) $\times 10^{-3}$ | ln[Th-4] | ln(Rate) |
|--------------------------------|----------------------------------|----------|----------|
| 0.10                           | 0.060                            | -9.210   | -9.721   |
| 0.25                           | 0.315                            | -8.294   | -8.026   |
| 0.40                           | 0.440                            | -7.824   | -7.728   |
| 0.90                           | 0.920                            | -7.013   | -6.991   |

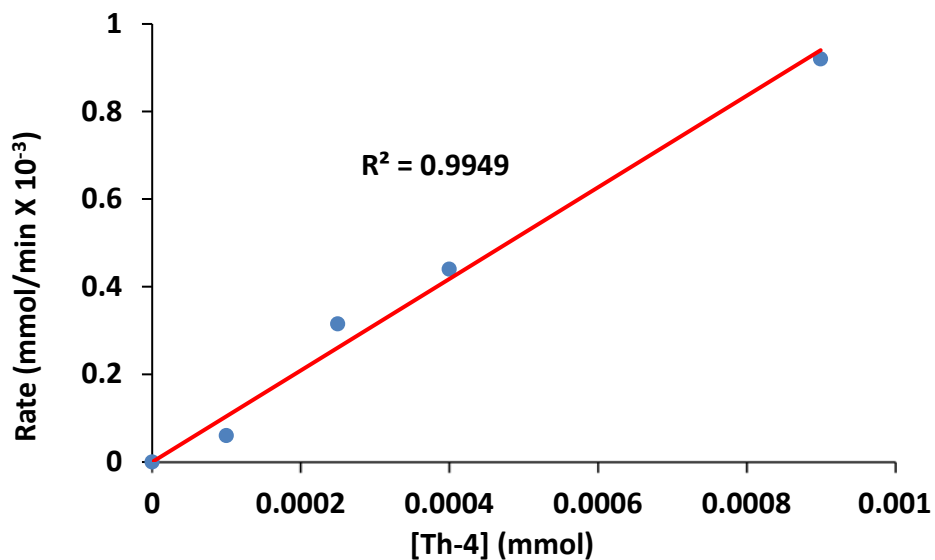

**Figure S52.** Plot of rate ( $\times 10^{-3}$  mmol) vs. Th-4 concentrations in the reaction of ethylene carbonate and HBpin at room temperature.

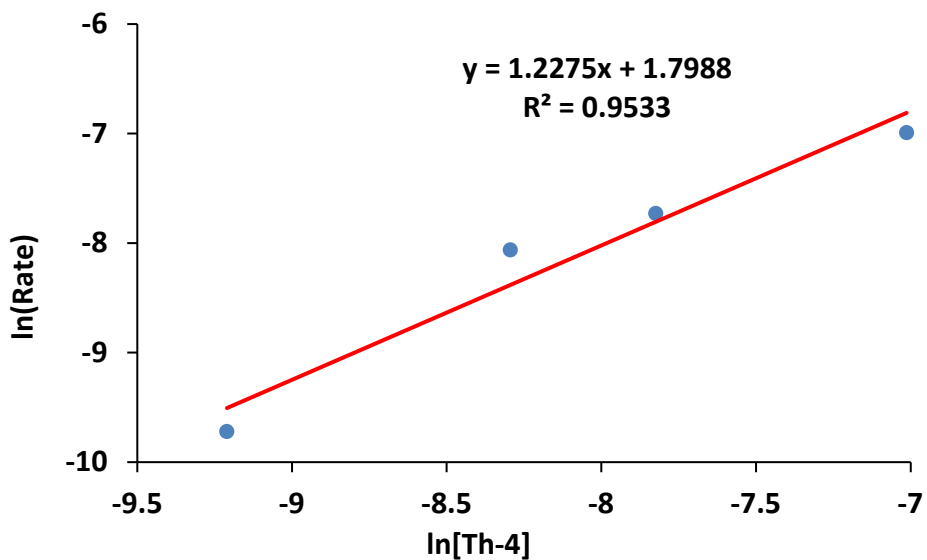

**Figure S53.** Plot of  $\ln(\text{rate})$  vs.  $\ln[\text{Th-4}]$ .

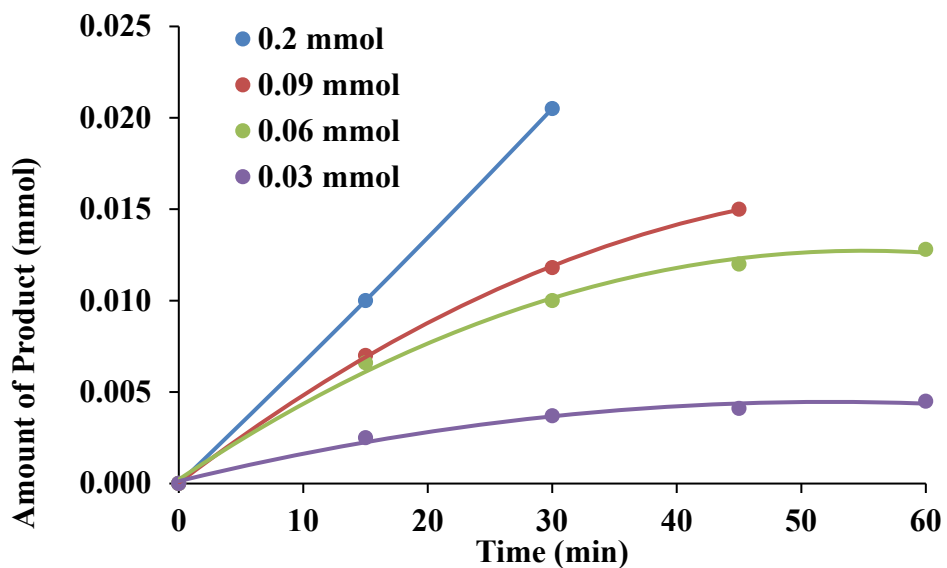

**Figure S54.** Plot of amount of product ( $\times 10^{-3}$  mmol) vs. time in the reaction of 0.1 mmol of ethylene carbonate and different HBpin amount catalyzed by 0.001 mmol of **Th-4** at room temperature.

| [HBpin] (mmol) | Rate (mmol/min) $\times 10^{-3}$ | ln[HBpin] | ln(rate) |
|----------------|----------------------------------|-----------|----------|
| 0.03           | 0.122                            | -3.506    | -9.003   |
| 0.06           | 0.313                            | -2.813    | -8.069   |
| 0.09           | 0.395                            | -2.407    | -7.836   |
| 0.20           | 0.684                            | -1.609    | -7.287   |

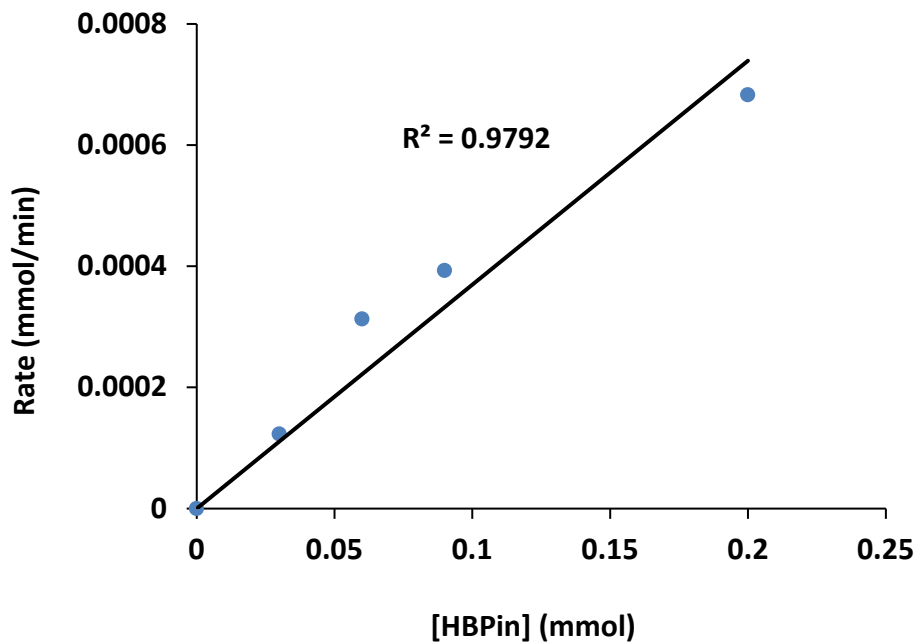

**Figure S55.** Plot of rate ( $\times 10^{-3}$  mmol) vs. HBpin amount in the reaction of ethylene carbonate and HBpin at room temperature.

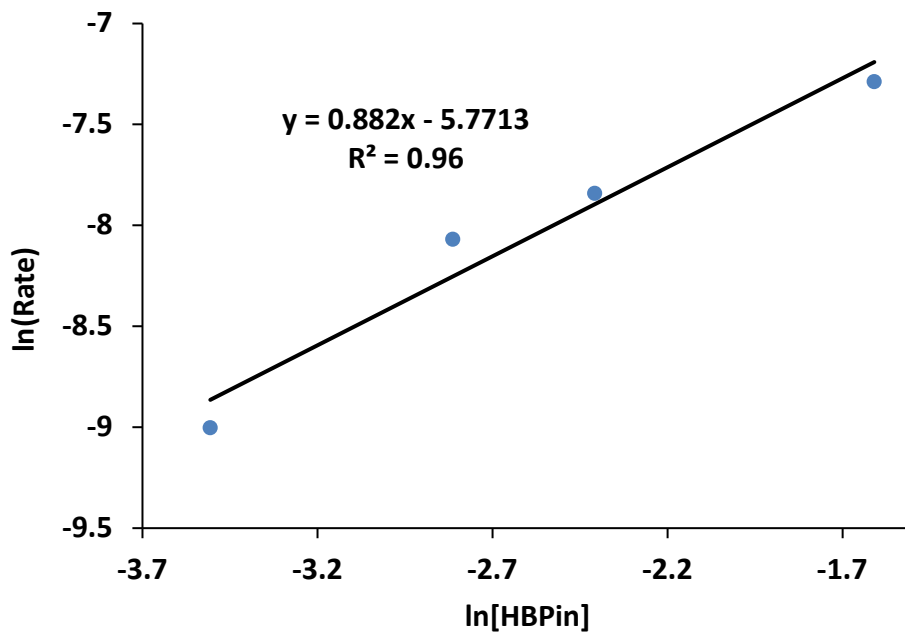

**Figure S56.** Plot of  $\ln(\text{rate})$  vs.  $\ln[\text{HBpin}]$ .



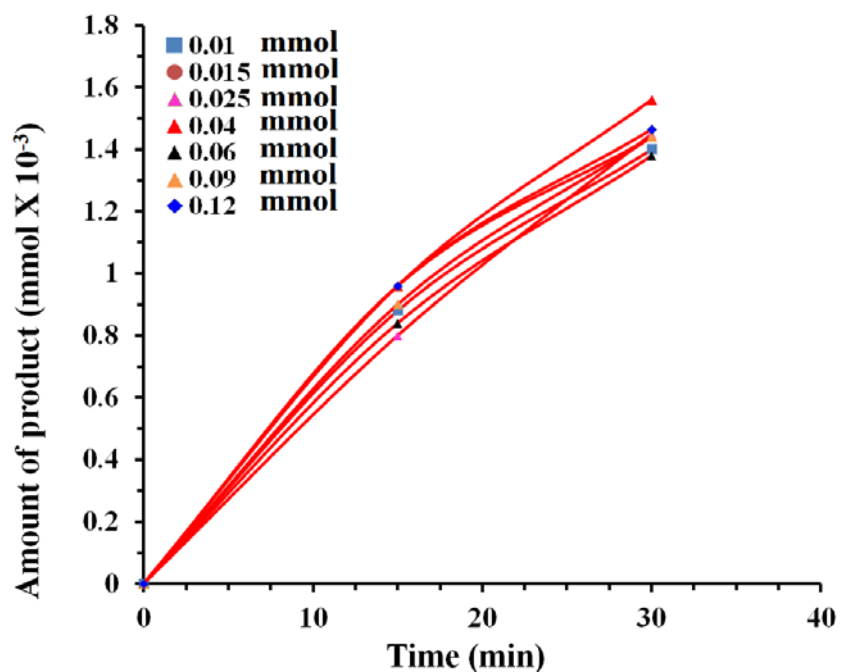

**Figure S57.** Plot of amount of product ( $\times 10^{-3}$  mmol) vs. time in the reaction of different mmol of ethylene carbonate and 0.3 mmol of HBpin catalyzed by 0.0001 mmol of **Th-4** at room temperature.

| [Ethylene Carbonate] (mmol) | Rate (mmol/min) $\times 10^{-3}$ | ln[Ethylene carbonate] | ln(rate) |
|-----------------------------|----------------------------------|------------------------|----------|
| 0.01                        | 0.0491                           | -4.605                 | -2.83532 |
| 0.015                       | 0.0512                           | -4.199                 | -2.74887 |
| 0.025                       | 0.0493                           | -3.688                 | -2.93182 |
| 0.040                       | 0.0544                           | -3.218                 | -2.74887 |
| 0.060                       | 0.048                            | -2.813                 | -2.8824  |
| 0.090                       | 0.0504                           | -2.407                 | -2.81341 |
| 0.120                       | 0.0518                           | -2.120                 | -2.74887 |

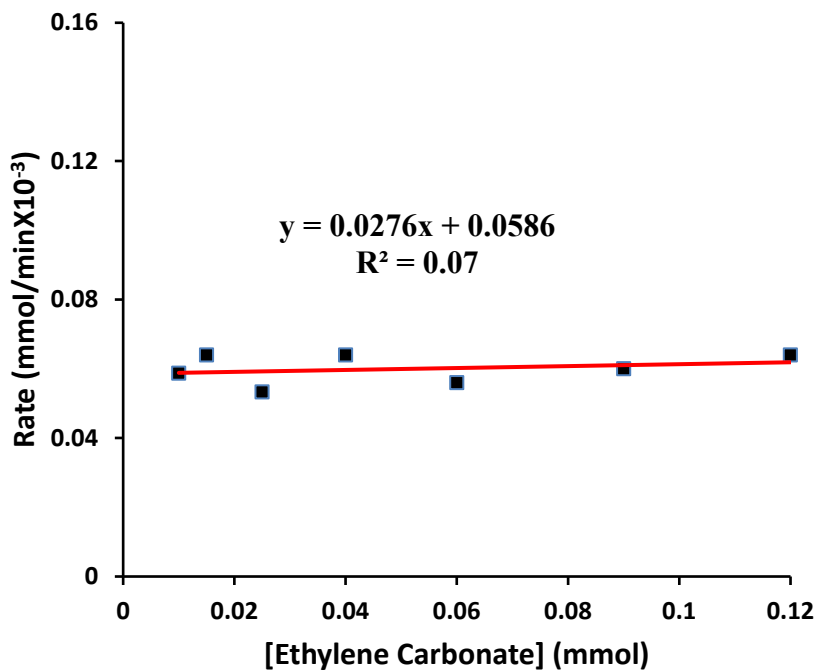

**Figure S58.** Plot of rate ( $\times 10^{-3}$  mmol) vs. Ethylene carbonate amount in the reaction of ethylene carbonate and HBpin catalyzed by **Th-4** at room temperature.

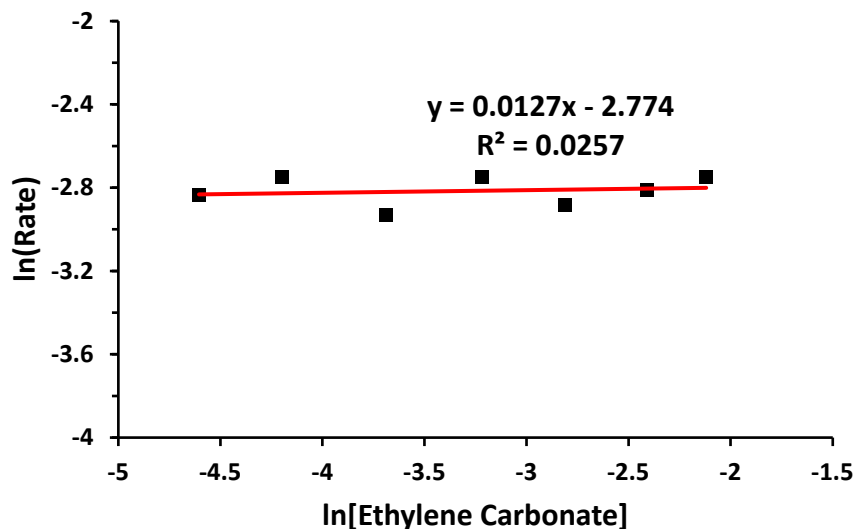

**Figure S59.** Plot of  $\ln(\text{rate})$  vs.  $\ln[\text{Ethylene carbonate}]$ .

## 6. Activation parameters

Activation parameters including enthalpy ( $\Delta H^\ddagger$ ), entropy ( $\Delta S^\ddagger$ ) and activation energy ( $E_a$ ) were calculated from kinetic data using Eyring and Arrhenius plots. Performed in a similar manner as the kinetic experiments. In a typical sample, the J. Young tube was loaded with desired amount

of thorium catalyst (**Th-4**) (0.001 mmol) from stock solution, ethylene carbonate (0.1 mmol), HBpin (0.3 mmol), from stock solution, diluted to final volume of 0.6 mL with C<sub>6</sub>D<sub>6</sub>, and sealed. Then the sample was inserted into Bruker Avance 300 spectrometer, which had been previously set to the desired temperature (40-70 °C). The data was collected at appropriate time intervals. Reaction rates at each temperature were determined by the least square fit of initial product concentration versus time. These data were then plotted as 1/T vs. ln(k/T) from which the enthalpy ( $\Delta H^\ddagger$ ), and the entropy ( $\Delta S^\ddagger$ ) of the transition state could be derived using the Eyring equation. And From a plot of 1/T vs. ln(k), the activation energy can be obtained using the Arrhenius equation. Enthalpy ( $\Delta H^\ddagger$ ), entropy ( $\Delta S^\ddagger$ ) and activation energy ( $E_a$ ) were calculated from the slope and intercept of the least-square fit.

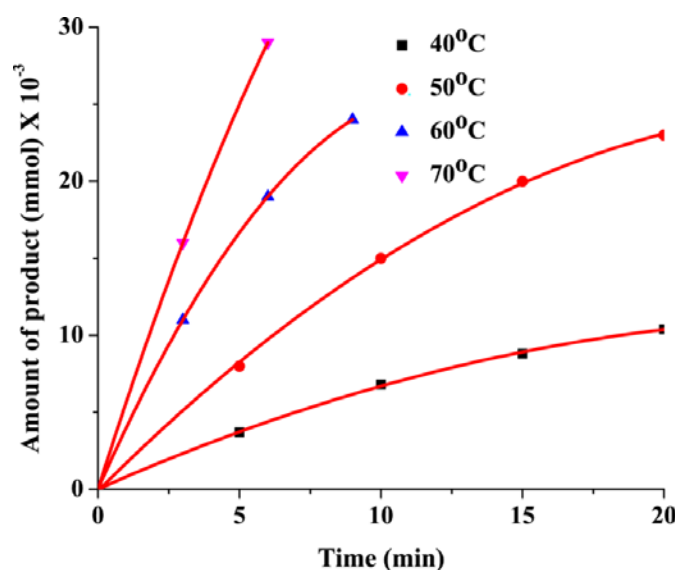

**Figure S60.** Plot of amount of product ( $\times 10^{-3}$  mmol) vs. time (min) in the reaction of 0.1 mmol of ethylene carbonate and 0.3 mmol of HBpin catalyzed by 0.001 mmol **Th-4** at different temperature.

| Temp (K) | Rate (mmol/min)<br>$\times 10^{-3}$ | 1/T      | k/T      | Ln(k)    | ln(k/T)  |
|----------|-------------------------------------|----------|----------|----------|----------|
| 313      | 0.74                                | 0.003195 | 2.36E-06 | -7.20886 | -12.9551 |
| 323      | 1.60                                | 0.003096 | 4.95E-06 | -6.43775 | -12.2154 |
| 333      | 3.10                                | 0.003003 | 9.31E-06 | -5.77635 | -11.5845 |
| 343      | 4.80                                | 0.002915 | 1.4E-05  | -5.33914 | -11.1769 |

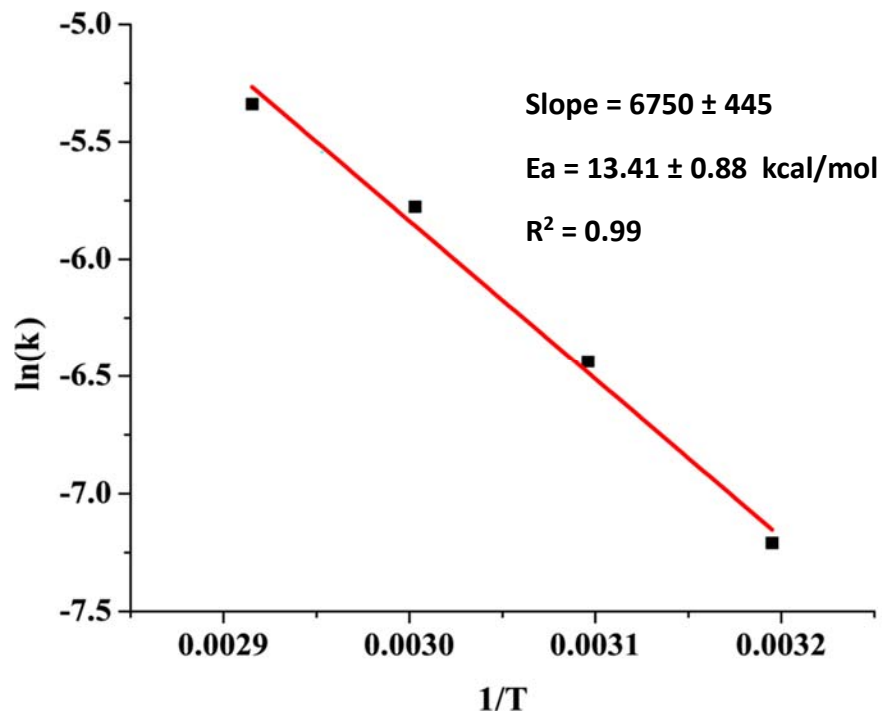

Figure S61. Arrhenius plot.

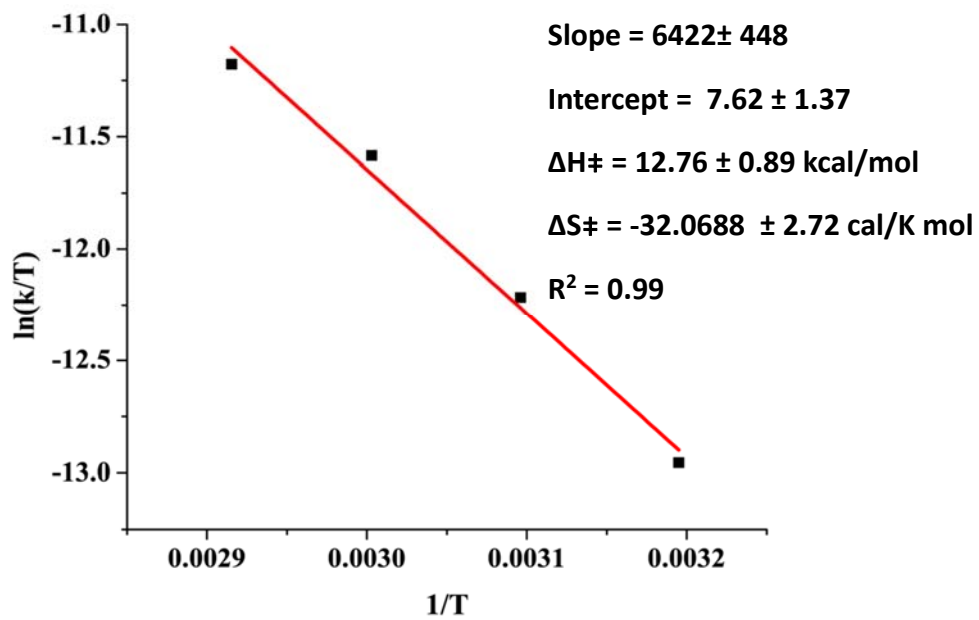

Figure S62. Eyring plot.

## 7. Kinetic Isotope Effect

In a typical sample, the J. Young tube was loaded with desired amount of thorium catalyst (**Th-4**) (0.0005 mmol, 0.5 mol %) from stock solution, ethylene carbonate (0.1 mmol), HBpin or DBpin (0.3 mmol), diluted to final volume of 0.6 mL with  $C_6D_6$ , and sealed. The data was collected early in the reaction (conversion less than 20%). The KIE value was calculated from the ratio ( $k_H/k_D$ ) of the two slopes.

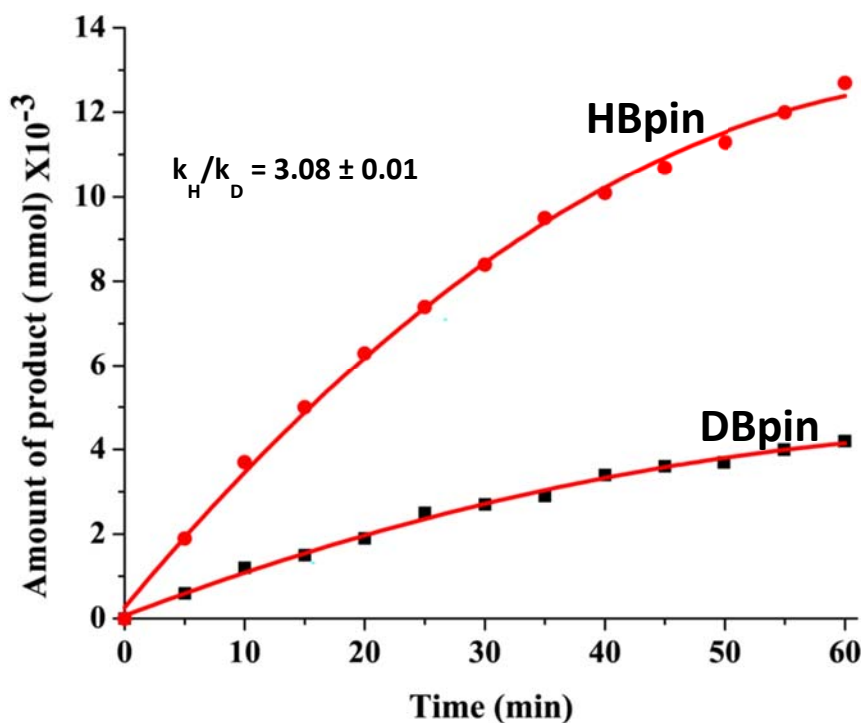

**Figure S63.** Plot of amount of product ( $\times 10^{-3}$  mmol) vs. time (min) in the reaction of 0.1 mmol of ethylene carbonate and 0.3 mmol of HBpin (red dot) and 0.3 mmol of DBpin (black dot) catalyzed by 0.0005 mmol **Th-4** at room temperature.

## 8. Stoichiometric reactions and controlled experiments

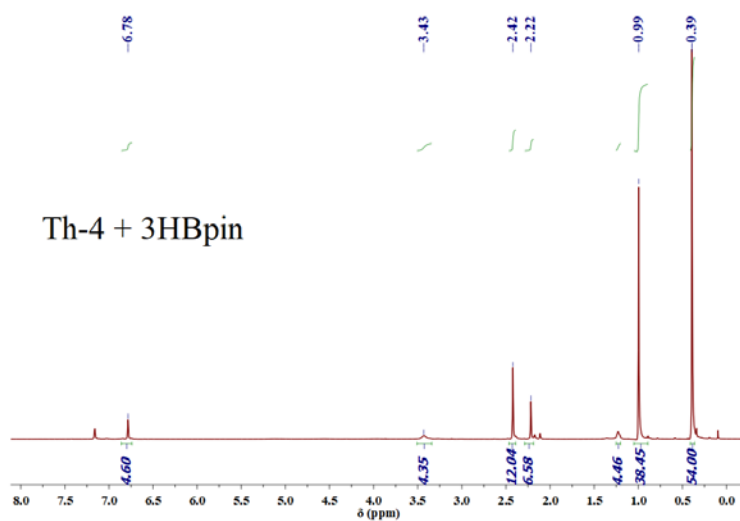

**Figure S64.**  $^1\text{H}$  NMR spectrum **Th-4** + 3 equivalents of HBpin after 5 hours at room temperature in  $\text{C}_6\text{D}_6$ .

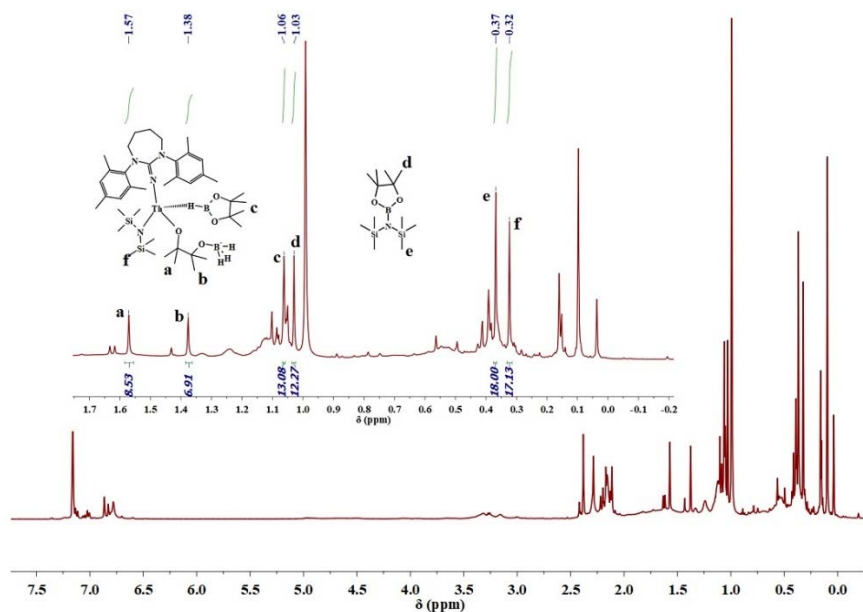

**Figure S65.**  $^1\text{H}$  NMR spectra of catalyst deactivation product obtained from 1:3 mixture of **Th-4** and HBpin in benzene- $d_6$  after heating  $80^\circ\text{C}$  for 1 hour. Expanded portion with relevant peaks labeled are shown in inset.

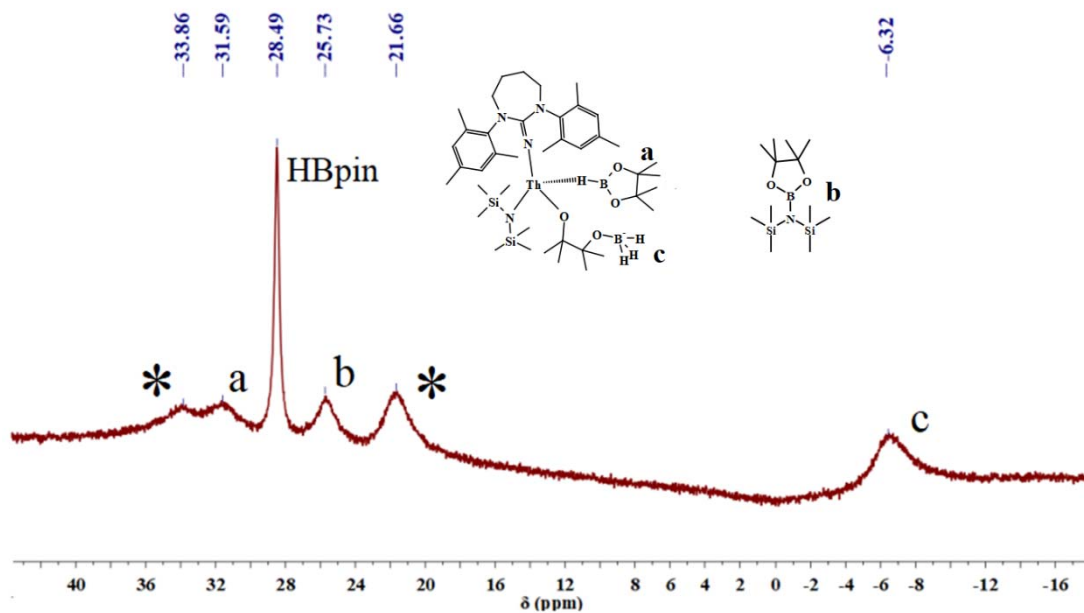

**Figure S66.**  $^{11}\text{B}$  NMR spectra of catalyst deactivation product obtained from 1:3 mixture of **Th-4** and HBpin in benzene- $d_6$  after heating  $80^\circ\text{C}$  for 1 hour. \*indicates unidentified degradation products.

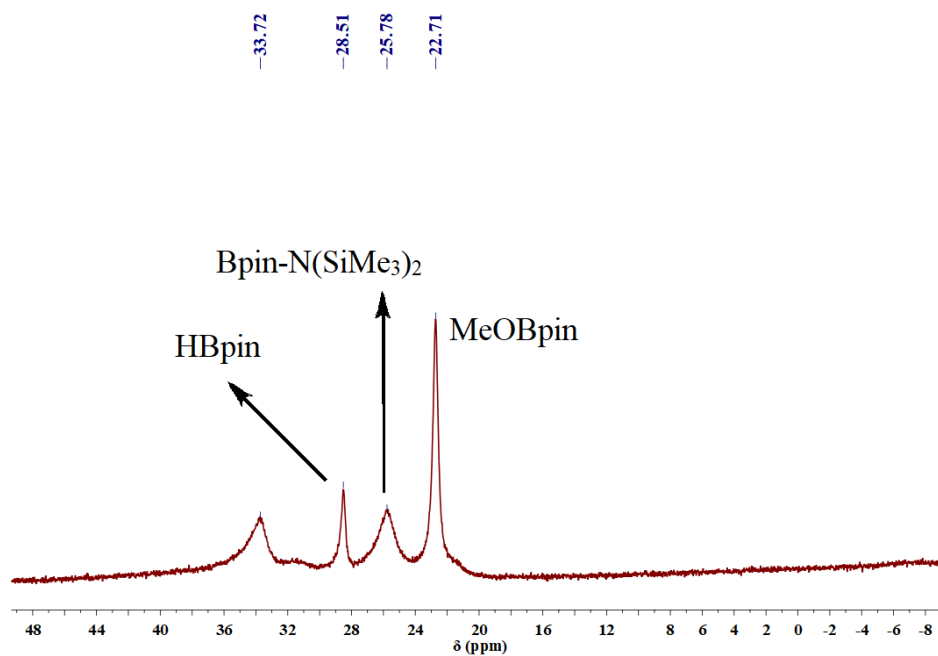

**Figure S67.**  $^{11}\text{B}$  NMR spectra of catalyst deactivation product obtained from 1:3 mixture of **Th-4** and HBpin in benzene- $d_6$  after heating  $80^\circ\text{C}$  for 1 hour and then adding 1 equivalent of dimethyl carbonate.

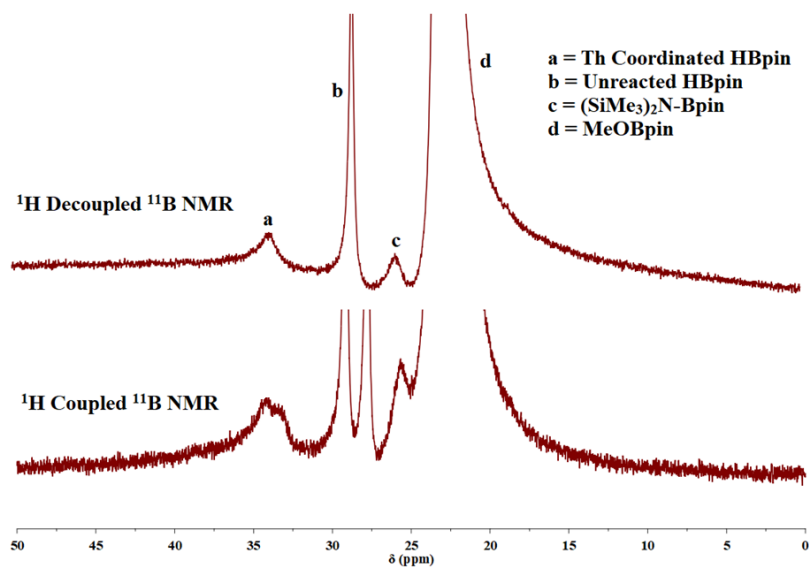

**Figure S68.**  $^{11}\text{B}$  NMR spectra analysis of catalytic reaction of dimethyl carbonate with 3 equivalents of HBpin catalyzed by **Th-4** (1mol%) at  $80^\circ\text{C}$  after complete conversion of dimethyl carbonate to MeOBpin.

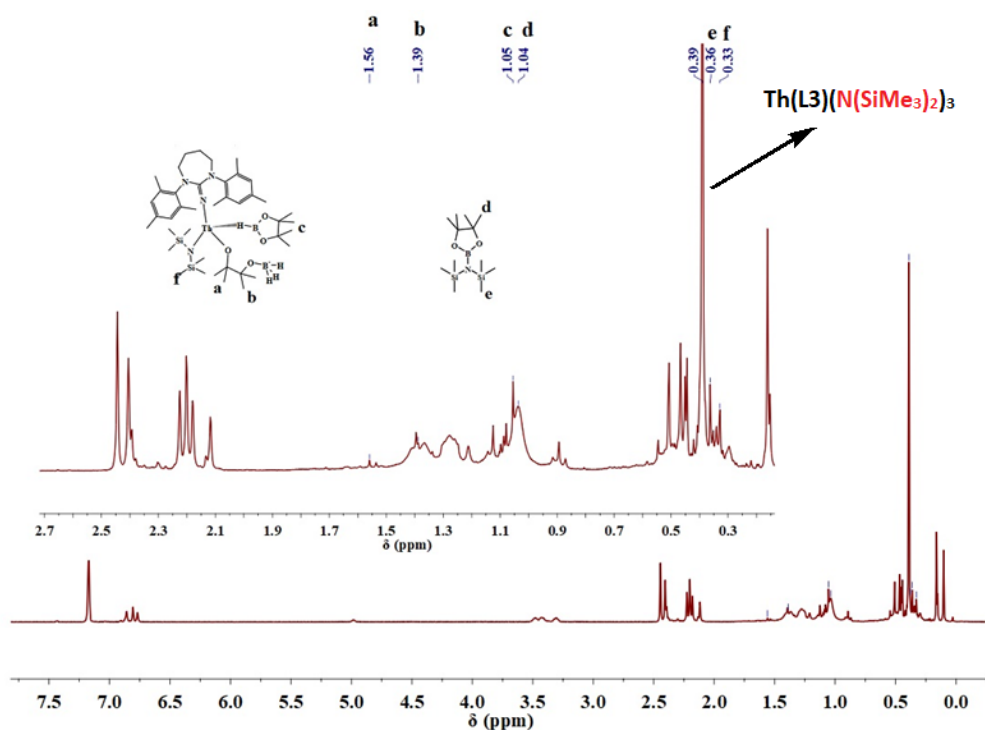

**Figure S69.**  $^1\text{H}$  NMR spectra of catalyst deactivation product obtained from reaction of **Th-4** and 1 equivalent HBpin in benzene- $d_6$  after heating at  $60^\circ\text{C}$  for 1 hour. Expanded portion with relevant peaks labeled are shown in inset (Due to overlap of the peaks of several compounds, integration of the peaks are not taken).



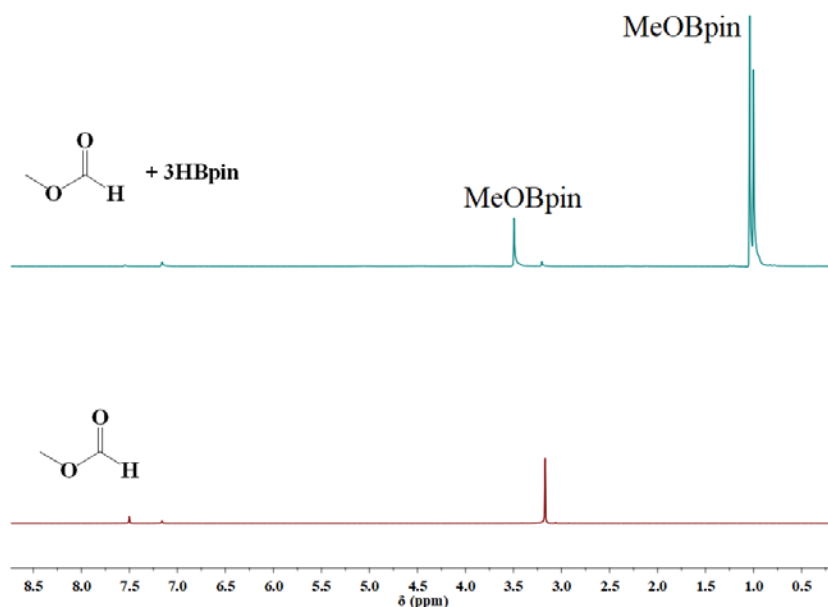

**Figure S70.**  $^1\text{H}$  NMR spectrum of hydroboration of methyl formate catalyzed by **Th-4-H** at room temperature in 10 minutes.

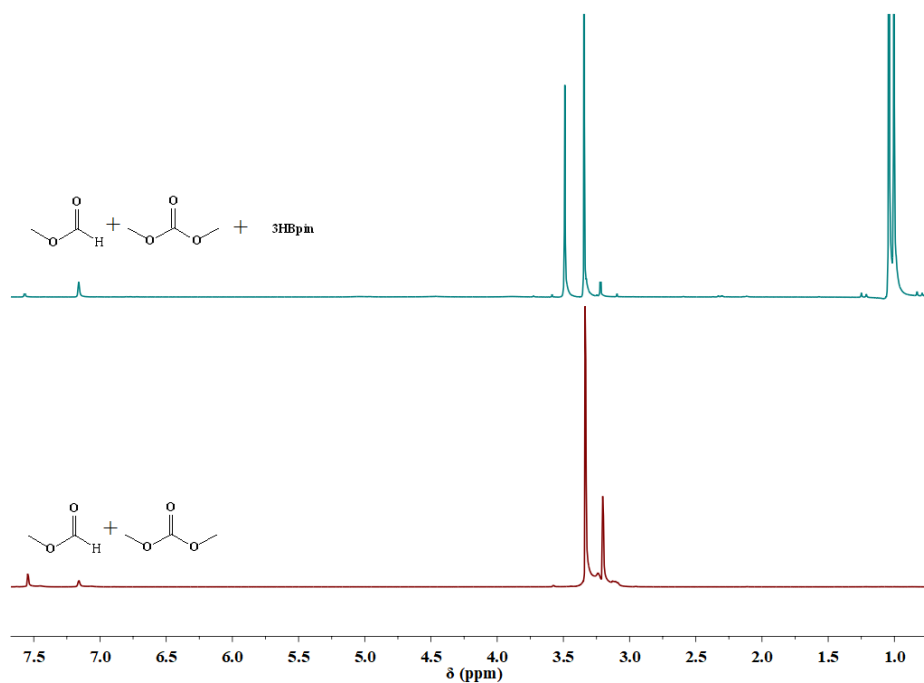

**Figure S71.**  $^1\text{H}$  NMR spectrum of hydroboration of methyl formate in presence of dimethyl carbonate catalyzed by **Th-4-H** at room temperature in 10 minutes.

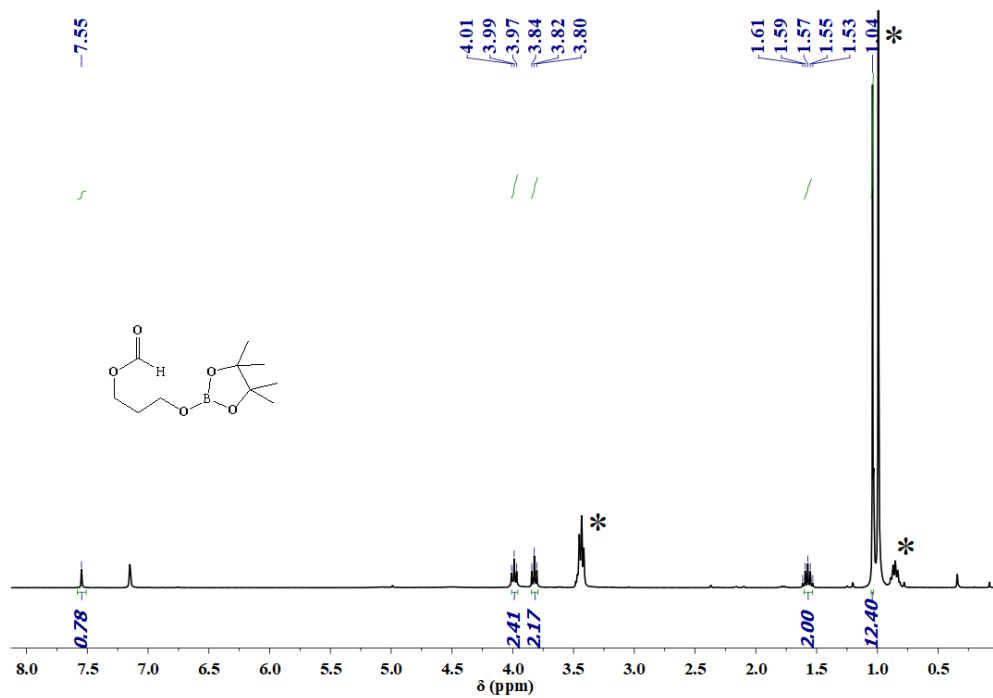

**Figure S72.** <sup>1</sup>H NMR spectrum of formate intermediate formed after 10 minutes of reaction of trimethylene carbonate and 1 equivalent of HBpin catalyzed by **Th-4** at room temperature. \*Indicates the starting materials.

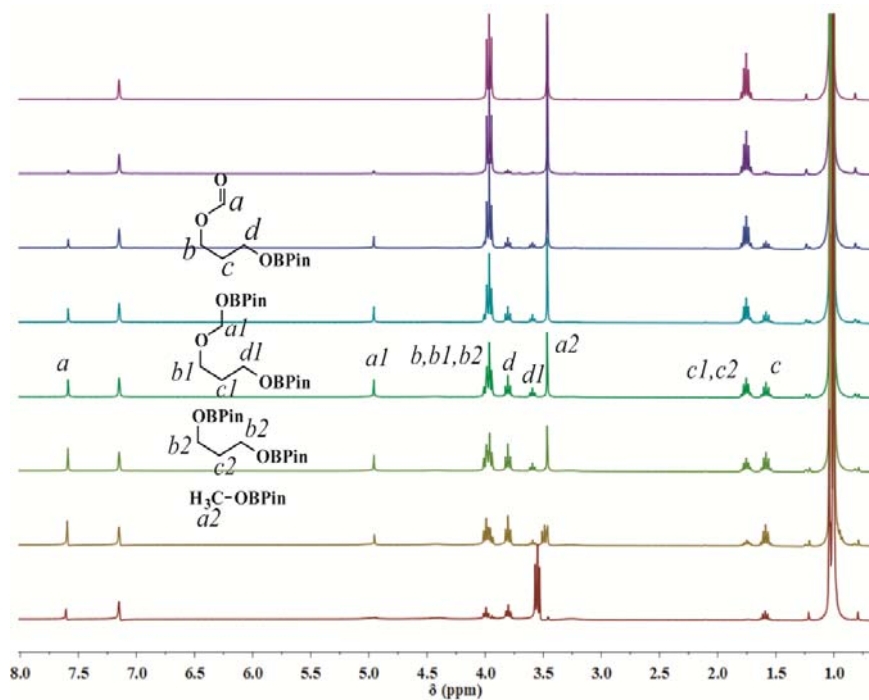

a)

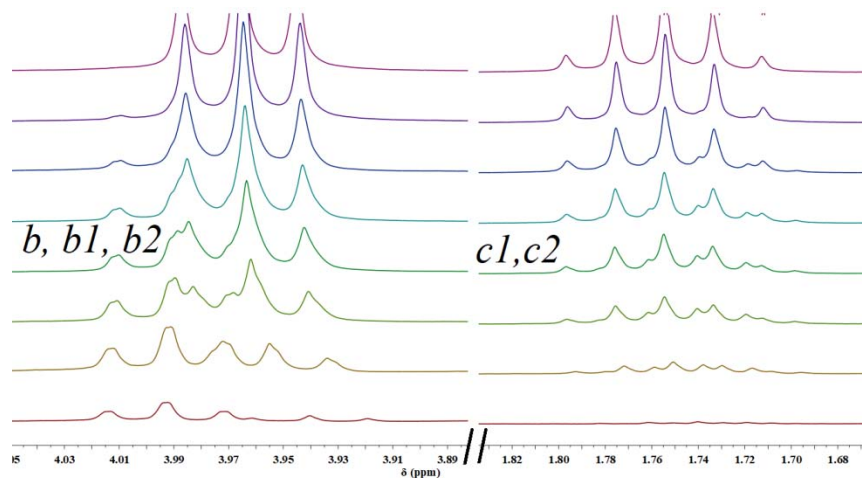

b)

**Figure S73.** (a)  $^1\text{H}$  NMR spectrum studies of reaction of trimethylene carbonate and 4.2 equivalent of HBpin catalyzed by **Th-4** at room temperature. Spectra were recorded after 30 minutes of interval. (b) Expansion of scale to visualize peaks for *b*, *b1*, *b2* and *c1*, *c2*.

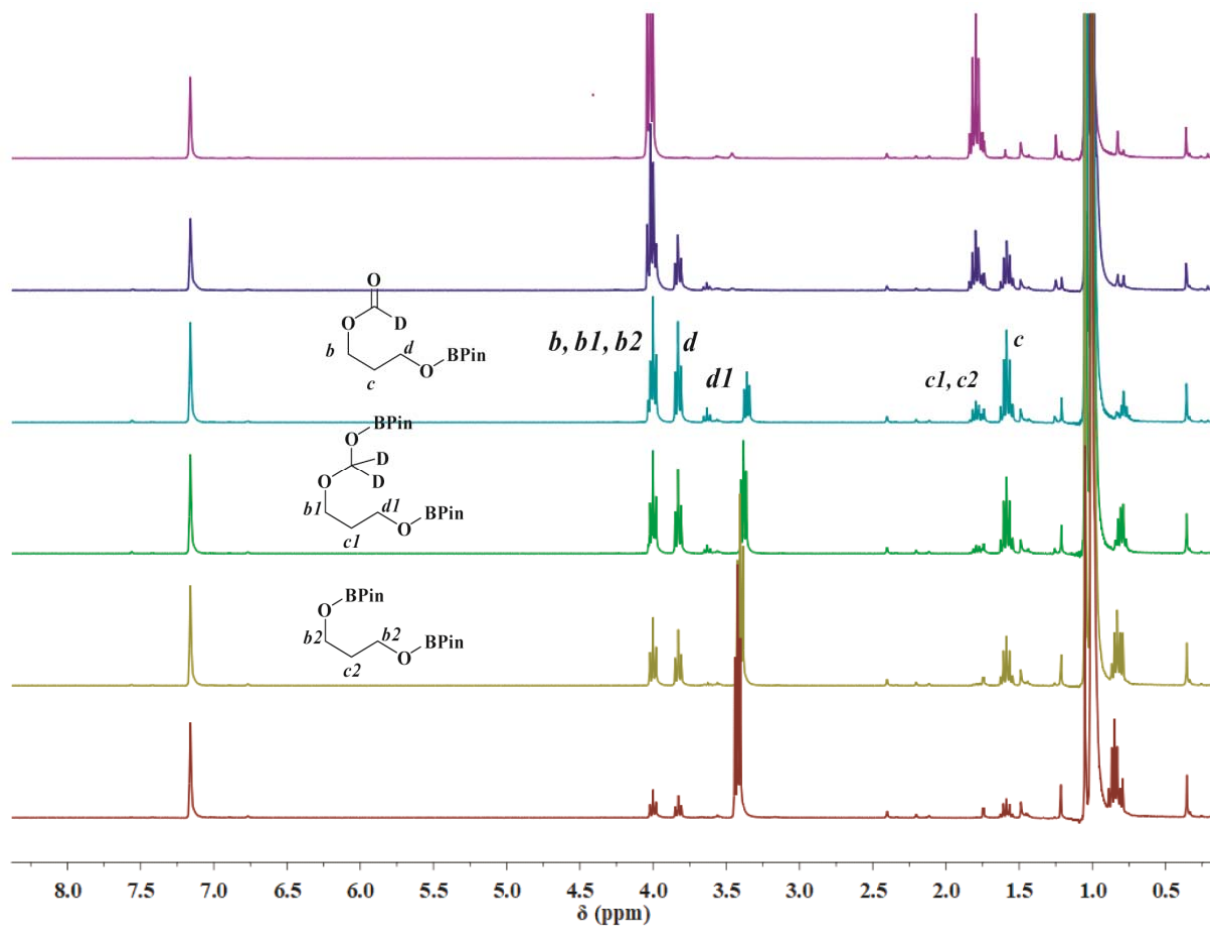

**Figure S74.**  $^1\text{H}$  NMR spectrum studies of reaction of trimethylene carbonate and 4.2 equivalent of DBPin catalyzed by **Th-4** at room temperature. Spectra were recorded after 30 minutes of interval. Starting materials are at the bottom.

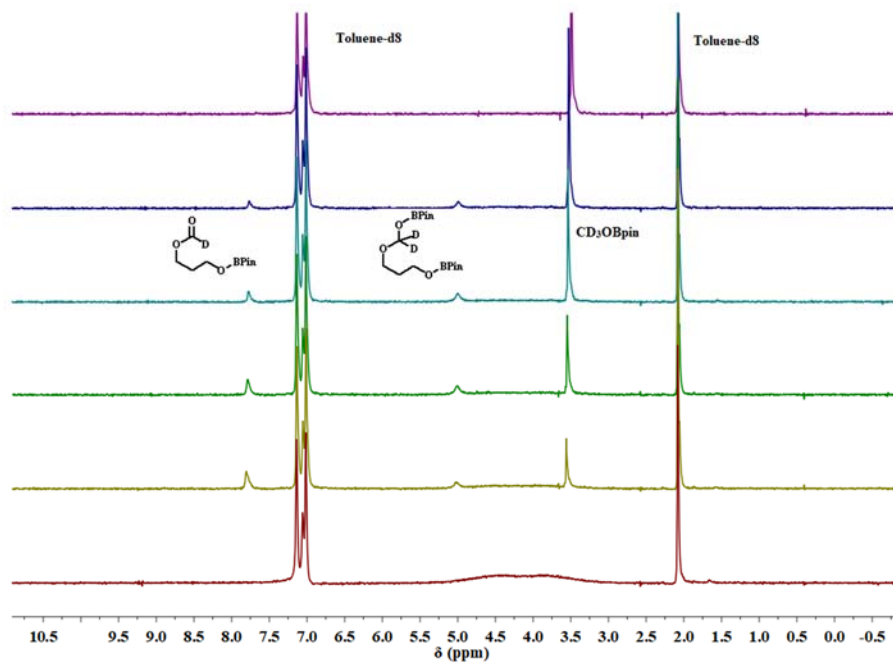

**Figure S75.**  $^2\text{H}$  NMR spectrum studies of reaction of trimethylene carbonate and 4.2 equivalent of DBPin catalyzed by **Th-4** at room temperature. Spectra were recorded after 30 minutes of interval. Starting materials are at the bottom

## Theoretical Study

### 9. Activation alternative mechanism

The activation step mechanism involving the carbonate (S74):

From **Th-4** complex (set as zero free energy) the carbonate coordinates to the metal forming an intermediate at 12.1 kcal/mol (Int-1'). The subsequent metathesis HBpin into Th-N\* bond, from up (mechanism A) or from down (mechanism B), produces (SiMe<sub>3</sub>)<sub>2</sub>N-Bpin with a thorium alkoxide intermediate, Int-2-A, at 8.4 kcal/mol that evolves to the minimum Int-2-B at -43.8 kcal/mol from zero energy stabilized by the interaction of the carbonyl oxygen atom with the metal. However, the two suggested transitions state (TS1' and TS1'') involved in this metathesis step exceed 50 kcal/mol. For this reason, path A and B were ruled out.

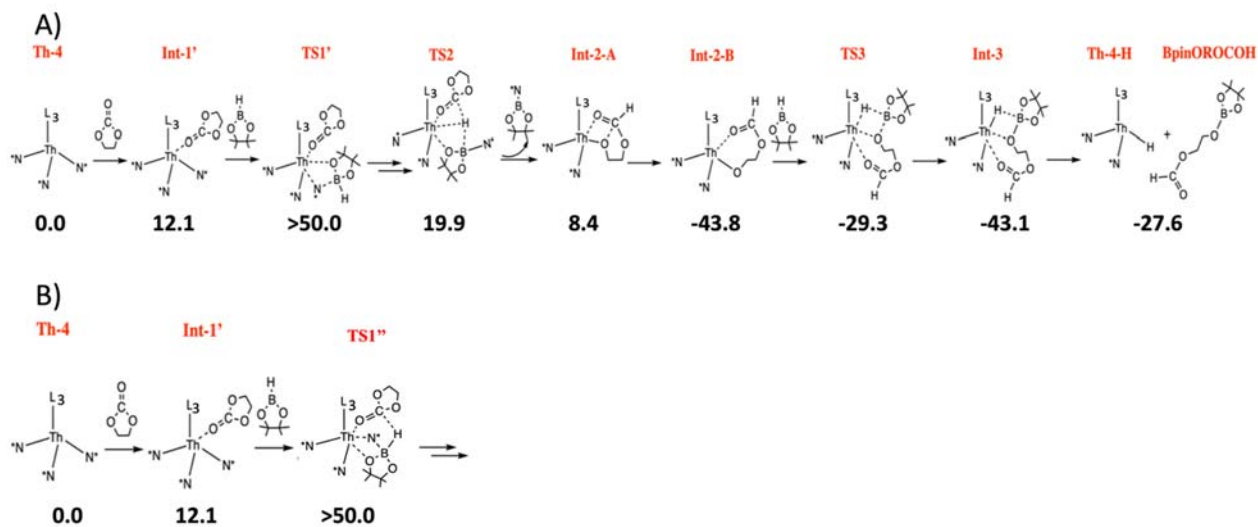

**Figure S76.** Proposed activation mechanisms of **Th-4** catalyst in presence of carbonate. The energy values are  $\Delta G$  in kcal/mol in benzene solvent.

## 10. Deactivation mechanism

The deactivation of **Th-4-H** in presence of carbonate shows an energy barrier of 26 kcal/mol lower than the barrier observed for the deactivation reaction in absence of carbonate and the corresponding reaction product is about 30 kcal/mol more stable. These results, in agreement with the experimental observations, clearly indicate that the carbonate is essential in the reaction mixture to i) avoid the deactivation of the catalyst which otherwise occurs rapidly due to HBpin presence; ii) start the catalytic cycle.

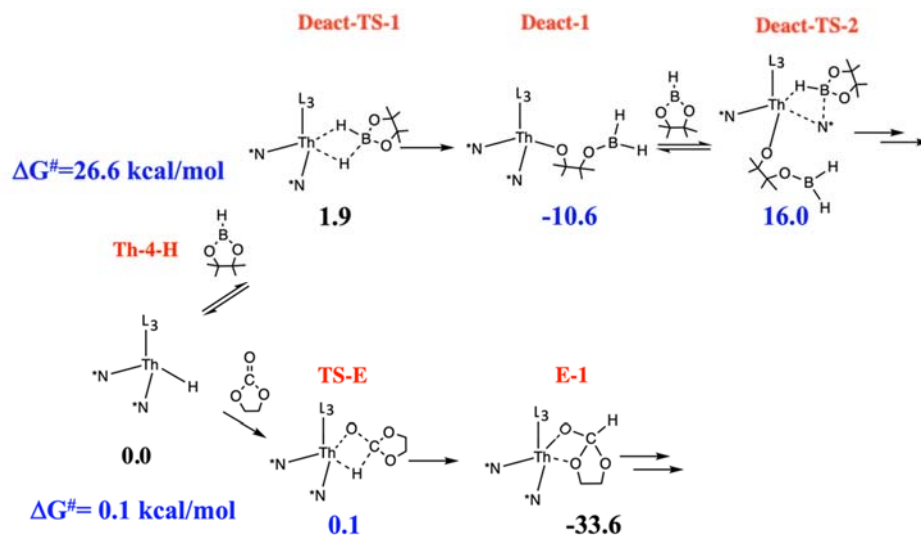

**Figure S77.** Proposed mechanism for the deactivation of the active species **Th-4-H** in absence and presence of carbonate. The energy values are  $\Delta G$  in kcal/mol in benzene solvent.

## 11. Catalytic cycle

Starting from the intermediate **G**, lying at -66.9 kcal/mol, three catalytic cycles have been investigated.

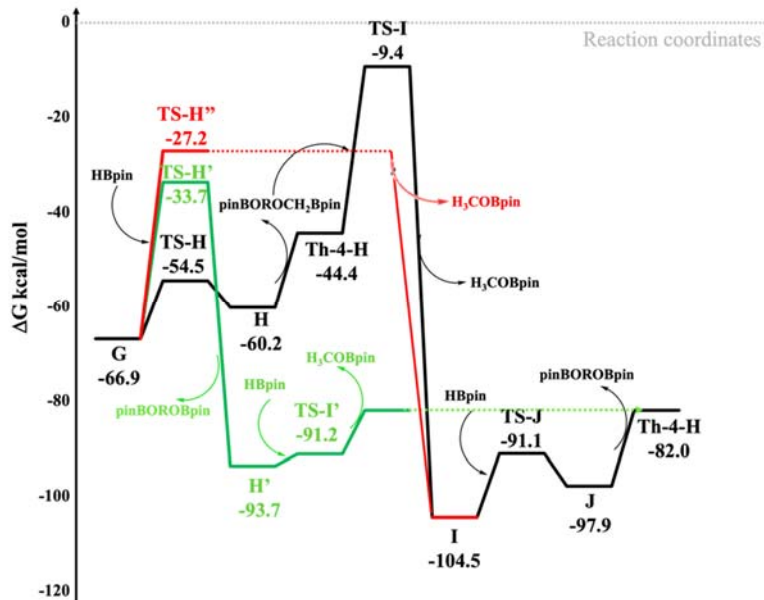

**Figure S78.** Competitive computed reaction pathways from intermediate **G** to **Th-4-H** passing from **TS-H** (black line), **TS-H'** (green line) and **TS-H''** (red line). The Energy values are  $\Delta G$  in kcal/mol in benzene solvent.

A)

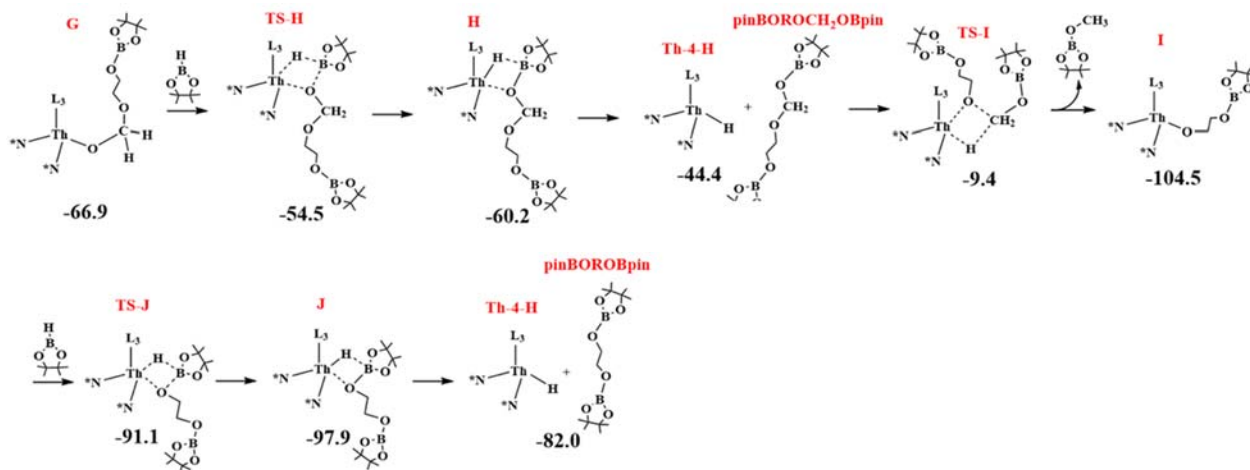



B)

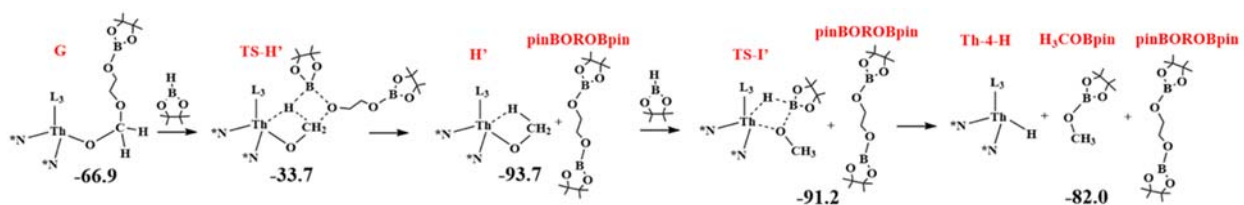

C)

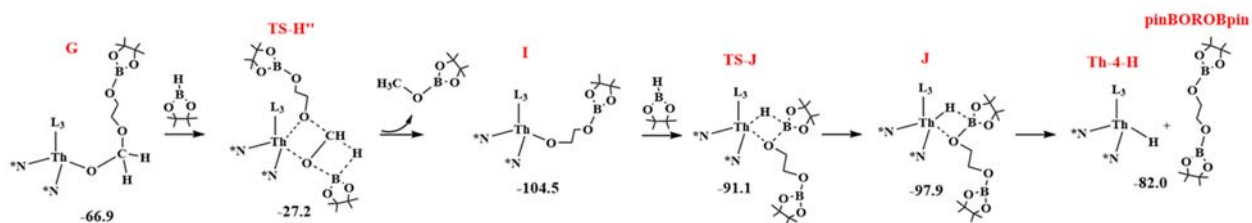

**Scheme S1.** Proposed mechanism for the formation of the active thorium catalyst and the final product pinBOROBpin through A)TS-I, B)TS-H' and C) TS-H''. The energy values are ΔG in kcal/mol in benzene solvent.

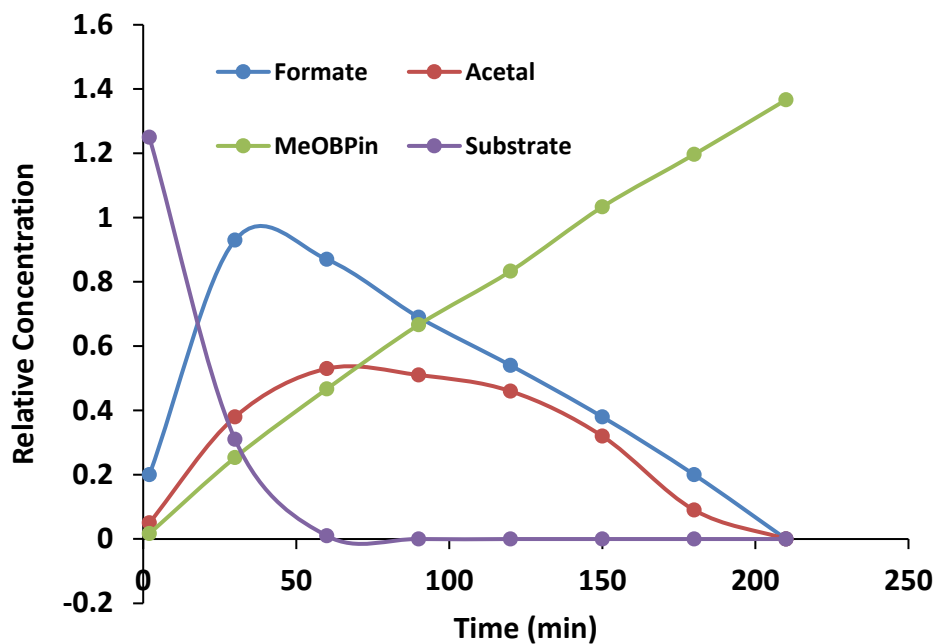

**Figure 79:** Changes of concentration of formate and acetal intermediate with respect to residual solvent peak as internal standard. Data were taken from NMR studies presented in Figure 2.

## 12. XYZ coordinates

### Th-4

|    |           |           |           |
|----|-----------|-----------|-----------|
| Th | -0.783659 | -0.303288 | 0.027546  |
| Si | -2.692901 | 1.868198  | -1.911842 |
| Si | -4.398717 | 0.931731  | 0.382389  |
| Si | -0.658461 | 0.519365  | 3.406536  |
| Si | -0.880649 | -2.502703 | 3.078759  |
| Si | -2.531450 | -3.044811 | -1.545393 |
| Si | 0.206837  | -2.605436 | -2.682449 |
| N  | 1.280127  | 0.636330  | -0.107696 |
| N  | 3.634786  | 0.345812  | 0.361062  |
| N  | 2.852104  | 2.453260  | -0.271871 |
| N  | -2.817237 | 0.881150  | -0.440449 |
| N  | -0.794374 | -0.888657 | 2.323864  |
| N  | -1.009971 | -2.114206 | -1.467597 |
| C  | 2.488971  | 1.108491  | -0.021084 |
| C  | 4.542800  | 0.873945  | 1.405894  |
| H  | 4.929626  | 0.002173  | 1.969417  |
| H  | 3.949848  | 1.481225  | 2.124900  |
| C  | 5.736713  | 1.696147  | 0.902440  |
| H  | 6.308174  | 1.085649  | 0.168731  |
| H  | 6.424940  | 1.882055  | 1.756285  |
| C  | 5.299834  | 3.017123  | 0.271226  |
| H  | 4.943114  | 3.722333  | 1.053667  |
| H  | 6.164306  | 3.512936  | -0.222601 |
| C  | 4.196231  | 2.828322  | -0.780379 |
| H  | 4.064378  | 3.784664  | -1.321586 |
| H  | 4.525660  | 2.077585  | -1.525684 |
| C  | 3.818111  | -1.050410 | 0.031493  |
| C  | 3.544971  | -2.058370 | 0.998847  |
| C  | 3.893872  | -3.395336 | 0.719769  |
| H  | 3.686699  | -4.162944 | 1.484836  |
| C  | 4.493391  | -3.779372 | -0.493963 |
| C  | 4.733785  | -2.770498 | -1.443535 |

|   |           |           |           |
|---|-----------|-----------|-----------|
| H | 5.204068  | -3.038923 | -2.404869 |
| C | 4.420751  | -1.415800 | -1.206482 |
| C | 2.892440  | -1.732553 | 2.317931  |
| H | 3.500010  | -1.047020 | 2.943861  |
| H | 2.734273  | -2.655108 | 2.907831  |
| H | 1.907540  | -1.241917 | 2.170842  |
| C | 4.827023  | -5.225333 | -0.780821 |
| H | 5.110567  | -5.771626 | 0.141872  |
| H | 5.659580  | -5.318337 | -1.507412 |
| H | 3.949918  | -5.753433 | -1.216552 |
| C | 4.785977  | -0.400736 | -2.266519 |
| H | 3.940665  | 0.271422  | -2.515155 |
| H | 5.093683  | -0.908997 | -3.201519 |
| H | 5.635570  | 0.238641  | -1.944321 |
| C | 1.883457  | 3.520278  | -0.378764 |
| C | 1.465081  | 3.952804  | -1.667782 |
| C | 0.684454  | 5.120031  | -1.771960 |
| H | 0.369918  | 5.457357  | -2.774268 |
| C | 0.290745  | 5.862730  | -0.641794 |
| C | 0.707556  | 5.402750  | 0.621576  |
| H | 0.421687  | 5.971914  | 1.522453  |
| C | 1.511466  | 4.254648  | 0.777611  |
| C | 1.895849  | 3.224617  | -2.921671 |
| H | 2.873826  | 3.600062  | -3.296930 |
| H | 1.161854  | 3.371113  | -3.737960 |
| H | 2.009429  | 2.137355  | -2.745612 |
| C | 2.021215  | 3.883396  | 2.151121  |
| H | 1.889893  | 2.807157  | 2.373304  |
| H | 1.494695  | 4.460399  | 2.936640  |
| H | 3.105737  | 4.104263  | 2.251258  |
| C | -4.124514 | 1.716093  | -3.160841 |
| H | -4.315756 | 0.668338  | -3.470252 |
| H | -5.074848 | 2.141799  | -2.777987 |
| C | -1.141473 | 1.265838  | -2.837557 |
| H | -0.193953 | 1.358578  | -2.258369 |
| H | -0.991313 | 1.875646  | -3.752896 |
| H | -1.261469 | 0.210206  | -3.158658 |
| C | -2.497957 | 3.719932  | -1.544431 |
| H | -3.432145 | 4.152126  | -1.133315 |
| H | -2.247270 | 4.275931  | -2.473334 |
| H | -1.684384 | 3.899167  | -0.813231 |
| C | -5.104284 | 2.696481  | 0.579128  |
| H | -4.386091 | 3.380500  | 1.077815  |
| C | -4.298606 | 0.247998  | 2.155735  |
| H | -3.509609 | -0.516149 | 2.303001  |
| H | -5.272028 | -0.202779 | 2.442658  |
| H | -4.094001 | 1.072096  | 2.869737  |
| C | -5.756680 | -0.051560 | -0.527144 |
| H | -5.964543 | 0.351066  | -1.538437 |
| H | -6.700806 | 0.013221  | 0.057248  |
| H | -5.506613 | -1.124790 | -0.638912 |
| C | -1.008414 | 2.084878  | 2.372966  |
| H | -0.311071 | 2.219016  | 1.514173  |
| H | -0.858487 | 2.976486  | 3.017386  |
| H | -2.043584 | 2.133020  | 1.980553  |
| C | 1.069468  | 0.742523  | 4.180607  |
| H | 1.338572  | -0.108155 | 4.838640  |
| H | 1.079706  | 1.662962  | 4.804101  |
| H | 1.865241  | 0.840558  | 3.415687  |
| C | -1.856963 | 0.512682  | 4.887132  |
| H | -2.917291 | 0.404020  | 4.587145  |
| H | -1.753251 | 1.471313  | 5.440803  |
| H | -1.619196 | -0.303261 | 5.601001  |
| C | -2.635015 | -2.950835 | 3.677389  |

|   |           |           |           |
|---|-----------|-----------|-----------|
| H | -2.955513 | -2.272143 | 4.495230  |
| H | -2.634084 | -3.984935 | 4.086661  |
| H | -3.405436 | -2.903962 | 2.884111  |
| C | 0.184813  | -2.713993 | 4.651140  |
| H | 1.257096  | -2.483263 | 4.497090  |
| H | 0.114968  | -3.777540 | 4.968989  |
| H | -0.179475 | -2.099347 | 5.500336  |
| C | -0.259821 | -3.802109 | 1.833517  |
| H | -0.622854 | -3.623022 | 0.800168  |
| H | -0.577515 | -4.823128 | 2.134256  |
| H | 0.848971  | -3.797121 | 1.785726  |
| C | -0.517852 | -3.014829 | -4.403016 |
| H | -1.209409 | -3.880651 | -4.422443 |
| H | 0.331643  | -3.255858 | -5.079100 |
| H | -1.048305 | -2.142802 | -4.840007 |
| C | 1.199558  | -4.111481 | -2.087812 |
| H | 1.738529  | -3.872838 | -1.147544 |
| H | 1.957083  | -4.401079 | -2.847655 |
| H | 0.551495  | -4.990626 | -1.898691 |
| C | 1.438045  | -1.205894 | -3.042125 |
| H | 0.984896  | -0.420664 | -3.680237 |
| H | 2.304496  | -1.632193 | -3.589729 |
| H | 1.818834  | -0.727070 | -2.118714 |
| C | -3.702445 | -2.413667 | -2.902450 |
| H | -3.950334 | -1.346597 | -2.731614 |
| H | -4.653752 | -2.988129 | -2.892685 |
| H | -3.261743 | -2.505758 | -3.915130 |
| C | -3.449746 | -2.937821 | 0.115562  |
| H | -2.973575 | -3.596999 | 0.866692  |
| H | -4.494160 | -3.292092 | -0.018148 |
| H | -3.519511 | -1.919489 | 0.548853  |
| C | -2.292591 | -4.920994 | -1.806613 |
| H | -1.827829 | -5.186702 | -2.777490 |
| H | -3.292234 | -5.407051 | -1.774244 |
| H | -1.678473 | -5.369443 | -0.997868 |
| C | -0.580807 | 7.089836  | -0.782116 |
| H | -0.508479 | 7.749009  | 0.106335  |
| H | -0.308333 | 7.685873  | -1.677420 |
| H | -1.649584 | 6.802889  | -0.896107 |
| H | -6.014712 | 2.643463  | 1.215632  |
| H | -5.405435 | 3.158060  | -0.384158 |
| H | -3.853184 | 2.291857  | -4.072810 |

E(solv)= -4086.81214488 A.U  
Thermal correction= 1.022026

Act-TS1

|    |           |           |           |
|----|-----------|-----------|-----------|
| Th | -0.739747 | 0.114314  | -0.595894 |
| N  | -1.524221 | -2.229510 | 0.064689  |
| N  | -0.652312 | 0.860145  | -2.861425 |
| N  | -2.630642 | 1.385814  | 0.030887  |
| Si | -2.740019 | 2.323209  | 1.550936  |
| Si | -1.065665 | 0.112800  | -4.428870 |
| Si | -0.349796 | -3.361991 | -0.698317 |
| Si | -3.200624 | -2.894785 | 0.232971  |
| Si | -4.050708 | 1.618355  | -1.036271 |
| Si | 0.084952  | 2.483404  | -2.993499 |
| C  | -3.245647 | -4.518772 | 1.230550  |
| H  | -3.009913 | -4.343984 | 2.297744  |
| H  | -4.273321 | -4.939878 | 1.178804  |
| H  | -2.551843 | -5.292439 | 0.841106  |

|   |           |           |           |
|---|-----------|-----------|-----------|
| C | -4.391826 | -1.678536 | 1.065575  |
| H | -4.375511 | -1.804573 | 2.163953  |
| H | -4.111850 | -0.627612 | 0.856485  |
| H | -5.426319 | -1.849500 | 0.700283  |
| C | -4.002225 | -3.388831 | -1.437210 |
| H | -3.784458 | -2.702923 | -2.278597 |
| H | -3.710672 | -4.410159 | -1.750900 |
| H | -5.105206 | -3.392880 | -1.297039 |
| C | 0.691116  | -4.424859 | 0.473283  |
| H | 0.068410  | -5.189374 | 0.980302  |
| H | 1.453384  | -4.957016 | -0.134573 |
| H | 1.207008  | -3.825483 | 1.244910  |
| C | -1.028358 | -4.630811 | -1.950158 |
| H | -1.637823 | -5.423886 | -1.470115 |
| H | -1.616260 | -4.192219 | -2.778017 |
| H | -0.138840 | -5.130072 | -2.394459 |
| C | 0.847004  | -2.263281 | -1.686971 |
| C | -0.593885 | 3.628498  | -4.360011 |
| C | 1.956209  | 2.393258  | -3.317213 |
| H | 2.417577  | 3.403492  | -3.282146 |
| H | 2.438245  | 1.755363  | -2.550967 |
| H | 2.177421  | 1.958964  | -4.313325 |
| C | 0.403681  | 0.102598  | -5.647469 |
| H | 1.302511  | -0.368106 | -5.197102 |
| H | 0.128465  | -0.486213 | -6.549527 |
| H | 0.686879  | 1.118893  | -5.991984 |
| C | -2.515616 | 0.950371  | -5.343072 |
| H | -2.289974 | 1.988096  | -5.656066 |
| H | -2.737103 | 0.366109  | -6.263044 |
| H | -3.439488 | 0.973675  | -4.731775 |
| C | -1.572306 | -1.719160 | -4.260686 |
| H | -2.170619 | -1.995197 | -5.155152 |
| H | -0.697212 | -2.399002 | -4.232889 |
| H | -2.200667 | -1.940294 | -3.374360 |
| C | -4.313812 | 0.117609  | -2.167090 |
| H | -4.702159 | -0.745569 | -1.594590 |
| H | -5.070665 | 0.371607  | -2.939693 |
| H | -3.401987 | -0.201858 | -2.707452 |
| C | -3.907460 | 3.153101  | -2.150912 |
| H | -3.044241 | 3.064918  | -2.838997 |
| H | -4.824018 | 3.248811  | -2.772362 |
| H | -3.793340 | 4.092228  | -1.572473 |
| C | -5.719908 | 1.783627  | -0.121044 |
| H | -5.798720 | 2.681468  | 0.524125  |
| H | -6.516038 | 1.861984  | -0.893544 |
| H | -5.943476 | 0.892229  | 0.499242  |
| C | -3.894898 | 1.543322  | 2.846342  |
| O | 0.164158  | -2.183797 | 2.721116  |
| C | -0.220363 | -2.818949 | 3.980128  |
| C | -1.611286 | -2.113551 | 4.304860  |
| O | -2.076205 | -1.691198 | 2.991447  |
| C | 0.888585  | -2.536691 | 5.002709  |
| H | 1.823970  | -3.039027 | 4.683329  |
| H | 1.100040  | -1.455707 | 5.099511  |
| C | -0.335438 | -4.336840 | 3.777700  |
| H | -0.591373 | -4.845266 | 4.729497  |
| H | -1.101562 | -4.597032 | 3.024226  |
| H | 0.635679  | -4.739488 | 3.429204  |
| C | -2.666132 | -3.022699 | 4.943538  |
| H | -3.605193 | -2.452830 | 5.094417  |
| H | -2.900676 | -3.902078 | 4.315374  |
| H | -2.324554 | -3.383188 | 5.935910  |
| B | -0.951877 | -1.542705 | 2.170528  |
| H | -0.725461 | -0.432578 | 1.684635  |

|   |           |           |           |
|---|-----------|-----------|-----------|
| H | -2.424785 | -0.305906 | 5.190119  |
| C | -1.454831 | -0.840879 | 5.158818  |
| H | -0.703995 | -0.150369 | 4.726046  |
| H | -1.156280 | -1.077034 | 6.200311  |
| H | 0.615334  | -2.935205 | 6.001845  |
| H | 1.652993  | -2.900603 | -2.105105 |
| H | 0.380876  | -1.755150 | -2.557259 |
| H | 1.390914  | -1.500724 | -1.082549 |
| N | 1.391621  | 0.605869  | 0.096444  |
| C | 2.667506  | 0.837517  | 0.202377  |
| N | 3.254148  | 1.742413  | 1.117119  |
| N | 3.654208  | 0.239991  | -0.666024 |
| C | 4.729937  | 1.115360  | -1.177029 |
| C | 6.051143  | 0.941596  | -0.420236 |
| C | 5.750990  | 0.864804  | 1.080089  |
| H | 6.583143  | 0.025559  | -0.754004 |
| H | 6.717707  | 1.801282  | -0.655051 |
| C | 4.688099  | 1.870994  | 1.538467  |
| H | 5.458368  | -0.166648 | 1.356315  |
| H | 6.664161  | 1.087851  | 1.673307  |
| C | 2.504421  | 2.758555  | 1.827553  |
| C | 3.845100  | -1.170943 | -0.833821 |
| C | -1.050797 | 2.442429  | 2.387354  |
| C | -3.271925 | 4.140615  | 1.293141  |
| C | 2.102264  | 2.516451  | 3.167774  |
| C | 1.604108  | 3.589286  | 3.930745  |
| C | 1.468347  | 4.887383  | 3.401848  |
| C | 1.866199  | 5.096682  | 2.068316  |
| C | 2.410477  | 4.063875  | 1.276575  |
| C | 2.200833  | 1.137506  | 3.773527  |
| H | 1.298760  | 3.398188  | 4.973650  |
| C | 0.882941  | 6.008846  | 4.230243  |
| H | 1.782446  | 6.107238  | 1.633398  |
| C | 2.947538  | 4.384006  | -0.099396 |
| H | -0.228188 | 6.008232  | 4.173214  |
| H | 1.152281  | 5.909807  | 5.301824  |
| H | 1.226555  | 7.002588  | 3.878164  |
| H | 2.664644  | 3.622474  | -0.850205 |
| H | 2.577963  | 5.367390  | -0.450952 |
| H | 4.059338  | 4.441644  | -0.094233 |
| H | 1.791345  | 1.130758  | 4.802947  |
| H | 1.645480  | 0.392819  | 3.166704  |
| H | 3.251002  | 0.777453  | 3.834538  |
| H | -0.074403 | 4.606192  | -4.254569 |
| H | -0.381146 | 3.254481  | -5.382430 |
| H | -1.682357 | 3.820499  | -4.279912 |
| H | -3.272785 | 4.650451  | 2.281362  |
| H | -2.554557 | 4.681697  | 0.641112  |
| H | -4.285872 | 4.260815  | 0.861277  |
| H | -3.846134 | 2.143458  | 3.781457  |
| H | -4.955527 | 1.494995  | 2.532052  |
| H | -3.557810 | 0.512269  | 3.078494  |
| H | -1.178479 | 3.003500  | 3.336808  |
| H | -0.614758 | 1.458852  | 2.649204  |
| H | -0.305362 | 2.993183  | 1.781801  |
| C | 4.157214  | -1.693996 | -2.130410 |
| C | 4.531709  | -3.046416 | -2.261576 |
| C | 4.574036  | -3.933164 | -1.172018 |
| C | 4.178007  | -3.421646 | 0.076463  |
| C | 3.812560  | -2.074921 | 0.277747  |
| C | 4.019817  | -0.887838 | -3.403964 |
| H | 4.774353  | -3.422584 | -3.270635 |
| C | 5.029400  | -5.366351 | -1.331843 |
| H | 4.158679  | -4.094467 | 0.950457  |

|   |           |           |           |
|---|-----------|-----------|-----------|
| C | 3.343885  | -1.685510 | 1.659033  |
| H | 4.863551  | -5.736298 | -2.364312 |
| H | 6.117205  | -5.469552 | -1.120228 |
| H | 4.499116  | -6.046695 | -0.634244 |
| H | 3.242381  | -0.105791 | -3.312383 |
| H | 4.965969  | -0.386130 | -3.707409 |
| H | 3.737435  | -1.554356 | -4.243943 |
| H | 3.735385  | -2.396187 | 2.414307  |
| H | 3.649508  | -0.668622 | 1.957187  |
| H | 2.235602  | -1.704492 | 1.736768  |
| C | -0.192965 | 3.432169  | -1.367553 |
| H | 0.301685  | 4.422491  | -1.452725 |
| H | -1.270551 | 3.604149  | -1.183495 |
| H | 0.242405  | 2.947509  | -0.466364 |
| H | 4.371150  | 2.156329  | -1.075534 |
| H | 4.869901  | 0.955893  | -2.262464 |
| H | 5.028273  | 2.894359  | 1.250843  |
| H | 4.676711  | 1.873454  | 2.650361  |

E(solv)= -4498.64315818 A.U

Thermal correction= 1.199451

Act-1

|    |           |           |           |
|----|-----------|-----------|-----------|
| Th | -0.715784 | 1.064034  | 0.119070  |
| N  | -1.161899 | 0.795935  | 2.402726  |
| N  | -2.832004 | 1.678981  | -0.729140 |
| N  | 0.692097  | 2.322711  | -1.070214 |
| C  | 1.448718  | 3.083834  | -1.813813 |
| N  | 1.934902  | 2.695198  | -3.078179 |
| C  | 3.312493  | 3.027114  | -3.521108 |
| C  | 3.492977  | 4.379855  | -4.218250 |
| C  | 3.310440  | 5.542931  | -3.246930 |
| C  | 1.980297  | 5.460184  | -2.484821 |
| N  | 1.865860  | 4.393304  | -1.462226 |
| C  | 1.820690  | 0.368252  | -3.931682 |
| C  | 2.928361  | -0.094623 | -3.016216 |
| C  | 1.286392  | -0.540306 | -4.871501 |
| C  | 0.227998  | -0.197504 | -5.730129 |
| C  | -0.304155 | -1.172855 | -6.756974 |
| C  | -0.316895 | 1.098887  | -5.616248 |
| C  | 0.192501  | 2.047826  | -4.710570 |
| C  | -0.397708 | 3.437660  | -4.668089 |
| C  | 2.042922  | 4.805255  | -0.092328 |
| C  | 1.214361  | 5.815563  | 0.476996  |
| C  | 0.066671  | 6.456080  | -0.273730 |
| C  | 1.484813  | 6.261371  | 1.787978  |
| C  | 2.541566  | 5.747008  | 2.559019  |
| C  | 2.789725  | 6.219570  | 3.973771  |
| C  | 3.347241  | 4.751908  | 1.972196  |
| C  | 3.125948  | 4.273099  | 0.667185  |
| C  | 4.055897  | 3.227445  | 0.098617  |
| H  | 3.997725  | 2.973299  | -2.648904 |
| H  | 3.616411  | 2.220219  | -4.214440 |
| H  | 4.508434  | 4.406559  | -4.670582 |
| H  | 2.771640  | 4.459341  | -5.061568 |
| H  | 4.147595  | 5.572819  | -2.514216 |
| H  | 3.336889  | 6.512312  | -3.791387 |
| H  | 1.827400  | 6.419699  | -1.960093 |
| H  | 1.144152  | 5.352707  | -3.207971 |
| H  | -0.727000 | 6.777386  | 0.429352  |
| H  | -0.385512 | 5.772053  | -1.016602 |
| H  | 0.389249  | 7.369852  | -0.820896 |
| H  | 0.835460  | 7.041824  | 2.220312  |

|    |           |           |           |
|----|-----------|-----------|-----------|
| H  | 3.874244  | 6.282927  | 4.199300  |
| H  | 2.341101  | 7.216386  | 4.158200  |
| H  | 2.345401  | 5.516977  | 4.712844  |
| H  | 4.191052  | 4.334113  | 2.547391  |
| H  | 4.627030  | 3.623329  | -0.767957 |
| H  | 4.790616  | 2.898798  | 0.859042  |
| H  | 3.505441  | 2.329710  | -0.252212 |
| H  | 2.569477  | -0.907176 | -2.345445 |
| H  | 3.300344  | 0.711361  | -2.358359 |
| H  | 3.788084  | -0.498492 | -3.592501 |
| H  | 1.711572  | -1.556749 | -4.919185 |
| H  | 0.039450  | -2.207184 | -6.556069 |
| H  | 0.036990  | -0.903066 | -7.780749 |
| H  | -1.413936 | -1.177193 | -6.780118 |
| H  | -1.156596 | 1.390729  | -6.269211 |
| H  | 0.328561  | 4.201634  | -5.018933 |
| H  | -1.294537 | 3.507285  | -5.314068 |
| H  | -0.697714 | 3.723210  | -3.638464 |
| Si | 0.311839  | 1.065434  | 3.359219  |
| Si | -2.683910 | 0.467817  | 3.275399  |
| C  | 1.621454  | 1.566939  | 2.067593  |
| C  | 0.983247  | -0.443381 | 4.277888  |
| C  | 0.165013  | 2.506083  | 4.596791  |
| C  | -3.964191 | -0.288922 | 2.102365  |
| C  | -2.486702 | -0.741686 | 4.731118  |
| C  | -3.437675 | 2.051651  | 4.026796  |
| H  | 1.962371  | -0.183371 | 4.737174  |
| H  | 0.313831  | -0.781665 | 5.093046  |
| H  | 1.140551  | -1.283917 | 3.569290  |
| H  | 1.833550  | 0.755736  | 1.333354  |
| H  | 2.585569  | 1.745281  | 2.586336  |
| H  | 1.404273  | 2.509307  | 1.518968  |
| H  | -0.516808 | 2.257669  | 5.437076  |
| H  | 1.163291  | 2.718881  | 5.037577  |
| H  | -0.203503 | 3.437674  | 4.119486  |
| H  | -2.011242 | -1.695864 | 4.425444  |
| H  | -1.898324 | -0.314479 | 5.569470  |
| H  | -3.497139 | -0.980964 | 5.128494  |
| H  | -3.628800 | -1.276259 | 1.721589  |
| H  | -4.923676 | -0.448542 | 2.638459  |
| H  | -4.157765 | 0.366369  | 1.230262  |
| H  | -4.406679 | 1.805603  | 4.513548  |
| H  | -2.779791 | 2.492425  | 4.803845  |
| H  | -3.637035 | 2.837193  | 3.270937  |
| Si | -3.126882 | 3.356361  | -0.216581 |
| Si | -4.030768 | 0.987378  | -1.867881 |
| C  | -4.734636 | 3.668815  | 0.754592  |
| C  | -3.078974 | 4.596564  | -1.657452 |
| C  | -1.710606 | 3.824804  | 0.984234  |
| C  | -3.421253 | 1.137645  | -3.660166 |
| C  | -4.462414 | -0.822536 | -1.477827 |
| C  | -5.738806 | 1.843015  | -1.845862 |
| H  | -4.982699 | 2.833779  | 1.439903  |
| H  | -4.616039 | 4.586707  | 1.370303  |
| H  | -5.601703 | 3.829042  | 0.084394  |
| H  | -4.144089 | 0.665190  | -4.359784 |
| H  | -2.430781 | 0.667132  | -3.819086 |
| H  | -3.328381 | 2.207582  | -3.942113 |
| H  | -2.124185 | 4.515812  | -2.216616 |
| H  | -3.904204 | 4.421642  | -2.378042 |
| H  | -3.177699 | 5.638464  | -1.284072 |
| H  | -1.870063 | 4.880543  | 1.284670  |
| H  | -0.687845 | 3.805093  | 0.539511  |
| H  | -1.717804 | 3.228399  | 1.919853  |



|    |           |           |           |
|----|-----------|-----------|-----------|
| H  | -5.047325 | -1.241074 | -2.325155 |
| H  | -3.595105 | -1.490724 | -1.319794 |
| H  | -5.097285 | -0.882915 | -0.570490 |
| H  | -6.243317 | 1.761370  | -0.861676 |
| H  | -6.374980 | 1.312612  | -2.587952 |
| H  | -5.721460 | 2.912390  | -2.140171 |
| N  | -0.187422 | -3.149294 | 0.015192  |
| Si | -0.645508 | -3.098535 | -1.691871 |
| H  | 0.656847  | -4.179710 | 3.170198  |
| C  | -2.291951 | -3.961603 | -2.102066 |
| C  | -0.854541 | -1.244399 | -2.141095 |
| C  | 0.576598  | -3.869474 | -2.926251 |
| C  | -2.793917 | -4.319392 | 1.154746  |
| C  | -0.415191 | -3.993891 | 2.974458  |
| C  | -0.350624 | -6.104459 | 0.749608  |
| H  | -3.168306 | -3.591027 | -1.536855 |
| H  | -2.225446 | -5.059185 | -1.946377 |
| H  | -2.495030 | -3.800826 | -3.183455 |
| H  | 0.743233  | -4.941812 | -2.690808 |
| H  | 0.162813  | -3.810581 | -3.956394 |
| H  | 1.553837  | -3.353174 | -2.893840 |
| H  | -0.883072 | -6.833016 | 1.399056  |
| H  | -0.577278 | -6.369388 | -0.305033 |
| H  | 0.738702  | -6.253362 | 0.905212  |
| H  | 0.096108  | -0.688867 | -1.990681 |
| H  | -1.162652 | -1.073103 | -3.191533 |
| H  | -1.679830 | -0.839244 | -1.509071 |
| H  | -3.207177 | -3.288654 | 1.157133  |
| H  | -3.151056 | -4.821751 | 2.079766  |
| H  | -3.236757 | -4.860634 | 0.295948  |
| H  | -1.024966 | -4.659142 | 3.623927  |
| H  | -0.621759 | -2.943188 | 3.261189  |
| Si | -0.882498 | -4.319889 | 1.167677  |
| B  | 1.032309  | -2.256769 | 0.334649  |
| O  | 2.100450  | -2.241933 | -0.683093 |
| C  | 3.246239  | -2.925865 | -0.140447 |
| C  | 3.115696  | -2.623108 | 1.412417  |
| O  | 1.695518  | -2.506437 | 1.599384  |
| C  | 3.150539  | -4.434604 | -0.454353 |
| C  | 4.526257  | -2.375906 | -0.787652 |
| C  | 3.636188  | -3.741255 | 2.329824  |
| C  | 3.805134  | -1.300966 | 1.804009  |
| H  | 2.246481  | -4.885492 | -0.002880 |
| H  | 3.086271  | -4.576553 | -1.551275 |
| H  | 4.041389  | -4.988319 | -0.092017 |
| H  | 3.082392  | -4.686774 | 2.176616  |
| H  | 3.509574  | -3.443606 | 3.391277  |
| H  | 4.716545  | -3.933712 | 2.158838  |
| H  | 5.428479  | -2.815911 | -0.312722 |
| H  | 4.552209  | -2.643690 | -1.863894 |
| H  | 4.591443  | -1.274440 | -0.710060 |
| H  | 3.500403  | -1.020061 | 2.831452  |
| H  | 3.516456  | -0.479613 | 1.120279  |
| H  | 4.911033  | -1.392310 | 1.785850  |
| H  | 0.541383  | -0.936160 | 0.330504  |
| C  | 1.280537  | 1.678664  | -3.872077 |

E(solv)= -4498.65367133 A.U

Thermal correction= 1.194220

HBpin

|   |           |           |           |
|---|-----------|-----------|-----------|
| C | -0.795163 | -0.190019 | 0.045653  |
| C | 0.795085  | -0.190946 | -0.045578 |

|   |           |           |           |
|---|-----------|-----------|-----------|
| C | -1.379714 | -1.071920 | 1.151114  |
| C | -1.484055 | -0.492946 | -1.295235 |
| C | 1.482519  | -0.493168 | 1.296009  |
| C | 1.378834  | -1.074539 | -1.150377 |
| B | 0.001563  | 1.954099  | -0.000514 |
| H | 0.002524  | 3.163361  | -0.000418 |
| O | 1.094736  | 1.206945  | -0.362944 |
| O | -1.093083 | 1.208750  | 0.361406  |
| H | 2.483991  | -0.985049 | -1.153939 |
| H | 1.122969  | -2.141128 | -0.982332 |
| H | 1.012735  | -0.776621 | -2.150908 |
| H | 2.564492  | -0.270119 | 1.203749  |
| H | 1.075442  | 0.137360  | 2.111909  |
| H | 1.370406  | -1.557663 | 1.585044  |
| H | -2.484997 | -0.983361 | 1.153831  |
| H | -1.123004 | -2.138364 | 0.984006  |
| H | -1.014712 | -0.772955 | 2.151657  |
| H | -1.073419 | 0.132548  | -2.113137 |
| H | -1.377774 | -1.558985 | -1.580927 |
| H | -2.564727 | -0.263859 | -1.203176 |

E(solv)= -411.853822590 A.U  
 Thermal correction= 0.15045

\*N-Bpin

|    |           |           |           |
|----|-----------|-----------|-----------|
| C  | 2.660092  | -0.779854 | 0.083786  |
| O  | 1.280182  | -1.045571 | 0.458026  |
| B  | 0.495639  | 0.009961  | -0.011390 |
| O  | 1.283499  | 1.064004  | -0.475804 |
| C  | 2.659166  | 0.800649  | -0.084651 |
| N  | -0.941343 | 0.004146  | -0.013616 |
| C  | 3.587700  | 1.336086  | -1.178336 |
| C  | 2.915950  | 1.542924  | 1.238203  |
| C  | 2.936773  | -1.520116 | -1.236302 |
| C  | 3.575342  | -1.313419 | 1.189434  |
| H  | 4.646029  | 1.081436  | -0.962360 |
| H  | 3.322580  | 0.932181  | -2.173687 |
| H  | 3.507285  | 2.440975  | -1.229807 |
| H  | 3.968853  | 1.440628  | 1.570745  |
| H  | 2.701362  | 2.621294  | 1.097412  |
| H  | 2.255592  | 1.166440  | 2.045366  |
| H  | 4.636409  | -1.061093 | 0.984481  |
| H  | 3.299517  | -0.906523 | 2.180718  |
| H  | 3.492491  | -2.418070 | 1.242708  |
| H  | 3.995085  | -1.418581 | -1.551857 |
| H  | 2.719500  | -2.598759 | -1.102104 |
| H  | 2.290654  | -1.141536 | -2.053964 |
| Si | -1.829977 | 1.571244  | -0.014323 |
| Si | -1.790470 | -1.585945 | 0.011326  |
| C  | -3.328677 | 1.469732  | 1.152714  |
| C  | -0.761254 | 2.981798  | 0.660307  |
| C  | -2.392013 | 2.013565  | -1.770052 |
| C  | -3.396866 | -1.489868 | -1.001198 |
| C  | -0.753971 | -2.938783 | -0.815955 |
| C  | -2.176068 | -2.097485 | 1.795535  |
| H  | -2.659997 | -3.097273 | 1.826922  |
| H  | -1.238521 | -2.153246 | 2.387414  |
| H  | -2.853466 | -1.375968 | 2.297326  |
| H  | -3.887402 | -2.486953 | -0.980064 |
| H  | -4.134484 | -0.753097 | -0.626896 |
| H  | -3.181704 | -1.249745 | -2.063682 |
| H  | -1.369066 | -3.860043 | -0.906676 |
| H  | -0.440608 | -2.640725 | -1.838630 |

|   |           |           |           |
|---|-----------|-----------|-----------|
| H | 0.155704  | -3.174235 | -0.231648 |
| H | -2.903671 | 2.999835  | -1.785809 |
| H | -1.515360 | 2.073890  | -2.448809 |
| H | -3.092636 | 1.261139  | -2.186016 |
| H | -1.394415 | 3.888787  | 0.769637  |
| H | -0.346915 | 2.737323  | 1.660732  |
| H | 0.084950  | 3.216343  | -0.012907 |
| H | -3.843362 | 2.454806  | 1.158468  |
| H | -4.083369 | 0.707153  | 0.875545  |
| H | -3.000058 | 1.261768  | 2.192968  |

E(solv)= -1284.63804095 A.U

Thermal correction= 0.343173

Th-4-H

|    |           |          |          |
|----|-----------|----------|----------|
| Th | 2.916333  | 3.960747 | 6.958350 |
| Si | -0.045104 | 2.205883 | 6.379626 |
| Si | -0.456054 | 5.036955 | 7.623315 |
| Si | 3.842714  | 1.716028 | 9.429730 |
| Si | 5.647089  | 1.531129 | 6.926238 |
| N  | 3.619641  | 5.048924 | 5.171657 |
| N  | 5.002576  | 6.847540 | 4.448174 |
| N  | 3.678209  | 5.697854 | 2.876542 |
| N  | 0.579561  | 3.742207 | 6.989798 |
| H  | 3.355517  | 5.465858 | 8.393543 |
| N  | 4.253620  | 2.216243 | 7.779868 |
| C  | 4.067913  | 5.814623 | 4.224264 |
| C  | 4.856939  | 8.167581 | 3.794270 |
| H  | 5.334424  | 8.904968 | 4.468102 |
| H  | 3.778124  | 8.434817 | 3.739801 |
| C  | 5.481269  | 8.291464 | 2.397432 |
| H  | 6.553578  | 7.999987 | 2.452933 |
| H  | 5.462559  | 9.363105 | 2.100379 |
| C  | 4.756719  | 7.443031 | 1.351734 |
| H  | 3.742736  | 7.855548 | 1.152544 |
| H  | 5.304905  | 7.480066 | 0.384749 |
| C  | 4.621702  | 5.971272 | 1.770200 |
| H  | 4.262132  | 5.389040 | 0.900888 |
| H  | 5.622955  | 5.568597 | 2.038955 |
| C  | 5.824107  | 6.803389 | 5.636834 |
| C  | 5.435277  | 7.500395 | 6.809588 |
| C  | 6.303320  | 7.490514 | 7.921405 |
| H  | 5.992410  | 8.023944 | 8.835297 |
| C  | 7.534483  | 6.812785 | 7.906348 |
| C  | 7.890846  | 6.122784 | 6.728842 |
| H  | 8.855953  | 5.589729 | 6.687439 |
| C  | 7.060613  | 6.102761 | 5.592118 |
| C  | 4.133249  | 8.262065 | 6.890733 |
| H  | 4.252378  | 9.319851 | 6.565457 |
| H  | 3.755337  | 8.274027 | 7.931211 |
| H  | 3.353287  | 7.801005 | 6.255537 |
| C  | 8.437032  | 6.791476 | 9.120139 |
| H  | 8.179673  | 7.597646 | 9.835965 |
| H  | 9.504286  | 6.908240 | 8.838411 |
| H  | 8.350631  | 5.825587 | 9.664676 |
| C  | 7.503242  | 5.361155 | 4.351133 |
| H  | 6.785682  | 4.562409 | 4.068656 |
| H  | 8.490488  | 4.883564 | 4.507614 |
| H  | 7.588977  | 6.039161 | 3.476077 |
| C  | 2.444302  | 5.037285 | 2.526644 |
| C  | 2.461857  | 3.741586 | 1.945067 |
| C  | 1.248081  | 3.188375 | 1.482869 |
| H  | 1.267973  | 2.186271 | 1.021218 |

|   |           |           |           |
|---|-----------|-----------|-----------|
| C | 0.021834  | 3.867068  | 1.592964  |
| C | 0.028489  | 5.130692  | 2.220471  |
| H | -0.920771 | 5.681571  | 2.333904  |
| C | 1.212322  | 5.730990  | 2.687265  |
| C | 3.740830  | 2.948163  | 1.796548  |
| H | 4.251860  | 3.151985  | 0.829274  |
| H | 3.531962  | 1.859958  | 1.822771  |
| H | 4.460650  | 3.179817  | 2.604858  |
| C | 1.162550  | 7.099176  | 3.324857  |
| H | 1.600660  | 7.084326  | 4.344967  |
| H | 0.119188  | 7.461440  | 3.407411  |
| H | 1.735661  | 7.847538  | 2.737216  |
| C | -0.864321 | 1.147515  | 7.732384  |
| H | -0.180960 | 0.964605  | 8.587833  |
| H | -1.772854 | 1.647272  | 8.130853  |
| C | 1.441184  | 1.237753  | 5.659600  |
| H | 1.862823  | 1.751975  | 4.766790  |
| H | 1.086235  | 0.244663  | 5.309250  |
| H | 2.268976  | 1.039252  | 6.376414  |
| C | -1.277973 | 2.374796  | 4.944384  |
| H | -2.256372 | 2.782816  | 5.267822  |
| H | -1.462481 | 1.377859  | 4.488591  |
| H | -0.865643 | 3.041579  | 4.159151  |
| C | -2.085280 | 5.271911  | 6.665268  |
| H | -1.913738 | 5.389420  | 5.575308  |
| C | 0.507921  | 6.672857  | 7.509542  |
| H | 1.496698  | 6.611794  | 8.018459  |
| H | -0.064863 | 7.491136  | 7.995959  |
| H | 0.681540  | 6.968031  | 6.452947  |
| C | -0.917791 | 4.760017  | 9.449203  |
| H | -1.445627 | 3.794757  | 9.599579  |
| H | -1.588939 | 5.570015  | 9.808844  |
| H | -0.017088 | 4.755609  | 10.097700 |
| C | 5.818042  | -0.355307 | 7.126066  |
| H | 6.054515  | -0.649077 | 8.170294  |
| H | 6.647715  | -0.724059 | 6.484476  |
| H | 4.892549  | -0.887727 | 6.822524  |
| C | 7.284495  | 2.321728  | 7.480642  |
| H | 7.261393  | 3.423475  | 7.343346  |
| H | 8.138236  | 1.919508  | 6.892969  |
| H | 7.490137  | 2.122577  | 8.552799  |
| C | 5.422936  | 1.876074  | 5.067456  |
| H | 4.571975  | 1.299337  | 4.647930  |
| H | 6.335521  | 1.587058  | 4.503700  |
| H | 5.231749  | 2.952766  | 4.864179  |
| C | 3.152418  | -0.054828 | 9.536050  |
| H | 2.301319  | -0.199227 | 8.837876  |
| H | 2.782988  | -0.261285 | 10.564060 |
| H | 3.917536  | -0.820549 | 9.295526  |
| C | 2.461244  | 2.882296  | 10.038052 |
| H | 2.773707  | 3.951594  | 10.027427 |
| H | 2.201081  | 2.626794  | 11.087095 |
| H | 1.518768  | 2.790559  | 9.453721  |
| C | 5.301216  | 1.859184  | 10.639943 |
| H | 6.121368  | 1.154728  | 10.386425 |
| H | 4.969905  | 1.623401  | 11.674357 |
| H | 5.720658  | 2.886732  | 10.639042 |
| C | -1.264540 | 3.266819  | 1.070645  |
| H | -1.785720 | 3.964191  | 0.380808  |
| H | -1.081165 | 2.320843  | 0.523085  |
| H | -1.971782 | 3.043424  | 1.898447  |
| H | -2.592243 | 6.190695  | 7.032595  |
| H | -2.789094 | 4.426159  | 6.813470  |
| H | -1.178435 | 0.160115  | 7.329994  |

E(solv)= -3214.014899 A.U  
Thermal correction= 0.813312

Deact-TS-1

|    |           |           |           |
|----|-----------|-----------|-----------|
| Th | -0.247411 | -0.540151 | 0.399109  |
| N  | -0.402414 | -2.678366 | -0.521612 |
| N  | -0.042344 | -0.410289 | 2.734309  |
| N  | 1.276650  | 0.858232  | -0.397784 |
| C  | 2.043363  | 1.830517  | -0.793888 |
| N  | 1.565067  | 3.128898  | -1.072823 |
| C  | 2.037506  | 3.866079  | -2.266696 |
| C  | 3.290800  | 4.727595  | -2.057949 |
| C  | 4.542505  | 3.884070  | -1.811292 |
| C  | 4.349147  | 2.845104  | -0.695977 |
| N  | 3.433291  | 1.720276  | -0.999823 |
| C  | -0.878557 | 3.557453  | -1.201079 |
| C  | -0.975689 | 2.914042  | -2.564871 |
| C  | -2.023599 | 4.151458  | -0.632575 |
| C  | -2.004647 | 4.760410  | 0.636480  |
| C  | -3.259603 | 5.363231  | 1.227733  |
| C  | -0.789588 | 4.755702  | 1.349182  |
| C  | 0.387324  | 4.190114  | 0.819441  |
| C  | 1.672358  | 4.254705  | 1.613534  |
| C  | 4.059949  | 0.425495  | -1.129191 |
| C  | 4.629251  | -0.198425 | 0.011864  |
| C  | 4.527457  | 0.435557  | 1.380428  |
| C  | 5.325297  | -1.412932 | -0.155660 |
| C  | 5.472347  | -2.022686 | -1.416032 |
| C  | 6.193074  | -3.343273 | -1.568079 |
| C  | 4.900513  | -1.376046 | -2.530026 |
| C  | 4.201225  | -0.158009 | -2.416122 |
| C  | 3.662118  | 0.521989  | -3.654477 |
| H  | 2.217543  | 3.143536  | -3.093275 |
| H  | 1.202023  | 4.517009  | -2.588861 |
| H  | 3.431704  | 5.368663  | -2.955825 |
| H  | 3.115680  | 5.419453  | -1.204447 |
| H  | 4.845239  | 3.361968  | -2.745563 |
| H  | 5.396428  | 4.538476  | -1.529266 |
| H  | 5.331639  | 2.390189  | -0.462244 |
| H  | 4.001385  | 3.358047  | 0.226598  |
| H  | 4.706911  | -0.309017 | 2.180085  |
| H  | 3.527983  | 0.887973  | 1.539882  |
| H  | 5.278481  | 1.244508  | 1.517412  |
| H  | 5.766754  | -1.896562 | 0.732348  |
| H  | 6.752442  | -3.397017 | -2.524618 |
| H  | 6.908222  | -3.518705 | -0.739246 |
| H  | 5.470594  | -4.189175 | -1.564958 |
| H  | 5.014064  | -1.827260 | -3.530463 |
| H  | 4.194291  | 1.475751  | -3.857535 |
| H  | 3.783761  | -0.125014 | -4.545263 |
| H  | 2.584632  | 0.766353  | -3.559970 |
| H  | -1.981252 | 2.472158  | -2.707437 |
| H  | -0.223232 | 2.111104  | -2.686297 |
| H  | -0.813794 | 3.653201  | -3.381330 |
| H  | -2.964676 | 4.120390  | -1.206333 |
| H  | -3.030192 | 6.031936  | 2.081556  |
| H  | -3.944737 | 4.570749  | 1.602400  |
| H  | -3.826376 | 5.947860  | 0.473768  |
| H  | -0.748390 | 5.221516  | 2.348276  |
| H  | 2.449010  | 4.847076  | 1.085065  |
| H  | 1.503198  | 4.727906  | 2.600563  |
| H  | 2.101964  | 3.246255  | 1.791074  |
| Si | 0.544671  | -3.220272 | -1.921264 |

|    |           |           |           |
|----|-----------|-----------|-----------|
| Si | -1.634947 | -3.697471 | 0.246230  |
| C  | 0.934865  | -1.685101 | -2.966848 |
| C  | -0.336965 | -4.466040 | -3.057180 |
| C  | 2.177549  | -4.033477 | -1.380982 |
| C  | -2.530835 | -2.589535 | 1.523054  |
| C  | -2.997634 | -4.336074 | -0.905880 |
| C  | -0.879459 | -5.192212 | 1.153196  |
| H  | 0.309545  | -4.653559 | -3.942168 |
| H  | -0.510949 | -5.444782 | -2.562969 |
| H  | -1.311311 | -4.083004 | -3.422405 |
| H  | 0.005509  | -1.248166 | -3.389549 |
| H  | 1.609167  | -1.940954 | -3.810782 |
| H  | 1.443235  | -0.902139 | -2.363862 |
| H  | 1.991347  | -4.907472 | -0.721367 |
| H  | 2.746394  | -4.391900 | -2.266186 |
| H  | 2.823480  | -3.319293 | -0.829641 |
| H  | -3.437029 | -3.489610 | -1.472947 |
| H  | -2.643427 | -5.106623 | -1.618241 |
| H  | -3.801581 | -4.795351 | -0.289482 |
| H  | -3.049708 | -1.744666 | 1.014640  |
| H  | -3.321266 | -3.189252 | 2.021891  |
| H  | -1.886653 | -2.182734 | 2.332599  |
| H  | -1.666572 | -5.762505 | 1.692556  |
| H  | -0.399126 | -5.890652 | 0.435077  |
| H  | -0.109195 | -4.892500 | 1.893780  |
| Si | 1.173411  | -1.464170 | 3.470865  |
| Si | -1.055971 | 0.684602  | 3.688260  |
| C  | 0.432081  | -2.863438 | 4.528806  |
| C  | 2.420045  | -0.540138 | 4.572960  |
| C  | 2.122176  | -2.305834 | 2.046119  |
| C  | -0.070014 | 2.108263  | 4.474728  |
| C  | -2.348031 | 1.453523  | 2.523845  |
| C  | -2.000256 | -0.192323 | 5.090514  |
| H  | -0.334697 | -3.438777 | 3.969668  |
| H  | 1.229434  | -3.575147 | 4.835464  |
| H  | -0.044989 | -2.479541 | 5.453803  |
| H  | -0.759017 | 2.832951  | 4.960181  |
| H  | 0.514149  | 2.655191  | 3.706921  |
| H  | 0.638419  | 1.747826  | 5.248277  |
| H  | 2.840465  | 0.353677  | 4.068874  |
| H  | 1.950208  | -0.205643 | 5.521541  |
| H  | 3.262400  | -1.213348 | 4.843027  |
| H  | 2.947532  | -2.920443 | 2.464512  |
| H  | 2.593483  | -1.594673 | 1.332767  |
| H  | 1.478104  | -2.995935 | 1.460701  |
| H  | -2.982833 | 2.156537  | 3.104652  |
| H  | -1.905125 | 2.042880  | 1.691439  |
| H  | -3.024090 | 0.695088  | 2.076495  |
| H  | -2.578895 | -1.063408 | 4.718675  |
| H  | -2.716765 | 0.514443  | 5.562959  |
| H  | -1.318393 | -0.552725 | 5.889184  |
| B  | -3.166820 | -0.166549 | -2.214734 |
| O  | -3.832437 | 1.032498  | -2.444438 |
| C  | -5.171446 | 0.916869  | -1.881648 |
| C  | -5.390887 | -0.659801 | -1.845466 |
| O  | -4.029969 | -1.174637 | -1.793047 |
| C  | -5.146508 | 1.555345  | -0.483918 |
| C  | -6.140796 | 1.679237  | -2.791339 |
| C  | -6.162828 | -1.170958 | -0.624678 |
| C  | -6.023644 | -1.214888 | -3.134502 |
| H  | -4.405042 | 1.053394  | 0.168100  |
| H  | -4.839682 | 2.616282  | -0.576904 |
| H  | -6.142522 | 1.524942  | 0.002322  |
| H  | -5.655123 | -0.907941 | 0.322406  |

|   |           |           |           |
|---|-----------|-----------|-----------|
| H | -6.246306 | -2.275795 | -0.670714 |
| H | -7.190594 | -0.752442 | -0.602085 |
| H | -7.188733 | 1.561477  | -2.445021 |
| H | -5.896894 | 2.760992  | -2.771190 |
| H | -6.074799 | 1.337875  | -3.841694 |
| H | -5.963969 | -2.321859 | -3.116236 |
| H | -5.480207 | -0.862120 | -4.033877 |
| H | -7.090592 | -0.927548 | -3.230805 |
| H | -2.084423 | -0.391402 | -2.706430 |
| C | 0.340633  | 3.598240  | -0.471885 |
| H | -2.108995 | 0.222778  | -0.405310 |

E(solv)= -3625.88895487 A.U

Thermal correction= 0.989444

Deact-1

|    |           |           |           |
|----|-----------|-----------|-----------|
| Th | -0.232141 | -0.823466 | 0.128670  |
| N  | 0.065277  | 1.413182  | -0.056359 |
| C  | 0.165761  | 2.699608  | -0.178876 |
| N  | -0.885556 | 3.549185  | -0.620029 |
| C  | -0.623891 | 4.632218  | -1.597612 |
| C  | -0.237099 | 5.993936  | -1.004986 |
| C  | 1.126864  | 5.960274  | -0.318329 |
| C  | 1.242603  | 4.811316  | 0.694701  |
| N  | 1.332210  | 3.447736  | 0.121142  |
| C  | 2.660200  | 2.888452  | 0.097386  |
| C  | 3.377896  | 2.710203  | 1.312527  |
| C  | 4.750639  | 2.387814  | 1.255460  |
| C  | 5.432088  | 2.218105  | 0.038114  |
| C  | 4.681846  | 2.336429  | -1.150339 |
| C  | 3.311929  | 2.663143  | -1.148623 |
| C  | 2.574905  | 2.795823  | -2.460411 |
| C  | 2.719572  | 2.869370  | 2.664814  |
| C  | 6.914726  | 1.921636  | -0.005251 |
| C  | -2.274153 | 3.187352  | -0.469532 |
| C  | -2.986411 | 2.638649  | -1.571532 |
| C  | -4.381889 | 2.475038  | -1.467127 |
| C  | -5.088239 | 2.788910  | -0.290211 |
| C  | -4.352858 | 3.293656  | 0.798730  |
| C  | -2.962800 | 3.520626  | 0.729155  |
| C  | -2.261962 | 4.173327  | 1.898613  |
| C  | -2.272599 | 2.258764  | -2.849065 |
| C  | -6.580640 | 2.562837  | -0.194551 |
| H  | 0.164096  | 4.299497  | -2.307452 |
| H  | -1.551476 | 4.757008  | -2.188909 |
| H  | -0.241307 | 6.746825  | -1.823788 |
| H  | -1.023374 | 6.311419  | -0.284621 |
| H  | 1.312238  | 6.917733  | 0.216360  |
| H  | 1.941068  | 5.860792  | -1.070346 |
| H  | 2.160759  | 4.966149  | 1.291250  |
| H  | 0.388257  | 4.848150  | 1.402010  |
| H  | 1.631975  | 2.672864  | 2.616404  |
| H  | 2.852904  | 3.893655  | 3.079224  |
| H  | 3.164846  | 2.169307  | 3.399753  |
| H  | 5.301239  | 2.259733  | 2.203150  |
| H  | 7.490002  | 2.802064  | -0.366977 |
| H  | 7.308852  | 1.657039  | 0.996288  |
| H  | 7.145921  | 1.084200  | -0.696621 |
| H  | 5.184926  | 2.191633  | -2.121731 |
| H  | 2.237970  | 3.839668  | -2.635746 |
| H  | 3.224184  | 2.506851  | -3.309843 |
| H  | 1.669744  | 2.153914  | -2.486768 |
| H  | -1.365421 | 3.608532  | 2.220290  |
| H  | -1.928866 | 5.202000  | 1.642898  |

|    |           |           |           |
|----|-----------|-----------|-----------|
| H  | -2.940991 | 4.250524  | 2.770512  |
| H  | -4.882807 | 3.554632  | 1.730648  |
| H  | -7.032194 | 3.146197  | 0.632953  |
| H  | -7.097758 | 2.842705  | -1.135598 |
| H  | -6.812165 | 1.491065  | -0.007152 |
| H  | -4.933950 | 2.077139  | -2.334318 |
| H  | -2.169601 | 3.119702  | -3.545788 |
| H  | -1.254941 | 1.879464  | -2.632118 |
| H  | -2.827817 | 1.469683  | -3.392743 |
| N  | -0.526713 | -1.615486 | 2.354716  |
| Si | -0.338656 | -0.605375 | 3.799595  |
| Si | -0.845167 | -3.350245 | 2.572770  |
| C  | -1.453024 | -1.083818 | 5.271972  |
| C  | -0.810949 | 1.181774  | 3.362635  |
| C  | 1.455473  | -0.615615 | 4.439558  |
| C  | 0.345487  | -4.193294 | 3.798963  |
| C  | -0.638853 | -4.223103 | 0.893590  |
| C  | -2.615246 | -3.717337 | 3.176430  |
| H  | 1.777723  | -1.640167 | 4.719896  |
| H  | 1.562642  | 0.030463  | 5.337823  |
| H  | 2.161931  | -0.242415 | 3.668536  |
| H  | -0.273094 | 1.546979  | 2.461933  |
| H  | -0.574885 | 1.865964  | 4.205328  |
| H  | -1.898706 | 1.260953  | 3.154880  |
| H  | -1.292145 | -0.350514 | 6.092144  |
| H  | -2.529415 | -1.054074 | 5.002452  |
| H  | -1.229717 | -2.090162 | 5.682876  |
| H  | -2.798466 | -3.327663 | 4.197656  |
| H  | -3.380653 | -3.276051 | 2.505449  |
| H  | -2.786241 | -4.815730 | 3.201896  |
| H  | 0.230379  | -3.809631 | 4.834310  |
| H  | 1.406874  | -4.058550 | 3.504370  |
| H  | 0.142020  | -5.285839 | 3.827901  |
| H  | -1.203757 | -3.745218 | 0.063386  |
| H  | 0.420243  | -4.289125 | 0.577832  |
| H  | -1.025560 | -5.261463 | 0.974990  |
| N  | -1.710217 | -1.695465 | -1.516359 |
| Si | -3.397107 | -1.709905 | -0.996212 |
| Si | -1.193157 | -2.336805 | -3.090621 |
| C  | -4.648903 | -0.984872 | -2.235833 |
| C  | -3.461818 | -0.627867 | 0.580909  |
| C  | -4.074449 | -3.442081 | -0.580405 |
| C  | -0.083531 | -1.045301 | -3.945205 |
| C  | -2.605226 | -2.703011 | -4.318842 |
| C  | -0.228930 | -3.954482 | -2.877700 |
| H  | -2.809052 | -0.981287 | 1.413241  |
| H  | -3.220079 | 0.435918  | 0.360692  |
| H  | -4.491607 | -0.634366 | 0.996408  |
| H  | -4.247747 | -0.099192 | -2.765847 |
| H  | -5.570400 | -0.672394 | -1.698807 |
| H  | -4.944450 | -1.735292 | -2.996643 |
| H  | -5.131380 | -3.368511 | -0.243009 |
| H  | -3.499762 | -3.959961 | 0.212758  |
| H  | -4.060523 | -4.091661 | -1.481599 |
| H  | -0.668747 | -0.142493 | -4.219209 |
| H  | 0.370845  | -1.452632 | -4.873625 |
| H  | 0.751145  | -0.717904 | -3.290189 |
| H  | -3.170217 | -1.794371 | -4.610402 |
| H  | -3.328708 | -3.453099 | -3.935871 |
| H  | -2.154160 | -3.127191 | -5.242506 |
| H  | -0.869381 | -4.738189 | -2.420343 |
| H  | 0.127953  | -4.338133 | -3.857346 |
| H  | 0.659004  | -3.811248 | -2.228718 |
| B  | 3.561424  | -3.912803 | -3.367233 |



|   |          |           |           |
|---|----------|-----------|-----------|
| O | 3.192468 | -3.411381 | -2.169823 |
| C | 3.812145 | -2.259676 | -1.501309 |
| C | 5.306523 | -2.567173 | -1.294965 |
| C | 3.642194 | -1.024890 | -2.389637 |
| C | 3.032605 | -2.108531 | -0.128348 |
| C | 2.999489 | -3.455179 | 0.620701  |
| C | 3.690100 | -1.044378 | 0.771314  |
| O | 1.690626 | -1.686575 | -0.379626 |
| H | 4.468706 | -3.428986 | -4.029578 |
| H | 4.162403 | -1.173455 | -3.357138 |
| H | 2.570831 | -0.836591 | -2.583861 |
| H | 4.065721 | -0.127078 | -1.900538 |
| H | 5.786953 | -2.749368 | -2.276965 |
| H | 5.459538 | -3.466465 | -0.666111 |
| H | 5.828050 | -1.713271 | -0.820703 |
| H | 2.522277 | -4.238054 | 0.002246  |
| H | 4.017559 | -3.799008 | 0.894177  |
| H | 2.424012 | -3.330097 | 1.558952  |
| H | 3.721721 | -0.054390 | 0.278765  |
| H | 4.716315 | -1.322852 | 1.082869  |
| H | 3.080760 | -0.943713 | 1.692682  |
| H | 2.942532 | -4.886328 | -3.757732 |

E(solv)= -3625.89996424 A.U

Thermal correction= 0.989202

Deact-TS-2

|    |           |           |           |
|----|-----------|-----------|-----------|
| Th | -0.147953 | -0.675219 | -0.728534 |
| N  | -0.985354 | -2.391609 | 1.035493  |
| N  | 0.901120  | -1.402520 | -2.752464 |
| O  | -1.929602 | 0.112584  | -1.642464 |
| Si | 0.169788  | -2.815765 | -3.534229 |
| Si | 0.540240  | -3.215499 | 1.478887  |
| Si | -2.493374 | -3.392726 | 1.101141  |
| Si | 2.377317  | -0.746397 | -3.492047 |
| C  | -2.956468 | -3.924406 | 2.871232  |
| H  | -3.261042 | -3.066103 | 3.495694  |
| H  | -3.813780 | -4.630043 | 2.819635  |
| H  | -2.124259 | -4.456950 | 3.378706  |
| C  | -3.946534 | -2.465494 | 0.327242  |
| H  | -4.149672 | -1.525645 | 0.873850  |
| H  | -3.776392 | -2.210941 | -0.737663 |
| H  | -4.855103 | -3.102816 | 0.378470  |
| C  | -2.434788 | -5.108580 | 0.236441  |
| H  | -1.929854 | -5.161524 | -0.745061 |
| H  | -1.989874 | -5.883398 | 0.892132  |
| H  | -3.496615 | -5.396878 | 0.071292  |
| C  | 0.997597  | -3.176542 | 3.315347  |
| H  | 0.277578  | -3.764351 | 3.920993  |
| H  | 2.004819  | -3.623672 | 3.456877  |
| H  | 1.004513  | -2.139904 | 3.699305  |
| C  | 0.712083  | -5.037409 | 0.950168  |
| H  | 0.096823  | -5.723579 | 1.565943  |
| H  | 0.459971  | -5.215122 | -0.114265 |
| H  | 1.776016  | -5.325130 | 1.099280  |
| C  | 1.950585  | -2.345231 | 0.511959  |
| C  | 2.595127  | -1.082303 | -5.358528 |
| C  | 3.935515  | -1.475236 | -2.677434 |
| H  | 4.857041  | -1.051367 | -3.131562 |
| H  | 3.977542  | -1.293848 | -1.584544 |
| H  | 3.963446  | -2.575080 | -2.832266 |
| C  | 1.305393  | -4.347122 | -3.484518 |
| H  | 1.606116  | -4.598780 | -2.445480 |

|   |           |           |           |
|---|-----------|-----------|-----------|
| H | 0.787271  | -5.233387 | -3.911113 |
| H | 2.234022  | -4.193659 | -4.073740 |
| C | -0.387078 | -2.588240 | -5.343777 |
| H | 0.443663  | -2.704385 | -6.067257 |
| H | -1.148949 | -3.361644 | -5.583541 |
| H | -0.852696 | -1.596267 | -5.517037 |
| C | -1.399609 | -3.230144 | -2.553554 |
| H | -2.176419 | -2.447450 | -2.658076 |
| H | -1.838080 | -4.180049 | -2.924567 |
| H | -1.212418 | -3.384992 | -1.470158 |
| O | -0.686722 | -0.262735 | 3.317341  |
| C | -1.516301 | -0.199315 | 4.518564  |
| C | -2.978265 | -0.014757 | 3.913296  |
| O | -2.854249 | -0.606240 | 2.589777  |
| C | -1.028605 | 0.982562  | 5.367173  |
| H | -0.001394 | 0.780748  | 5.732979  |
| H | -1.004504 | 1.925302  | 4.790363  |
| C | -1.347168 | -1.495597 | 5.324163  |
| H | -1.931318 | -1.459795 | 6.266317  |
| H | -1.664391 | -2.383276 | 4.747065  |
| H | -0.280690 | -1.626338 | 5.594045  |
| C | -4.095144 | -0.715819 | 4.693370  |
| H | -5.058409 | -0.585984 | 4.159860  |
| H | -3.918122 | -1.800163 | 4.813745  |
| H | -4.202561 | -0.268337 | 5.703280  |
| B | -1.506976 | -0.508552 | 2.206628  |
| H | -1.240196 | 0.156592  | 1.199631  |
| H | -4.311772 | 1.502213  | 3.125325  |
| C | -3.367819 | 1.461108  | 3.704590  |
| H | -2.595047 | 2.002845  | 3.125891  |
| H | -3.527931 | 1.989707  | 4.666199  |
| H | -1.679688 | 1.127295  | 6.254506  |
| H | 2.910876  | -2.777478 | 0.859268  |
| H | 1.923658  | -2.538171 | -0.586628 |
| H | 2.073178  | -1.248296 | 0.687426  |
| N | 1.123715  | 1.045805  | 0.036843  |
| C | 1.848300  | 2.058205  | 0.408139  |
| N | 1.598478  | 3.409061  | 0.008998  |
| N | 3.010255  | 1.973853  | 1.222858  |
| C | 2.725677  | 4.287105  | -0.379805 |
| C | 3.362182  | 5.103310  | 0.752879  |
| H | 3.500612  | 3.668048  | -0.877679 |
| H | 2.349084  | 4.988270  | -1.143775 |
| C | 4.176547  | 4.222220  | 1.695611  |
| H | 4.006480  | 5.890610  | 0.303365  |
| H | 2.558380  | 5.635245  | 1.309645  |
| C | 3.371833  | 3.022456  | 2.209494  |
| H | 5.096617  | 3.858944  | 1.186321  |
| H | 4.520244  | 4.805898  | 2.577919  |
| H | 3.972111  | 2.514348  | 2.987366  |
| H | 2.451585  | 3.389919  | 2.709551  |
| C | 0.280429  | 3.965154  | -0.146898 |
| C | 3.761823  | 0.748399  | 1.390108  |
| C | -0.590539 | 4.059422  | 0.982679  |
| C | -1.804576 | 4.759652  | 0.863302  |
| C | -2.200043 | 5.396092  | -0.330117 |
| C | -1.345569 | 5.266071  | -1.435680 |
| C | -0.128914 | 4.549415  | -1.382335 |
| C | -0.225550 | 3.476087  | 2.324775  |
| H | -2.455776 | 4.829427  | 1.751275  |
| C | -3.500479 | 6.163577  | -0.409867 |
| H | -1.638223 | 5.723323  | -2.396579 |
| C | 0.668675  | 4.435821  | -2.664451 |
| H | -4.375954 | 5.491690  | -0.275801 |

|   |           |           |           |
|---|-----------|-----------|-----------|
| H | -3.566283 | 6.935845  | 0.386116  |
| H | -3.615838 | 6.674155  | -1.386832 |
| H | 1.327842  | 3.548433  | -2.671425 |
| H | -0.016785 | 4.357233  | -3.532340 |
| H | 1.304306  | 5.331099  | -2.848303 |
| H | -1.033769 | 3.664240  | 3.057902  |
| H | -0.046456 | 2.381676  | 2.281904  |
| H | 0.695014  | 3.945225  | 2.730208  |
| H | 3.527118  | -0.567674 | -5.680794 |
| H | 2.715056  | -2.157124 | -5.606100 |
| H | 1.762611  | -0.676140 | -5.968607 |
| C | 4.786255  | 0.422605  | 0.459058  |
| C | 5.601269  | -0.699530 | 0.707902  |
| C | 5.460794  | -1.489321 | 1.866116  |
| C | 4.458182  | -1.127646 | 2.783929  |
| C | 3.599928  | -0.027795 | 2.570919  |
| C | 5.060452  | 1.286271  | -0.749458 |
| H | 6.393079  | -0.945128 | -0.019903 |
| C | 6.360188  | -2.682115 | 2.104791  |
| H | 4.331475  | -1.721826 | 3.704741  |
| C | 2.552435  | 0.309098  | 3.604815  |
| H | 7.429087  | -2.421808 | 1.953978  |
| H | 6.247787  | -3.080730 | 3.132782  |
| H | 6.130761  | -3.509350 | 1.397936  |
| H | 4.157392  | 1.430069  | -1.373615 |
| H | 5.411306  | 2.295811  | -0.447487 |
| H | 5.845314  | 0.835264  | -1.386688 |
| H | 2.467782  | -0.504793 | 4.350790  |
| H | 2.800415  | 1.235907  | 4.165416  |
| H | 1.551013  | 0.454301  | 3.152718  |
| C | 2.356991  | 1.147805  | -3.354263 |
| H | 3.317984  | 1.596530  | -3.684128 |
| H | 1.556318  | 1.550559  | -4.010034 |
| H | 2.142653  | 1.482062  | -2.318955 |
| C | -2.781186 | 0.809377  | -2.554609 |
| C | -4.086411 | 1.308166  | -1.799656 |
| C | -1.968101 | 1.994102  | -3.111342 |
| C | -3.155719 | -0.134622 | -3.712389 |
| H | -3.809807 | 0.370598  | -4.452047 |
| H | -2.233316 | -0.452628 | -4.236007 |
| H | -3.690414 | -1.026337 | -3.338129 |
| H | -2.497573 | 2.530501  | -3.923620 |
| H | -1.709259 | 2.714201  | -2.311787 |
| H | -1.022271 | 1.594087  | -3.530140 |
| C | -4.853228 | 2.368070  | -2.611808 |
| O | -4.948953 | 0.126823  | -1.685002 |
| C | -3.760855 | 1.833562  | -0.399015 |
| H | -5.823065 | 2.576009  | -2.116172 |
| H | -4.290271 | 3.320128  | -2.661604 |
| H | -5.063172 | 2.026461  | -3.645695 |
| H | -4.674484 | 2.239516  | 0.079484  |
| H | -3.356258 | 1.025122  | 0.236912  |
| H | -3.010064 | 2.645684  | -0.447408 |
| B | -6.141166 | 0.076694  | -1.056458 |
| H | -6.628527 | 1.048140  | -0.494671 |
| H | -6.723516 | -0.993067 | -1.091123 |

E(solv)= -4037.74205188 A.U

Thermal correction= 1.171643

Deact-2

|    |           |           |           |
|----|-----------|-----------|-----------|
| Th | -0.098956 | 0.927921  | -2.021127 |
| N  | 0.818110  | -0.435108 | -3.705641 |

|    |           |           |           |
|----|-----------|-----------|-----------|
| O  | -1.180545 | 2.490610  | -3.097127 |
| Si | 0.252737  | -2.083312 | -3.996947 |
| Si | 1.999683  | 0.390200  | -4.719108 |
| C  | 1.543660  | 0.416534  | -6.565272 |
| C  | 3.762636  | -0.306234 | -4.552942 |
| H  | 4.484431  | 0.311244  | -5.130655 |
| H  | 4.086660  | -0.309321 | -3.491394 |
| H  | 3.833233  | -1.347206 | -4.929317 |
| C  | 1.650336  | -3.284278 | -4.474811 |
| H  | 2.458775  | -3.286334 | -3.714236 |
| H  | 1.251715  | -4.318815 | -4.554176 |
| H  | 2.104875  | -3.030072 | -5.455822 |
| C  | -1.065883 | -2.147756 | -5.368075 |
| H  | -0.663889 | -1.786165 | -6.337513 |
| H  | -1.439318 | -3.183506 | -5.520347 |
| H  | -1.937623 | -1.509327 | -5.111339 |
| C  | -0.535646 | -2.731333 | -2.389825 |
| H  | -1.428534 | -2.158952 | -2.055640 |
| H  | -0.877195 | -3.778726 | -2.535980 |
| H  | 0.194734  | -2.736227 | -1.551389 |
| N  | 1.280541  | 1.799537  | -0.517757 |
| C  | 2.066460  | 2.184379  | 0.437288  |
| N  | 2.394460  | 3.531807  | 0.680432  |
| N  | 2.670168  | 1.273969  | 1.328797  |
| C  | 3.746730  | 3.938576  | 1.116536  |
| C  | 4.021672  | 3.843279  | 2.624137  |
| H  | 4.506966  | 3.340683  | 0.564716  |
| H  | 3.873683  | 4.991085  | 0.799835  |
| C  | 4.096649  | 2.399465  | 3.123110  |
| H  | 4.978920  | 4.368500  | 2.836142  |
| H  | 3.229741  | 4.400354  | 3.172742  |
| C  | 2.849094  | 1.580407  | 2.764556  |
| H  | 4.996265  | 1.894993  | 2.705204  |
| H  | 4.213932  | 2.385105  | 4.228997  |
| H  | 2.901039  | 0.604837  | 3.285120  |
| H  | 1.944518  | 2.103235  | 3.148992  |
| C  | 1.524197  | 4.561549  | 0.167018  |
| C  | 2.686008  | -0.120300 | 0.951237  |
| C  | 0.309176  | 4.842769  | 0.849369  |
| C  | -0.501186 | 5.896466  | 0.383803  |
| C  | -0.147515 | 6.680503  | -0.732349 |
| C  | 1.047316  | 6.360715  | -1.403619 |
| C  | 1.889596  | 5.311774  | -0.982812 |
| C  | -0.123510 | 4.031694  | 2.047475  |
| H  | -1.439577 | 6.115781  | 0.920901  |
| C  | -1.007925 | 7.841809  | -1.179472 |
| H  | 1.332207  | 6.936946  | -2.300714 |
| C  | 3.147692  | 5.011136  | -1.767052 |
| H  | -2.064940 | 7.712748  | -0.870519 |
| H  | -0.652373 | 8.798245  | -0.735498 |
| H  | -0.984696 | 7.968320  | -2.281257 |
| H  | 3.420672  | 3.939985  | -1.703449 |
| H  | 3.012480  | 5.267789  | -2.836417 |
| H  | 4.020397  | 5.596634  | -1.401188 |
| H  | -1.039196 | 4.453883  | 2.505784  |
| H  | -0.343298 | 2.979112  | 1.765290  |
| H  | 0.666990  | 3.997981  | 2.825731  |
| H  | 2.270105  | 1.030377  | -7.140634 |
| H  | 1.554026  | -0.604420 | -7.002505 |
| H  | 0.531809  | 0.843928  | -6.724283 |
| C  | 3.724932  | -0.591269 | 0.103810  |
| C  | 3.768843  | -1.961301 | -0.217158 |
| C  | 2.819206  | -2.878547 | 0.278883  |
| C  | 1.789527  | -2.378624 | 1.097741  |

|   |           |           |           |
|---|-----------|-----------|-----------|
| C | 1.696272  | -1.012991 | 1.442610  |
| C | 4.767040  | 0.353215  | -0.448388 |
| H | 4.579905  | -2.324575 | -0.871014 |
| C | 2.922750  | -4.353262 | -0.042277 |
| H | 1.018930  | -3.070683 | 1.477647  |
| C | 0.557098  | -0.537384 | 2.316094  |
| H | 3.694276  | -4.846912 | 0.589210  |
| H | 1.964224  | -4.880086 | 0.137120  |
| H | 3.215127  | -4.522859 | -1.099058 |
| H | 4.306992  | 1.130844  | -1.094995 |
| H | 5.304760  | 0.889107  | 0.361732  |
| H | 5.516579  | -0.191920 | -1.054926 |
| H | -0.312100 | -1.218634 | 2.236012  |
| H | 0.845137  | -0.497098 | 3.389791  |
| H | 0.218021  | 0.476019  | 2.025201  |
| C | 2.061425  | 2.199585  | -4.101730 |
| H | 2.861493  | 2.743808  | -4.646941 |
| H | 1.114330  | 2.755863  | -4.272792 |
| H | 2.324292  | 2.287708  | -3.021244 |
| C | -2.593016 | 2.650686  | -3.229689 |
| C | -3.224778 | 2.119680  | -1.866933 |
| C | -2.905523 | 4.136720  | -3.483700 |
| C | -3.061391 | 1.813199  | -4.439060 |
| H | -4.125633 | 1.996383  | -4.691828 |
| H | -2.446000 | 2.086340  | -5.319590 |
| H | -2.931322 | 0.727455  | -4.252901 |
| H | -3.998335 | 4.335683  | -3.491376 |
| H | -2.428657 | 4.780083  | -2.719756 |
| H | -2.498322 | 4.431034  | -4.472465 |
| C | -4.699196 | 1.710433  | -1.967092 |
| O | -2.425097 | 0.925744  | -1.603848 |
| C | -3.023968 | 3.122987  | -0.720799 |
| H | -5.069778 | 1.386362  | -0.972963 |
| H | -5.324015 | 2.564216  | -2.302310 |
| H | -4.841152 | 0.868734  | -2.671257 |
| H | -3.246041 | 2.631546  | 0.246310  |
| H | -1.982160 | 3.503588  | -0.691201 |
| H | -3.703889 | 3.990613  | -0.831831 |
| B | -2.423868 | 0.019112  | -0.375489 |
| H | -1.195080 | -0.367933 | -0.347073 |
| H | -2.628828 | 0.617669  | 0.681324  |
| H | -3.107604 | -0.992377 | -0.534837 |

E(solv)= -2753.15644188 A.U.

Thermal correction= 0.794670

Deact-3

|   |           |           |           |
|---|-----------|-----------|-----------|
| C | 4.070785  | -0.928722 | 1.076401  |
| C | 3.784445  | -0.329232 | -0.177848 |
| C | 4.008753  | -1.050595 | -1.384202 |
| C | 4.553743  | -2.345152 | -1.309983 |
| C | 4.892129  | -2.947913 | -0.080854 |
| C | 4.633223  | -2.223585 | 1.096075  |
| N | 3.338314  | 1.038884  | -0.252289 |
| C | 4.257016  | 2.068244  | 0.279335  |
| C | 4.892092  | 2.996944  | -0.766789 |
| C | 3.881942  | 3.952807  | -1.400911 |
| C | 2.654578  | 3.229058  | -1.973700 |
| N | 1.746601  | 2.616496  | -0.980362 |
| C | 0.429003  | 3.195983  | -0.870294 |
| C | 0.065752  | 3.867095  | 0.325645  |
| C | -1.182587 | 4.517505  | 0.386130  |
| C | -2.077283 | 4.525312  | -0.700027 |

|    |           |           |           |
|----|-----------|-----------|-----------|
| C  | -1.698688 | 3.833094  | -1.867205 |
| C  | -0.467575 | 3.156213  | -1.972462 |
| C  | 0.993817  | 3.896379  | 1.517018  |
| C  | -3.418049 | 5.220180  | -0.613142 |
| C  | -0.125976 | 2.402801  | -3.238113 |
| C  | 3.687591  | -0.441825 | -2.728691 |
| C  | 5.493709  | -4.335502 | -0.041411 |
| C  | 3.778701  | -0.226464 | 2.383849  |
| C  | 1.970574  | 1.316738  | -0.474592 |
| N  | 1.018922  | 0.472691  | -0.237413 |
| Th | -0.821928 | -0.691282 | 0.286088  |
| O  | -1.231312 | -1.397596 | 2.617792  |
| C  | -1.615817 | -0.355962 | 3.562945  |
| C  | -0.264895 | 0.197641  | 4.051820  |
| N  | -1.915376 | -1.269053 | -1.706130 |
| Si | -3.583912 | -0.887861 | -2.172852 |
| C  | -4.121498 | 0.738102  | -1.353572 |
| O  | -1.915863 | 0.771556  | 1.441235  |
| C  | -2.453512 | 0.752537  | 2.761004  |
| C  | -3.962667 | 0.430198  | 2.698159  |
| Si | -0.936337 | -2.409850 | -2.628126 |
| C  | 0.567702  | -2.868782 | -1.530308 |
| C  | -0.248992 | -1.693481 | -4.251353 |
| C  | -1.819142 | -4.044576 | -3.036665 |
| C  | -4.799931 | -2.246725 | -1.629613 |
| C  | -3.777283 | -0.660011 | -4.057764 |
| C  | -2.290878 | 2.158978  | 3.373920  |
| C  | -2.382180 | -0.971372 | 4.739735  |
| H  | -4.820723 | -0.360022 | -4.296790 |
| H  | -3.102072 | 0.132409  | -4.443881 |
| H  | -3.566209 | -1.591791 | -4.624135 |
| H  | 0.314161  | -0.755325 | -4.066514 |
| H  | 0.437937  | -2.415420 | -4.743838 |
| H  | -1.062246 | -1.459137 | -4.968591 |
| H  | -2.675340 | -3.890133 | -3.726279 |
| H  | -1.116325 | -4.748096 | -3.533469 |
| H  | -2.204575 | -4.535330 | -2.118897 |
| H  | 0.297747  | -3.471717 | -0.634576 |
| H  | 1.242108  | -3.517289 | -2.128991 |
| H  | 1.212090  | -2.014025 | -1.214267 |
| H  | 2.986847  | 2.453858  | -2.699849 |
| H  | 2.048536  | 3.961376  | -2.541399 |
| H  | 4.363909  | 4.525073  | -2.224091 |
| H  | 3.541974  | 4.705452  | -0.654966 |
| H  | 5.380333  | 2.375226  | -1.550116 |
| H  | 5.705246  | 3.573773  | -0.273415 |
| H  | 5.064969  | 1.526767  | 0.807597  |
| H  | 3.724965  | 2.678300  | 1.042856  |
| H  | -1.459005 | 5.044724  | 1.314691  |
| H  | -2.388512 | 3.810159  | -2.728292 |
| H  | -3.615107 | 5.842685  | -1.511189 |
| H  | -4.245889 | 4.480910  | -0.545608 |
| H  | -3.483166 | 5.875802  | 0.278250  |
| H  | 0.417959  | 1.465875  | -3.004740 |
| H  | -1.043923 | 2.135819  | -3.797333 |
| H  | 0.514599  | 2.997509  | -3.925852 |
| H  | 0.559081  | 4.487888  | 2.346625  |
| H  | 1.193667  | 2.871943  | 1.897824  |
| H  | 1.978495  | 4.339892  | 1.259873  |
| H  | -5.842752 | -1.977818 | -1.905662 |
| H  | -4.565636 | -3.222745 | -2.102557 |
| H  | -4.762415 | -2.390666 | -0.529503 |
| H  | 4.737828  | -2.894604 | -2.249134 |
| H  | 4.863074  | -2.681133 | 2.073277  |

|   |           |           |           |
|---|-----------|-----------|-----------|
| H | 4.748915  | -5.107970 | -0.332033 |
| H | 6.345306  | -4.429874 | -0.748063 |
| H | 5.864265  | -4.592533 | 0.971197  |
| H | 2.606793  | -0.200929 | -2.817942 |
| H | 4.240294  | 0.507619  | -2.888781 |
| H | 3.949904  | -1.133732 | -3.552985 |
| H | 3.517742  | -0.963095 | 3.169636  |
| H | 4.652494  | 0.354144  | 2.754681  |
| H | 2.931786  | 0.479876  | 2.280043  |
| H | -5.180455 | 0.959169  | -1.607292 |
| H | -4.039125 | 0.691450  | -0.248415 |
| H | -3.500639 | 1.594049  | -1.691666 |
| H | -4.445754 | 0.525736  | 3.692049  |
| H | -4.449991 | 1.157239  | 2.017174  |
| H | -4.153406 | -0.588468 | 2.311532  |
| H | -2.585609 | 2.179673  | 4.444608  |
| H | -1.249531 | 2.520699  | 3.282157  |
| H | -2.941165 | 2.870056  | 2.825450  |
| H | -1.730025 | -1.686055 | 5.281755  |
| H | -2.695773 | -0.182944 | 5.454931  |
| H | -3.283115 | -1.518436 | 4.404721  |
| H | 0.360390  | -0.644915 | 4.407902  |
| H | 0.280595  | 0.701434  | 3.226075  |
| H | -0.386616 | 0.923260  | 4.879667  |
| O | 1.054587  | -4.432435 | 1.726097  |
| B | 1.436960  | -3.211605 | 2.213706  |
| O | 1.841444  | -3.221976 | 3.525483  |
| C | 1.506567  | -4.541772 | 4.075528  |
| C | 1.314441  | -5.434202 | 2.763013  |
| H | 1.446130  | -2.210056 | 1.532613  |
| C | 0.214410  | -4.367187 | 4.887060  |
| C | 2.651210  | -4.984469 | 4.990367  |
| C | 0.120521  | -6.391921 | 2.807498  |
| C | 2.584452  | -6.187424 | 2.339089  |
| B | -2.137548 | -2.429198 | 1.962848  |
| H | -2.935417 | -1.852577 | 1.179010  |
| H | -1.341944 | -3.041104 | 1.201668  |
| H | -2.714179 | -3.206251 | 2.715631  |
| H | -0.091060 | -5.315497 | 5.373216  |
| H | 0.387320  | -3.612962 | 5.681237  |
| H | -0.619554 | -4.008501 | 4.252125  |
| H | 2.466214  | -6.002906 | 5.389806  |
| H | 3.625407  | -4.984341 | 4.466041  |
| H | 2.728143  | -4.290281 | 5.851520  |
| H | 0.052863  | -6.944286 | 1.848484  |
| H | 0.237053  | -7.136265 | 3.622262  |
| H | -0.832496 | -5.849729 | 2.952041  |
| H | 2.423829  | -6.625434 | 1.333569  |
| H | 3.458741  | -5.509561 | 2.277134  |
| H | 2.825485  | -7.010934 | 3.041056  |

E(solv)=- 3165.02313647 A.U

Thermal correction= 0.964027

Carbonate

|   |           |           |           |
|---|-----------|-----------|-----------|
| C | 0.992470  | 1.969940  | -0.800495 |
| C | -0.282273 | 1.125841  | -0.619913 |
| H | 1.028864  | 2.868767  | -0.154167 |
| H | 1.153918  | 2.276758  | -1.857738 |
| H | -0.755865 | 1.276640  | 0.375545  |
| H | -1.041768 | 1.288941  | -1.409530 |
| C | 1.563243  | -0.225534 | -0.470868 |
| O | 2.234116  | -1.210138 | -0.338532 |

O 0.210911 -0.218468 -0.708658  
O 2.032900 1.063272 -0.408404

E(solv)= -342.375704 A.U  
Thermal correction= 0.044062

E-Coord

Th 0.609874 -0.644144 0.129941  
Si -1.841004 -3.217450 -0.783056  
Si 0.721526 -4.184054 0.568656  
Si 4.208723 -0.423037 -0.724381  
Si 2.201715 -0.773009 -3.000000  
N -0.513378 1.264877 -0.161915  
N -0.418204 3.515443 0.615606  
N -2.201745 2.857749 -0.772273  
N -0.243229 -2.867641 -0.111545  
H 1.431631 -0.399106 2.072840  
N 2.520531 -0.561295 -1.264614  
C -1.014881 2.455285 -0.113384  
C -1.232735 4.457896 1.414988  
H -0.585441 4.810849 2.240850  
H -2.079731 3.909819 1.883658  
C -1.772343 5.679727 0.658850  
H -0.921598 6.208570 0.173958  
H -2.201010 6.389775 1.400332  
C -2.824177 5.305753 -0.385339  
H -3.758490 4.958840 0.110010  
H -3.102076 6.200716 -0.984827  
C -2.337405 4.212776 -1.348567  
H -3.062055 4.134273 -2.179899  
H -1.365927 4.516828 -1.795053  
C 0.980866 3.446933 0.962017  
C 1.384512 3.009446 2.250482  
C 2.748198 3.102297 2.602311  
H 3.057864 2.762165 3.605010  
C 3.718697 3.601889 1.716957  
C 3.293807 3.993736 0.429938  
H 4.036069 4.385278 -0.286291  
C 1.946697 3.921586 0.031228  
C 0.392679 2.474459 3.258520  
H 0.011281 3.275989 3.930609  
H 0.871938 1.702004 3.891400  
H -0.477028 2.009643 2.756465  
C 5.177131 3.686482 2.107632  
H 5.613359 4.673311 1.845080  
H 5.776689 2.916945 1.574513  
H 5.320081 3.525964 3.194896  
C 1.544663 4.361685 -1.357248  
H 0.810339 5.193833 -1.326131  
H 1.067887 3.532857 -1.922698  
H 2.425256 4.703959 -1.935709  
C -3.225531 1.906845 -1.120438  
C -3.483053 1.591470 -2.482433  
C -4.599364 0.787170 -2.797265  
H -4.797728 0.555299 -3.857779  
C -5.443055 0.252686 -1.809708  
C -5.132416 0.535546 -0.463485  
H -5.770331 0.120271 0.335556  
C -4.050254 1.356097 -0.096683  
C -2.594398 2.080898 -3.604865  
H -2.973800 3.020044 -4.066295  
H -2.542816 1.325363 -4.414203



|   |           |           |           |
|---|-----------|-----------|-----------|
| H | -1.563114 | 2.273939  | -3.253256 |
| C | -3.800819 | 1.658137  | 1.361091  |
| H | -2.796041 | 1.310300  | 1.678188  |
| H | -4.549051 | 1.153120  | 2.002732  |
| H | -3.856530 | 2.748568  | 1.564750  |
| C | -1.950468 | -4.858983 | -1.749094 |
| H | -1.207680 | -4.904672 | -2.572582 |
| H | -1.800371 | -5.749927 | -1.103886 |
| C | -2.312889 | -1.841047 | -1.998799 |
| H | -2.243159 | -0.823161 | -1.554922 |
| H | -3.365201 | -1.963819 | -2.329552 |
| H | -1.672261 | -1.868066 | -2.904833 |
| C | -3.199760 | -3.289359 | 0.557157  |
| H | -2.967341 | -4.042958 | 1.338905  |
| H | -4.178247 | -3.564813 | 0.107097  |
| H | -3.323547 | -2.303353 | 1.050627  |
| C | -0.222607 | -5.192382 | 1.889786  |
| H | -0.588398 | -4.531431 | 2.702772  |
| C | 2.261714  | -3.438714 | 1.400720  |
| H | 2.034915  | -2.648355 | 2.149863  |
| H | 2.949185  | -3.005924 | 0.642633  |
| H | 2.828151  | -4.239740 | 1.921564  |
| C | 1.383825  | -5.435079 | -0.705274 |
| H | 0.581299  | -6.031416 | -1.183988 |
| H | 2.076214  | -6.145405 | -0.202487 |
| H | 1.950672  | -4.922226 | -1.509121 |
| C | 1.956593  | -2.603750 | -3.459358 |
| H | 2.880069  | -3.187222 | -3.257845 |
| H | 1.711157  | -2.719332 | -4.537210 |
| H | 1.137373  | -3.061488 | -2.867075 |
| C | 3.522104  | -0.099637 | -4.199977 |
| H | 3.677006  | 0.992944  | -4.087876 |
| H | 3.162174  | -0.283865 | -5.235953 |
| H | 4.506228  | -0.602070 | -4.100032 |
| C | 0.617423  | 0.185044  | -3.453634 |
| H | -0.253710 | 0.003083  | -2.789572 |
| H | 0.295971  | -0.066800 | -4.487120 |
| H | 0.823002  | 1.275578  | -3.414139 |
| C | 5.243263  | -1.941117 | -1.247631 |
| H | 4.822881  | -2.883684 | -0.837763 |
| H | 6.285361  | -1.846481 | -0.871820 |
| H | 5.298590  | -2.052819 | -2.350996 |
| C | 4.349109  | -0.274967 | 1.166527  |
| H | 3.809019  | 0.612996  | 1.555519  |
| H | 5.426389  | -0.158370 | 1.417736  |
| H | 3.968285  | -1.157726 | 1.716382  |
| C | 5.092733  | 1.127616  | -1.396584 |
| H | 5.292106  | 1.086712  | -2.485277 |
| H | 6.071419  | 1.246311  | -0.882007 |
| H | 4.488320  | 2.034916  | -1.188775 |
| C | -6.626558 | -0.620088 | -2.165161 |
| H | -7.554572 | -0.271560 | -1.663929 |
| H | -6.814011 | -0.631060 | -3.257563 |
| H | -6.465125 | -1.672110 | -1.843065 |
| H | 0.445382  | -5.956615 | 2.343462  |
| H | -1.096491 | -5.728190 | 1.462490  |
| H | -2.961813 | -4.947001 | -2.202833 |
| O | -1.307668 | -0.751138 | 2.022401  |
| C | -1.498654 | -1.210104 | 3.129522  |
| O | -0.645127 | -2.016210 | 3.795239  |
| O | -2.618226 | -0.964942 | 3.854521  |
| C | -1.273204 | -2.488407 | 5.005448  |
| H | -1.584547 | -3.542859 | 4.850060  |
| H | -0.535251 | -2.440465 | 5.828614  |

|   |           |           |          |
|---|-----------|-----------|----------|
| C | -2.463927 | -1.524365 | 5.175133 |
| H | -2.256120 | -0.698242 | 5.887863 |
| H | -3.407806 | -2.026471 | 5.461772 |

E(solv)= -3556.40457919 A.U  
Thermal correction= 0.878703

TS-E

|    |           |           |           |
|----|-----------|-----------|-----------|
| Th | -0.206605 | 1.432119  | 0.260234  |
| N  | -0.182281 | 0.963449  | 2.567817  |
| N  | -2.397637 | 1.785638  | -0.487513 |
| N  | 1.053802  | 2.799080  | -0.980006 |
| C  | 1.763706  | 3.507680  | -1.802452 |
| N  | 2.406600  | 2.964403  | -2.939547 |
| C  | 3.770026  | 3.388428  | -3.326489 |
| C  | 3.849274  | 4.615967  | -4.245282 |
| C  | 3.414323  | 5.903446  | -3.545613 |
| C  | 2.039159  | 5.776565  | -2.872794 |
| N  | 1.978390  | 4.899396  | -1.682154 |
| C  | 2.601923  | 0.501769  | -3.187865 |
| C  | 3.758513  | 0.451042  | -2.216868 |
| C  | 2.165541  | -0.681248 | -3.822218 |
| C  | 1.088209  | -0.696364 | -4.724962 |
| C  | 0.624552  | -1.977108 | -5.384126 |
| C  | 0.435371  | 0.525383  | -4.992097 |
| C  | 0.843658  | 1.734557  | -4.399971 |
| C  | 0.142855  | 3.025462  | -4.755523 |
| C  | 1.790987  | 5.565925  | -0.416982 |
| C  | 0.588051  | 6.273265  | -0.156071 |
| C  | -0.554931 | 6.270029  | -1.144978 |
| C  | 0.473468  | 6.999170  | 1.048484  |
| C  | 1.509484  | 7.040626  | 1.998987  |
| C  | 1.362657  | 7.807073  | 3.294962  |
| C  | 2.690151  | 6.324249  | 1.714570  |
| C  | 2.855744  | 5.589992  | 0.524875  |
| C  | 4.150880  | 4.858295  | 0.260355  |
| H  | 4.373728  | 3.569499  | -2.409971 |
| H  | 4.232081  | 2.528238  | -3.847312 |
| H  | 4.895442  | 4.713007  | -4.610578 |
| H  | 3.219996  | 4.433471  | -5.144604 |
| H  | 4.164844  | 6.200100  | -2.779567 |
| H  | 3.367674  | 6.740104  | -4.277095 |
| H  | 1.718203  | 6.781698  | -2.537774 |
| H  | 1.292827  | 5.430486  | -3.620465 |
| H  | -1.514216 | 6.502692  | -0.643206 |
| H  | -0.649397 | 5.284744  | -1.644212 |
| H  | -0.416795 | 7.030804  | -1.944784 |
| H  | -0.463655 | 7.546267  | 1.248411  |
| H  | 1.187025  | 7.119417  | 4.151150  |
| H  | 2.280611  | 8.384855  | 3.532235  |
| H  | 0.511772  | 8.516102  | 3.258185  |
| H  | 3.520047  | 6.343808  | 2.441579  |
| H  | 4.643173  | 5.225377  | -0.664506 |
| H  | 4.861255  | 4.991862  | 1.099713  |
| H  | 3.983644  | 3.768755  | 0.129204  |
| H  | 3.835229  | -0.551393 | -1.757410 |
| H  | 3.627992  | 1.187875  | -1.400652 |
| H  | 4.729768  | 0.669029  | -2.714145 |
| H  | 2.686374  | -1.624154 | -3.586161 |
| H  | 0.564128  | -1.868907 | -6.488095 |
| H  | -0.391039 | -2.264903 | -5.034907 |
| H  | 1.308245  | -2.821619 | -5.164388 |
| H  | -0.411672 | 0.542077  | -5.698948 |

|    |           |           |           |
|----|-----------|-----------|-----------|
| H  | 0.841277  | 3.753405  | -5.219904 |
| H  | -0.681897 | 2.845273  | -5.472420 |
| H  | -0.288490 | 3.520173  | -3.859940 |
| Si | 1.125046  | 1.682870  | 3.521006  |
| Si | -1.346932 | -0.167532 | 3.276885  |
| C  | 2.235258  | 2.615761  | 2.290022  |
| C  | 2.248305  | 0.442520  | 4.421208  |
| C  | 0.498297  | 2.938441  | 4.810379  |
| C  | -2.354679 | -0.970108 | 1.869955  |
| C  | -0.554734 | -1.597543 | 4.250284  |
| C  | -2.562698 | 0.688097  | 4.472435  |
| H  | 3.137474  | 0.977324  | 4.821307  |
| H  | 1.749222  | -0.058065 | 5.275606  |
| H  | 2.602217  | -0.334182 | 3.713486  |
| H  | 2.735804  | 1.916691  | 1.586677  |
| H  | 3.039351  | 3.139255  | 2.849117  |
| H  | 1.715218  | 3.402389  | 1.700927  |
| H  | -0.127381 | 2.451655  | 5.587717  |
| H  | 1.357292  | 3.419330  | 5.327408  |
| H  | -0.108584 | 3.741165  | 4.342172  |
| H  | 0.255341  | -2.076778 | 3.665046  |
| H  | -0.132529 | -1.261845 | 5.219436  |
| H  | -1.327294 | -2.365169 | 4.475456  |
| H  | -1.691715 | -1.533785 | 1.178454  |
| H  | -3.080187 | -1.691651 | 2.302446  |
| H  | -2.931699 | -0.240967 | 1.263239  |
| H  | -3.367071 | -0.015738 | 4.778660  |
| H  | -2.046786 | 1.023302  | 5.397019  |
| H  | -3.045860 | 1.578705  | 4.020569  |
| Si | -3.208488 | 3.108404  | 0.370544  |
| Si | -3.247672 | 0.933322  | -1.798955 |
| C  | -4.628560 | 2.550721  | 1.508357  |
| C  | -3.924573 | 4.446999  | -0.776110 |
| C  | -1.896168 | 3.915183  | 1.503326  |
| C  | -3.358017 | 1.983997  | -3.382800 |
| C  | -2.363767 | -0.680312 | -2.272496 |
| C  | -5.033477 | 0.450614  | -1.331616 |
| H  | -4.314098 | 1.732837  | 2.188092  |
| H  | -4.969191 | 3.401520  | 2.138076  |
| H  | -5.504466 | 2.190361  | 0.931926  |
| H  | -3.828404 | 1.396494  | -4.201169 |
| H  | -2.346761 | 2.286429  | -3.721162 |
| H  | -3.957554 | 2.906437  | -3.243418 |
| H  | -3.180103 | 4.798268  | -1.518162 |
| H  | -4.809061 | 4.070919  | -1.331562 |
| H  | -4.259129 | 5.322179  | -0.177781 |
| H  | -2.349029 | 4.783868  | 2.027172  |
| H  | -1.003816 | 4.310755  | 0.967782  |
| H  | -1.551396 | 3.217012  | 2.297985  |
| H  | -2.929177 | -1.159302 | -3.101645 |
| H  | -1.320650 | -0.516230 | -2.613875 |
| H  | -2.326701 | -1.392068 | -1.422428 |
| H  | -5.075229 | -0.143445 | -0.394687 |
| H  | -5.466926 | -0.171854 | -2.144644 |
| H  | -5.696308 | 1.332435  | -1.206780 |
| C  | 2.109106  | -1.609716 | 0.597322  |
| O  | 2.426760  | -2.200233 | -0.588335 |
| C  | 1.497117  | -3.270149 | -0.836326 |
| C  | 0.993899  | -3.612966 | 0.576886  |
| O  | 1.272875  | -2.410980 | 1.316882  |
| H  | 0.687532  | -2.880986 | -1.488558 |
| H  | 2.032445  | -4.100163 | -1.336320 |
| H  | -0.093791 | -3.815606 | 0.619226  |
| H  | 1.545515  | -4.456884 | 1.045477  |

|   |          |           |           |
|---|----------|-----------|-----------|
| O | 2.564899 | -0.561451 | 0.991938  |
| C | 1.937671 | 1.717413  | -3.491587 |
| H | 0.136617 | -0.515499 | -0.556661 |

E(solv)= -3556.407302 A.U  
Thermal correction= 0.880939

E-1

|    |           |           |           |
|----|-----------|-----------|-----------|
| C  | 1.176591  | 2.455813  | -0.136164 |
| O  | -0.043929 | 2.021948  | -0.724669 |
| C  | -0.836276 | 3.197433  | -0.964688 |
| O  | 0.113874  | 4.219770  | -1.265606 |
| C  | 1.176639  | 4.001271  | -0.351149 |
| O  | -1.708917 | 2.999948  | -1.964115 |
| Th | -3.407909 | 2.856740  | -3.340642 |
| N  | -2.611177 | 1.683754  | -5.070523 |
| C  | -1.994547 | 0.964330  | -5.957178 |
| N  | -0.707142 | 1.263029  | -6.440426 |
| C  | 0.122345  | 2.212532  | -5.738767 |
| C  | 0.337553  | 3.507274  | -6.284663 |
| C  | 1.240038  | 4.373852  | -5.634773 |
| C  | 1.927442  | 4.000925  | -4.466411 |
| C  | 1.685884  | 2.715358  | -3.945874 |
| C  | 0.795128  | 1.811492  | -4.553084 |
| C  | -0.347962 | 3.976455  | -7.549250 |
| C  | 2.854831  | 4.968186  | -3.767349 |
| C  | 0.575038  | 0.445988  | -3.948560 |
| N  | -3.947018 | 5.132528  | -3.702227 |
| Si | -4.354178 | 6.084815  | -2.260842 |
| C  | -6.111859 | 6.818774  | -2.302255 |
| N  | -4.974418 | 1.658674  | -2.019952 |
| Si | -4.814774 | 0.734235  | -0.510207 |
| C  | -3.287664 | 1.242662  | 0.493031  |
| N  | -2.542283 | -0.210295 | -6.535715 |
| C  | -3.970856 | -0.360911 | -6.645430 |
| C  | -4.678224 | -1.230419 | -5.769452 |
| C  | -6.046139 | -1.470341 | -6.009047 |
| C  | -6.750175 | -0.839993 | -7.053159 |
| C  | -6.039248 | 0.062535  | -7.866373 |
| C  | -4.661550 | 0.306698  | -7.694165 |
| C  | -4.004317 | -1.883786 | -4.583591 |
| C  | -8.216587 | -1.129616 | -7.286215 |
| C  | -3.946064 | 1.243118  | -8.638713 |
| C  | -1.732327 | -1.443948 | -6.644940 |
| C  | -0.881179 | -1.577801 | -7.914391 |
| C  | 0.249666  | -0.553244 | -7.970849 |
| C  | -0.254926 | 0.885963  | -7.797967 |
| Si | -3.719501 | 5.952289  | -5.259006 |
| C  | -1.981328 | 6.714444  | -5.392064 |
| C  | -4.972395 | 7.344660  | -5.612016 |
| C  | -3.941216 | 4.677759  | -6.656546 |
| C  | -3.135550 | 7.510423  | -1.937603 |
| C  | -4.269188 | 4.943181  | -0.735705 |
| Si | -6.552718 | 1.760469  | -2.809229 |
| C  | -7.755493 | 2.989813  | -1.995925 |
| C  | -7.475251 | 0.108202  | -2.973098 |
| C  | -6.202727 | 2.423789  | -4.575287 |
| C  | -4.651917 | -1.136265 | -0.837566 |
| C  | -6.310685 | 0.970545  | 0.652323  |
| H  | -1.079164 | -1.535923 | -5.748081 |
| H  | -2.440671 | -2.292613 | -6.610401 |
| H  | -0.469218 | -2.610423 | -7.950582 |
| H  | -1.541394 | -1.471090 | -8.804184 |

|   |           |           |           |
|---|-----------|-----------|-----------|
| H | 0.776032  | -0.619058 | -8.948353 |
| H | 1.012135  | -0.768786 | -7.189562 |
| H | 0.569717  | 1.577349  | -8.051344 |
| H | -1.074313 | 1.077544  | -8.524451 |
| H | -1.327971 | 3.484052  | -7.697222 |
| H | 0.264318  | 3.769626  | -8.455021 |
| H | -0.516099 | 5.070952  | -7.519086 |
| H | 1.405154  | 5.378189  | -6.060660 |
| H | 3.672626  | 4.441263  | -3.233783 |
| H | 3.315090  | 5.685434  | -4.477140 |
| H | 2.295929  | 5.564962  | -3.013320 |
| H | 2.216683  | 2.393417  | -3.035288 |
| H | 0.744071  | -0.363616 | -4.689234 |
| H | 1.249334  | 0.279157  | -3.087283 |
| H | -0.465886 | 0.338318  | -3.576932 |
| H | -3.479139 | 2.094374  | -8.101074 |
| H | -3.135465 | 0.720873  | -9.189752 |
| H | -4.647058 | 1.664083  | -9.386038 |
| H | -6.567811 | 0.581127  | -8.684285 |
| H | -8.656881 | -0.440011 | -8.033911 |
| H | -8.369174 | -2.166566 | -7.657516 |
| H | -8.803364 | -1.036768 | -6.347966 |
| H | -6.583472 | -2.165045 | -5.341034 |
| H | -3.565405 | -2.874819 | -4.833316 |
| H | -3.188735 | -1.246673 | -4.188808 |
| H | -4.730793 | -2.052849 | -3.765422 |
| H | -1.836772 | 7.514352  | -4.636487 |
| H | -1.816934 | 7.165414  | -6.394970 |
| H | -1.193055 | 5.952116  | -5.219268 |
| H | -3.348249 | 3.753543  | -6.482752 |
| H | -3.613858 | 5.108782  | -7.626551 |
| H | -5.005110 | 4.379454  | -6.763642 |
| H | -4.819454 | 7.714183  | -6.649536 |
| H | -6.021292 | 6.990464  | -5.531343 |
| H | -4.850214 | 8.214142  | -4.932955 |
| H | -6.217192 | 7.612058  | -3.069206 |
| H | -6.878321 | 6.044366  | -2.514259 |
| H | -6.354836 | 7.271658  | -1.316472 |
| H | -3.177047 | 8.294003  | -2.723180 |
| H | -2.092998 | 7.132779  | -1.882988 |
| H | -3.373148 | 8.001576  | -0.968996 |
| H | -4.875347 | 4.016317  | -0.835100 |
| H | -3.226620 | 4.647779  | -0.496793 |
| H | -4.663416 | 5.492497  | 0.145530  |
| H | -5.888654 | 3.494145  | -4.593037 |
| H | -5.465960 | 1.807981  | -5.143398 |
| H | -7.141662 | 2.388760  | -5.165916 |
| H | -6.868412 | -0.646181 | -3.511354 |
| H | -8.418035 | 0.258501  | -3.542217 |
| H | -7.748924 | -0.307173 | -1.980894 |
| H | -8.669605 | 3.107817  | -2.617556 |
| H | -7.294395 | 3.991993  | -1.879384 |
| H | -8.074816 | 2.648341  | -0.990251 |
| H | -5.528249 | -1.543405 | -1.383195 |
| H | -4.565559 | -1.689796 | 0.122692  |
| H | -3.743410 | -1.360070 | -1.435060 |
| H | -7.263565 | 0.599603  | 0.219921  |
| H | -6.453408 | 2.037157  | 0.925827  |
| H | -6.136869 | 0.404735  | 1.593364  |
| H | -3.324930 | 2.314022  | 0.781385  |
| H | -3.266474 | 0.647520  | 1.431744  |
| H | -2.330175 | 1.061567  | -0.036196 |
| H | 1.227272  | 2.193090  | 0.946391  |
| H | 2.022994  | 1.949728  | -0.650473 |

|   |           |          |           |
|---|-----------|----------|-----------|
| H | 1.000018  | 4.536958 | 0.613758  |
| H | 2.115174  | 4.387917 | -0.796518 |
| H | -1.369005 | 3.470707 | -0.009375 |

E(solv)= -3556.467894 A.U  
Thermal correction= 0.887923

E-2

|    |           |          |           |
|----|-----------|----------|-----------|
| Th | 2.687692  | 4.058587 | 6.994224  |
| Si | -0.264081 | 2.556472 | 6.216681  |
| Si | -0.705159 | 5.281711 | 7.697497  |
| Si | 3.359704  | 1.515493 | 9.367148  |
| Si | 5.490545  | 1.723668 | 7.173855  |
| N  | 3.462567  | 5.086639 | 5.164989  |
| N  | 4.757288  | 6.916696 | 4.348889  |
| N  | 3.732829  | 5.443396 | 2.817040  |
| N  | 0.321844  | 4.021134 | 6.999305  |
| O  | 3.096157  | 5.423456 | 8.623075  |
| N  | 3.935853  | 2.231320 | 7.853885  |
| C  | 3.948065  | 5.771542 | 4.177693  |
| C  | 4.677764  | 8.082721 | 3.440121  |
| H  | 5.022743  | 8.955595 | 4.026432  |
| H  | 3.614552  | 8.273160 | 3.175027  |
| C  | 5.511823  | 7.998859 | 2.154468  |
| H  | 6.568124  | 7.770389 | 2.419508  |
| H  | 5.518224  | 9.004980 | 1.680540  |
| C  | 4.974232  | 6.957565 | 1.174791  |
| H  | 3.990796  | 7.280638 | 0.766047  |
| H  | 5.659388  | 6.861142 | 0.303988  |
| C  | 4.815658  | 5.572732 | 1.818301  |
| H  | 4.601715  | 4.838978 | 1.019582  |
| H  | 5.778068  | 5.267792 | 2.285434  |
| C  | 5.387826  | 7.160729 | 5.626030  |
| C  | 4.815227  | 8.086603 | 6.540182  |
| C  | 5.516852  | 8.393686 | 7.722496  |
| H  | 5.074666  | 9.116486 | 8.429204  |
| C  | 6.751189  | 7.793685 | 8.042108  |
| C  | 7.278921  | 6.858323 | 7.130521  |
| H  | 8.243218  | 6.372426 | 7.356443  |
| C  | 6.628461  | 6.537116 | 5.920600  |
| C  | 3.483487  | 8.747452 | 6.264184  |
| H  | 3.586290  | 9.647061 | 5.618397  |
| H  | 3.005668  | 9.083142 | 7.205402  |
| H  | 2.787317  | 8.054014 | 5.752717  |
| C  | 7.477033  | 8.156006 | 9.318994  |
| H  | 6.776759  | 8.215440 | 10.178015 |
| H  | 7.966556  | 9.151040 | 9.232964  |
| H  | 8.267009  | 7.418566 | 9.564831  |
| C  | 7.267019  | 5.567059 | 4.954124  |
| H  | 6.616966  | 4.688830 | 4.761397  |
| H  | 8.232227  | 5.192084 | 5.346980  |
| H  | 7.461207  | 6.044667 | 3.970685  |
| C  | 2.553147  | 4.720991 | 2.413200  |
| C  | 2.640407  | 3.381168 | 1.943836  |
| C  | 1.481740  | 2.762727 | 1.424200  |
| H  | 1.561777  | 1.725737 | 1.055185  |
| C  | 0.239932  | 3.415645 | 1.364774  |
| C  | 0.170608  | 4.727533 | 1.879239  |
| H  | -0.792548 | 5.265657 | 1.856726  |
| C  | 1.295150  | 5.392227 | 2.401007  |
| C  | 3.930773  | 2.591975 | 1.967660  |
| H  | 4.489457  | 2.672833 | 1.008513  |
| H  | 3.722617  | 1.514078 | 2.121761  |

|   |           |           |           |
|---|-----------|-----------|-----------|
| H | 4.606878  | 2.927612  | 2.775771  |
| C | 1.151438  | 6.805670  | 2.911866  |
| H | 1.433903  | 6.881464  | 3.983396  |
| H | 0.106841  | 7.158980  | 2.809402  |
| H | 1.804620  | 7.509829  | 2.354388  |
| C | -1.080182 | 1.326846  | 7.417308  |
| H | -0.402647 | 1.042772  | 8.248905  |
| H | -1.993723 | 1.770053  | 7.868235  |
| C | 1.294951  | 1.728906  | 5.455923  |
| H | 1.765812  | 2.373302  | 4.675846  |
| H | 0.985211  | 0.802159  | 4.928852  |
| H | 2.076598  | 1.404661  | 6.183269  |
| C | -1.461841 | 2.828997  | 4.770551  |
| H | -2.444052 | 3.215494  | 5.108544  |
| H | -1.641902 | 1.864292  | 4.248514  |
| H | -1.036120 | 3.542437  | 4.035205  |
| C | -2.480430 | 5.316285  | 7.007690  |
| H | -2.498233 | 5.482314  | 5.910720  |
| C | 0.069115  | 6.980826  | 7.327023  |
| C | -0.853096 | 5.101399  | 9.587188  |
| H | -1.313388 | 4.129935  | 9.866193  |
| H | -1.483599 | 5.909946  | 10.016291 |
| H | 0.143063  | 5.148485  | 10.074070 |
| C | 5.898139  | -0.121687 | 7.415352  |
| H | 6.006405  | -0.406902 | 8.482269  |
| H | 6.864096  | -0.350296 | 6.914503  |
| H | 5.123205  | -0.775299 | 6.963075  |
| C | 6.930681  | 2.735241  | 7.899112  |
| H | 6.784602  | 3.824090  | 7.733495  |
| H | 7.898860  | 2.447102  | 7.435079  |
| H | 7.021288  | 2.576024  | 8.994048  |
| C | 5.433699  | 2.012453  | 5.294458  |
| H | 4.740752  | 1.291634  | 4.811732  |
| H | 6.436704  | 1.876147  | 4.836901  |
| H | 5.080541  | 3.035308  | 5.036380  |
| C | 2.700922  | -0.257114 | 9.137327  |
| H | 1.915585  | -0.297014 | 8.353166  |
| H | 2.251904  | -0.631591 | 10.082830 |
| H | 3.502666  | -0.965062 | 8.844099  |
| C | 1.911546  | 2.568091  | 10.025338 |
| H | 2.265534  | 3.526389  | 10.457632 |
| H | 1.394415  | 2.010182  | 10.834772 |
| H | 1.131761  | 2.811435  | 9.269065  |
| C | 4.674036  | 1.487848  | 10.744195 |
| H | 5.540027  | 0.840967  | 10.492294 |
| H | 4.233128  | 1.098241  | 11.687310 |
| H | 5.061989  | 2.507933  | 10.948493 |
| C | -0.985004 | 2.745643  | 0.784401  |
| H | -1.796441 | 2.664867  | 1.539237  |
| H | -1.397156 | 3.326199  | -0.068758 |
| H | -0.759033 | 1.723817  | 0.419776  |
| H | -3.037531 | 6.152156  | 7.484132  |
| H | -3.041542 | 4.382939  | 7.225173  |
| H | -1.386128 | 0.396460  | 6.891776  |
| C | 3.786734  | 5.973312  | 9.707398  |
| C | 3.058902  | 7.207476  | 10.256076 |
| H | 3.897695  | 5.224767  | 10.531936 |
| H | 4.813997  | 6.282583  | 9.406811  |
| O | 3.887639  | 7.875054  | 11.227291 |
| H | 2.869420  | 7.931194  | 9.437808  |
| H | 2.078863  | 6.929120  | 10.706862 |
| H | -0.487330 | 7.793082  | 7.841761  |
| H | 1.123780  | 7.026622  | 7.672015  |
| H | 0.054255  | 7.198664  | 6.238073  |

|   |          |          |           |
|---|----------|----------|-----------|
| C | 3.562886 | 7.757876 | 12.540977 |
| O | 4.224329 | 8.240887 | 13.424717 |
| H | 2.608982 | 7.172211 | 12.693503 |

E(solv)= -3556.474772 A.U  
Thermal correction= 0.881462  
TS-F

|    |           |           |           |
|----|-----------|-----------|-----------|
| Th | 0.687409  | -1.005412 | 0.404026  |
| N  | -1.113752 | -2.098613 | -0.402340 |
| C  | -2.095359 | -2.720999 | -0.966969 |
| N  | -2.611592 | -2.354657 | -2.239414 |
| C  | -4.041290 | -2.498567 | -2.594419 |
| C  | -4.484648 | -3.881906 | -3.087020 |
| C  | -4.495746 | -4.917815 | -1.967606 |
| C  | -3.146766 | -5.004716 | -1.242355 |
| N  | -2.773057 | -3.843242 | -0.407924 |
| C  | -2.902900 | -3.995271 | 1.019033  |
| C  | -3.742091 | -3.093154 | 1.738352  |
| C  | -3.938330 | -3.289126 | 3.117366  |
| C  | -3.349148 | -4.358257 | 3.819926  |
| C  | -2.532151 | -5.237219 | 3.090177  |
| C  | -2.288134 | -5.080218 | 1.708643  |
| C  | -1.388237 | -6.089412 | 1.028041  |
| C  | -4.464318 | -1.965319 | 1.044311  |
| C  | -3.567001 | -4.528883 | 5.306126  |
| H  | -5.093924 | -2.347021 | 0.213310  |
| H  | -5.127510 | -1.432422 | 1.752364  |
| H  | -3.766312 | -1.215554 | 0.617701  |
| H  | -0.838057 | -5.653464 | 0.172964  |
| H  | -0.644265 | -6.490058 | 1.744859  |
| H  | -1.955987 | -6.966530 | 0.644303  |
| H  | -2.049790 | -6.080569 | 3.613578  |
| H  | -4.596993 | -2.587831 | 3.657565  |
| H  | -3.303853 | -5.550949 | 5.645546  |
| H  | -4.622165 | -4.333697 | 5.590427  |
| H  | -2.939183 | -3.815153 | 5.883654  |
| C  | -1.832212 | -1.564813 | -3.156892 |
| C  | -0.750807 | -2.163348 | -3.861973 |
| C  | -0.122486 | -1.435786 | -4.892509 |
| C  | -0.526007 | -0.134585 | -5.250660 |
| C  | -1.557133 | 0.458341  | -4.495975 |
| C  | -2.212897 | -0.222646 | -3.449106 |
| C  | -3.299772 | 0.491570  | -2.673592 |
| H  | -3.181438 | 1.589929  | -2.761591 |
| H  | -3.283152 | 0.225471  | -1.597601 |
| H  | -4.318228 | 0.255329  | -3.052804 |
| H  | -1.865259 | 1.493113  | -4.724946 |
| C  | 0.107666  | 0.592448  | -6.417391 |
| H  | 0.125913  | 1.690621  | -6.258708 |
| H  | 1.147103  | 0.251697  | -6.601825 |
| H  | -0.461894 | 0.413010  | -7.356347 |
| H  | 0.696992  | -1.919646 | -5.450891 |
| C  | -0.272936 | -3.552626 | -3.528159 |
| H  | 0.459068  | -3.916664 | -4.275032 |
| H  | 0.219891  | -3.563466 | -2.532330 |
| H  | -1.113847 | -4.274814 | -3.483045 |
| N  | 1.545257  | -0.481353 | 2.588168  |
| Si | 2.793345  | 0.763372  | 2.480417  |
| Si | 1.120734  | -1.033144 | 4.225537  |
| C  | 2.249790  | 2.505264  | 3.023048  |
| C  | 4.404592  | 0.331407  | 3.402096  |
| C  | 3.302321  | 0.977502  | 0.645860  |
| C  | 2.370961  | -2.315656 | 4.902232  |



|    |           |           |           |
|----|-----------|-----------|-----------|
| C  | 1.066068  | 0.365869  | 5.521029  |
| C  | -0.602807 | -1.833203 | 4.306777  |
| H  | -1.386435 | -1.056670 | 4.204504  |
| H  | -0.794282 | -2.617711 | 3.547432  |
| H  | -0.719240 | -2.307038 | 5.305809  |
| H  | 0.720321  | -0.052416 | 6.491414  |
| H  | 2.051444  | 0.843985  | 5.701251  |
| H  | 0.343715  | 1.145753  | 5.204762  |
| H  | 2.443853  | -3.226455 | 4.272508  |
| H  | 3.391844  | -1.889918 | 4.987094  |
| H  | 2.058103  | -2.639633 | 5.919255  |
| H  | 2.069942  | 2.577137  | 4.113840  |
| H  | 3.028652  | 3.252915  | 2.756547  |
| H  | 1.306681  | 2.778934  | 2.507485  |
| H  | 4.264353  | 0.294291  | 4.502477  |
| H  | 4.802978  | -0.652135 | 3.076551  |
| H  | 5.179638  | 1.101055  | 3.194486  |
| H  | 4.217285  | 1.606312  | 0.618656  |
| H  | 3.563738  | 0.024213  | 0.143451  |
| H  | 2.544122  | 1.505053  | 0.034866  |
| N  | 2.507742  | -2.392238 | -0.482198 |
| Si | 2.416594  | -3.951198 | 0.353794  |
| Si | 3.921578  | -2.212776 | -1.542950 |
| C  | 3.790057  | -0.824013 | -2.841114 |
| C  | 4.293638  | -3.768807 | -2.592291 |
| C  | 5.544625  | -1.856455 | -0.593865 |
| C  | 3.987713  | -4.456610 | 1.307125  |
| C  | 1.932244  | -5.444202 | -0.733278 |
| C  | 1.051271  | -3.794534 | 1.674188  |
| H  | 4.604167  | -4.639571 | -1.978827 |
| H  | 5.132949  | -3.541889 | -3.285188 |
| H  | 3.422423  | -4.077778 | -3.206947 |
| H  | 4.710033  | -0.858981 | -3.463619 |
| H  | 3.731892  | 0.187901  | -2.393554 |
| H  | 2.918990  | -0.975810 | -3.510664 |
| H  | 5.812870  | -2.677732 | 0.100572  |
| H  | 6.379761  | -1.745431 | -1.319920 |
| H  | 5.498240  | -0.921823 | 0.001693  |
| H  | 4.829560  | -4.721864 | 0.634170  |
| H  | 3.773699  | -5.350120 | 1.933228  |
| H  | 4.327826  | -3.642813 | 1.980421  |
| H  | 2.722797  | -5.724916 | -1.456826 |
| H  | 1.744928  | -6.327287 | -0.084295 |
| H  | 1.005824  | -5.244864 | -1.310307 |
| H  | 0.971353  | -4.748922 | 2.232344  |
| H  | 0.032935  | -3.596163 | 1.267470  |
| H  | 1.312840  | -3.026322 | 2.429219  |
| H  | -4.235019 | -1.772686 | -3.404306 |
| H  | -4.670709 | -2.192851 | -1.731574 |
| H  | -3.812103 | -4.207440 | -3.912075 |
| H  | -5.499862 | -3.781106 | -3.530469 |
| H  | -4.738308 | -5.924666 | -2.373746 |
| H  | -5.289988 | -4.678066 | -1.225631 |
| H  | -2.339152 | -5.198517 | -1.982957 |
| H  | -3.176174 | -5.883510 | -0.574917 |
| O  | -0.270749 | 1.090786  | 0.389962  |
| C  | -0.695930 | 2.097813  | -0.473565 |
| B  | -1.828954 | 0.694716  | 1.943082  |
| H  | -1.525734 | -0.478364 | 1.810395  |
| O  | -2.947141 | 1.241201  | 1.309530  |
| C  | -3.553985 | 2.208616  | 2.212922  |
| C  | -2.379619 | 2.522812  | 3.252963  |
| O  | -1.517311 | 1.360593  | 3.120692  |
| C  | -4.767114 | 1.517280  | 2.860504  |

|   |           |          |           |
|---|-----------|----------|-----------|
| C | -1.561747 | 3.777793 | 2.907093  |
| C | -4.032465 | 3.416815 | 1.399778  |
| C | -2.831411 | 2.611147 | 4.717280  |
| H | -5.322226 | 2.199438 | 3.535672  |
| H | -5.459418 | 1.184100 | 2.061234  |
| H | -4.459331 | 0.623637 | 3.438525  |
| H | -1.195275 | 3.754992 | 1.862729  |
| H | -0.675518 | 3.825437 | 3.570366  |
| H | -2.153343 | 4.704715 | 3.051369  |
| H | -3.210213 | 3.886672 | 0.827560  |
| H | -4.481881 | 4.187526 | 2.059726  |
| H | -1.950650 | 2.795902 | 5.364982  |
| H | -3.544570 | 3.448198 | 4.866873  |
| H | -3.308483 | 1.673880 | 5.059814  |
| H | -4.808652 | 3.094709 | 0.675948  |
| H | -1.259709 | 2.874146 | 0.098832  |
| C | 0.414491  | 2.867537 | -1.195364 |
| H | -1.417096 | 1.726624 | -1.240172 |
| H | 0.064577  | 3.883778 | -1.461437 |
| H | 1.315891  | 2.961234 | -0.555150 |
| O | 0.835457  | 2.337071 | -2.499333 |
| C | 1.128648  | 1.059434 | -2.660238 |
| O | 1.102724  | 0.178201 | -1.805854 |
| H | 1.432398  | 0.861563 | -3.711128 |

E(solv)= -3968.331428 A.U  
Thermal correction= 1.064743

F

|    |           |           |           |
|----|-----------|-----------|-----------|
| Th | 0.776173  | -1.066093 | 0.579764  |
| N  | -0.997412 | -2.162211 | -0.255651 |
| C  | -2.076542 | -2.634979 | -0.791590 |
| N  | -2.713414 | -2.052196 | -1.932752 |
| C  | -4.180627 | -1.858525 | -1.911617 |
| C  | -5.015391 | -3.024264 | -2.460672 |
| C  | -4.980943 | -4.243899 | -1.543474 |
| C  | -3.546994 | -4.669663 | -1.205271 |
| N  | -2.780082 | -3.765561 | -0.316638 |
| C  | -2.589767 | -4.274484 | 1.022262  |
| C  | -3.289686 | -3.679120 | 2.105810  |
| C  | -3.218647 | -4.287854 | 3.373424  |
| C  | -2.474847 | -5.461768 | 3.605828  |
| C  | -1.780373 | -6.021008 | 2.517835  |
| C  | -1.821463 | -5.451966 | 1.228320  |
| C  | -1.070863 | -6.117353 | 0.097219  |
| C  | -4.107859 | -2.425470 | 1.914078  |
| C  | -2.399082 | -6.073597 | 4.987076  |
| H  | -4.953390 | -2.590812 | 1.213089  |
| H  | -4.532374 | -2.079194 | 2.876276  |
| H  | -3.494451 | -1.600409 | 1.496083  |
| H  | -0.757577 | -5.382219 | -0.668969 |
| H  | -0.167442 | -6.636298 | 0.473456  |
| H  | -1.690852 | -6.884082 | -0.418310 |
| H  | -1.182045 | -6.935573 | 2.671391  |
| H  | -3.769591 | -3.824410 | 4.209122  |
| H  | -2.117759 | -7.145276 | 4.946832  |
| H  | -3.366821 | -5.991284 | 5.523587  |
| H  | -1.637959 | -5.556640 | 5.612333  |
| C  | -1.993750 | -1.500576 | -3.043265 |
| C  | -1.093554 | -2.322403 | -3.794584 |
| C  | -0.555076 | -1.833559 | -5.001431 |
| C  | -0.885113 | -0.566279 | -5.524877 |
| C  | -1.714092 | 0.250638  | -4.736761 |

|    |           |           |           |
|----|-----------|-----------|-----------|
| C  | -2.238639 | -0.162864 | -3.490600 |
| C  | -2.998877 | 0.865952  | -2.679656 |
| H  | -2.586206 | 1.874433  | -2.884813 |
| H  | -2.924972 | 0.702663  | -1.586091 |
| H  | -4.077884 | 0.916145  | -2.949832 |
| H  | -1.939265 | 1.275546  | -5.078941 |
| C  | -0.372489 | -0.116222 | -6.874940 |
| H  | -0.388759 | 0.988198  | -6.973400 |
| H  | 0.665278  | -0.463851 | -7.058146 |
| H  | -0.998964 | -0.526899 | -7.697686 |
| H  | 0.123196  | -2.491659 | -5.570442 |
| C  | -0.726452 | -3.719510 | -3.359472 |
| H  | -0.006788 | -4.174228 | -4.066726 |
| H  | -0.268089 | -3.728561 | -2.348857 |
| H  | -1.619746 | -4.377699 | -3.321014 |
| N  | 1.432030  | -0.451856 | 2.780148  |
| Si | 2.777858  | 0.695378  | 2.899075  |
| Si | 0.588025  | -0.815935 | 4.305043  |
| C  | 2.228506  | 2.495738  | 3.204152  |
| C  | 4.072661  | 0.247024  | 4.223579  |
| C  | 3.740700  | 0.670172  | 1.254083  |
| C  | 1.515319  | -2.112592 | 5.359940  |
| C  | 0.319855  | 0.704759  | 5.416156  |
| C  | -1.143403 | -1.507318 | 3.951459  |
| H  | -1.814179 | -0.692858 | 3.611397  |
| H  | -1.166123 | -2.310916 | 3.186893  |
| H  | -1.568130 | -1.940876 | 4.881729  |
| H  | -0.339286 | 0.420907  | 6.265430  |
| H  | 1.257723  | 1.111806  | 5.847239  |
| H  | -0.183008 | 1.503465  | 4.833748  |
| H  | 1.615955  | -3.092310 | 4.848671  |
| H  | 2.534577  | -1.772815 | 5.635998  |
| H  | 0.953752  | -2.286994 | 6.304052  |
| H  | 2.180143  | 2.734130  | 4.286391  |
| H  | 2.943298  | 3.209247  | 2.739178  |
| H  | 1.213497  | 2.665611  | 2.787508  |
| H  | 3.665303  | 0.315503  | 5.253537  |
| H  | 4.468593  | -0.780013 | 4.079793  |
| H  | 4.927682  | 0.954988  | 4.160082  |
| H  | 4.556234  | 1.422961  | 1.301015  |
| H  | 4.192067  | -0.323766 | 1.066725  |
| H  | 3.143717  | 0.927954  | 0.352627  |
| N  | 2.678293  | -2.294139 | -0.207552 |
| Si | 2.789060  | -3.780145 | 0.745474  |
| Si | 3.780008  | -2.149996 | -1.595387 |
| C  | 4.431017  | -0.391291 | -1.963153 |
| C  | 2.955805  | -2.801512 | -3.184060 |
| C  | 5.413722  | -3.125230 | -1.386576 |
| C  | 4.296395  | -3.889868 | 1.900971  |
| C  | 2.702646  | -5.379056 | -0.290302 |
| C  | 1.261754  | -3.799842 | 1.892795  |
| H  | 2.690990  | -3.874350 | -3.078332 |
| H  | 3.631659  | -2.702981 | -4.061010 |
| H  | 2.020678  | -2.245828 | -3.400728 |
| H  | 5.009796  | -0.438241 | -2.911484 |
| H  | 5.124116  | -0.042999 | -1.170531 |
| H  | 3.648517  | 0.380171  | -2.091498 |
| H  | 5.280149  | -4.214712 | -1.231007 |
| H  | 6.017101  | -2.998495 | -2.311926 |
| H  | 6.019453  | -2.732166 | -0.543003 |
| H  | 5.253608  | -3.971225 | 1.348300  |
| H  | 4.210383  | -4.783126 | 2.557324  |
| H  | 4.353710  | -2.995123 | 2.555543  |
| H  | 3.572920  | -5.499305 | -0.967315 |

|   |           |           |           |
|---|-----------|-----------|-----------|
| H | 2.679429  | -6.266654 | 0.378798  |
| H | 1.785950  | -5.398076 | -0.914732 |
| H | 1.220055  | -4.769795 | 2.429899  |
| H | 0.282086  | -3.716835 | 1.366403  |
| H | 1.333187  | -3.021965 | 2.681639  |
| H | -4.407659 | -0.959698 | -2.508214 |
| H | -4.489120 | -1.626738 | -0.870735 |
| H | -4.637553 | -3.291036 | -3.473305 |
| H | -6.061613 | -2.672545 | -2.598538 |
| H | -5.493235 | -5.106050 | -2.024432 |
| H | -5.534311 | -4.037804 | -0.600630 |
| H | -2.981943 | -4.823561 | -2.149448 |
| H | -3.581150 | -5.649541 | -0.692973 |
| O | 0.005755  | 1.321202  | 0.312800  |
| C | 0.310113  | 2.594144  | -0.234105 |
| B | -1.245740 | 1.253742  | 1.203552  |
| H | -1.235575 | 0.007257  | 1.481059  |
| O | -2.424608 | 1.682723  | 0.467073  |
| C | -3.293192 | 2.385383  | 1.368571  |
| C | -2.277149 | 3.003782  | 2.432623  |
| O | -1.172638 | 2.084691  | 2.394123  |
| C | -4.266816 | 1.373303  | 2.007172  |
| C | -1.778278 | 4.411646  | 2.041924  |
| C | -4.098279 | 3.423787  | 0.574454  |
| C | -2.823479 | 3.065648  | 3.868404  |
| H | -5.018182 | 1.865141  | 2.658521  |
| H | -4.806731 | 0.838395  | 1.199372  |
| H | -3.722397 | 0.620497  | 2.610609  |
| H | -1.436966 | 4.455453  | 0.989480  |
| H | -0.919240 | 4.679277  | 2.690809  |
| H | -2.563818 | 5.183921  | 2.177546  |
| H | -3.438305 | 4.083136  | -0.020885 |
| H | -4.713538 | 4.056779  | 1.247481  |
| H | -2.062748 | 3.515571  | 4.539068  |
| H | -3.738739 | 3.691907  | 3.927685  |
| H | -3.058481 | 2.058055  | 4.260054  |
| H | -4.785722 | 2.909745  | -0.128820 |
| H | 0.713282  | 3.265480  | 0.559681  |
| C | 1.344242  | 2.553254  | -1.342544 |
| H | -0.629043 | 3.048926  | -0.620353 |
| H | 1.592853  | 3.586657  | -1.651053 |
| H | 2.275779  | 2.038602  | -1.030215 |
| O | 0.854026  | 1.924811  | -2.569477 |
| C | 0.868849  | 0.603258  | -2.635090 |
| O | 1.243766  | -0.146889 | -1.733212 |
| H | 0.521963  | 0.239889  | -3.627342 |

E(solv)= -3968.354444 A.U  
 Thermal correction= 1.065730

BpinOROCOH

|   |           |           |           |
|---|-----------|-----------|-----------|
| C | -0.129159 | 0.005823  | -0.010344 |
| C | -0.052400 | -0.063648 | 1.579310  |
| C | 1.223067  | -0.011729 | -0.725476 |
| C | -0.987992 | 1.175359  | -0.518754 |
| C | 1.161836  | -0.859779 | 2.086641  |
| C | -0.131540 | 1.290139  | 2.288653  |
| B | -1.558875 | -1.578122 | 0.797625  |
| O | -2.493843 | -2.574868 | 0.836450  |
| O | -1.241935 | -0.836860 | 1.916907  |
| O | -0.848011 | -1.222873 | -0.337493 |
| H | -0.085297 | 1.138759  | 3.386106  |
| H | 0.719016  | 1.941000  | 1.998052  |

|   |           |           |           |
|---|-----------|-----------|-----------|
| H | -1.076641 | 1.819229  | 2.062387  |
| H | 1.033837  | -1.056484 | 3.169940  |
| H | 1.247399  | -1.838603 | 1.572501  |
| H | 2.110294  | -0.303752 | 1.943172  |
| H | 1.067618  | 0.024044  | -1.822964 |
| H | 1.833358  | 0.869682  | -0.439156 |
| H | 1.797145  | -0.929304 | -0.496074 |
| H | -1.966013 | 1.212256  | 0.002644  |
| H | -0.481198 | 2.151508  | -0.379588 |
| H | -1.181420 | 1.036752  | -1.601617 |
| C | -2.845017 | -3.275273 | -0.353300 |
| C | -4.049364 | -2.597222 | -1.016858 |
| H | -1.995934 | -3.313983 | -1.069705 |
| H | -3.116779 | -4.312173 | -0.064709 |
| O | -4.394553 | -3.272809 | -2.249315 |
| H | -4.918480 | -2.595421 | -0.328343 |
| H | -3.791879 | -1.559730 | -1.308285 |
| C | -5.310424 | -4.267398 | -2.165212 |
| H | -5.473231 | -4.679307 | -3.194469 |
| O | -5.867447 | -4.648158 | -1.159948 |

E(solv)= -754.281981 A.U

Thermal correction= 0.212861

TS-G

|    |           |           |           |
|----|-----------|-----------|-----------|
| Th | -0.147934 | -0.116446 | 0.231221  |
| Si | 0.171077  | 1.456651  | 3.389640  |
| Si | 2.825996  | 0.365690  | 2.242809  |
| Si | 1.065716  | -2.335562 | -2.357912 |
| Si | 0.714605  | -3.471960 | 0.516571  |
| N  | -2.322225 | 0.084680  | -0.204249 |
| N  | -4.082496 | 1.131579  | -1.436579 |
| N  | -4.615940 | -0.518760 | 0.141654  |
| N  | 1.074264  | 0.605514  | 2.124004  |
| H  | 0.831571  | 0.988213  | -1.317270 |
| N  | 0.595537  | -2.145577 | -0.647938 |
| C  | -3.583495 | 0.224247  | -0.479262 |
| C  | -5.342429 | 1.873964  | -1.208327 |
| H  | -5.250080 | 2.825946  | -1.765966 |
| H  | -5.422226 | 2.139133  | -0.131239 |
| C  | -6.627207 | 1.159692  | -1.652919 |
| H  | -6.519621 | 0.849964  | -2.715972 |
| H  | -7.463823 | 1.891972  | -1.623309 |
| C  | -6.956489 | -0.049161 | -0.777410 |
| H  | -7.273125 | 0.284266  | 0.235679  |
| H  | -7.816541 | -0.610194 | -1.204907 |
| C  | -5.773000 | -1.018091 | -0.635564 |
| H  | -6.127085 | -1.932490 | -0.120486 |
| H  | -5.427893 | -1.327874 | -1.646448 |
| C  | -3.211589 | 1.659092  | -2.460145 |
| C  | -2.607518 | 2.933510  | -2.298504 |
| C  | -1.839724 | 3.456070  | -3.360125 |
| H  | -1.358420 | 4.438549  | -3.224871 |
| C  | -1.653838 | 2.755398  | -4.565875 |
| C  | -2.253578 | 1.486068  | -4.689356 |
| H  | -2.115596 | 0.911446  | -5.621059 |
| C  | -3.035339 | 0.924302  | -3.662361 |
| C  | -2.779747 | 3.745634  | -1.035232 |
| H  | -3.566291 | 4.524238  | -1.153500 |
| H  | -1.833590 | 4.254645  | -0.768341 |
| H  | -3.063887 | 3.108295  | -0.176493 |
| C  | -0.863653 | 3.354955  | -5.709018 |
| H  | -0.058668 | 4.030312  | -5.353875 |

|   |           |           |           |
|---|-----------|-----------|-----------|
| H | -1.520111 | 3.958582  | -6.375056 |
| H | -0.399551 | 2.568892  | -6.339330 |
| C | -3.687323 | -0.424694 | -3.865011 |
| H | -4.795729 | -0.347831 | -3.862558 |
| H | -3.412050 | -1.141679 | -3.063663 |
| H | -3.382485 | -0.867685 | -4.833290 |
| C | -4.383934 | -1.151544 | 1.416595  |
| C | -4.000159 | -2.517049 | 1.477818  |
| C | -3.860450 | -3.128123 | 2.741808  |
| H | -3.563372 | -4.189808 | 2.784984  |
| C | -4.079379 | -2.425920 | 3.941766  |
| C | -4.463059 | -1.072848 | 3.849412  |
| H | -4.655148 | -0.503250 | 4.774719  |
| C | -4.630024 | -0.421608 | 2.611568  |
| C | -3.760483 | -3.319542 | 0.219937  |
| H | -4.712373 | -3.645691 | -0.252967 |
| H | -3.181460 | -4.236502 | 0.441377  |
| H | -3.205377 | -2.726736 | -0.535087 |
| C | -5.100560 | 1.014716  | 2.574728  |
| H | -4.410754 | 1.662701  | 1.996727  |
| H | -5.177028 | 1.431328  | 3.598354  |
| H | -6.100944 | 1.100260  | 2.100079  |
| C | 0.124424  | 0.493201  | 5.033112  |
| H | -0.237642 | -0.545647 | 4.884627  |
| H | 1.125287  | 0.437165  | 5.510761  |
| C | -1.618690 | 1.616659  | 2.764965  |
| H | -1.675946 | 2.242783  | 1.848759  |
| H | -2.226359 | 2.127368  | 3.541522  |
| H | -2.121308 | 0.646011  | 2.562543  |
| C | 0.763363  | 3.222714  | 3.761483  |
| H | 1.747386  | 3.255538  | 4.270542  |
| H | 0.026301  | 3.723789  | 4.426336  |
| H | 0.829167  | 3.806096  | 2.820825  |
| C | 3.800860  | 1.937461  | 2.701708  |
| H | 3.515290  | 2.808857  | 2.076767  |
| C | 3.467738  | -0.194088 | 0.544254  |
| H | 3.361491  | 0.606286  | -0.217948 |
| H | 2.933737  | -1.086339 | 0.155198  |
| H | 4.545024  | -0.457275 | 0.607496  |
| C | 3.307716  | -0.956108 | 3.529159  |
| H | 3.038525  | -0.638870 | 4.558276  |
| H | 4.405389  | -1.131543 | 3.511350  |
| H | 2.808269  | -1.928655 | 3.339896  |
| C | 2.505210  | -4.026683 | 0.849806  |
| H | 2.976731  | -4.423355 | -0.074655 |
| H | 2.529150  | -4.839236 | 1.608195  |
| H | 3.141948  | -3.197098 | 1.219088  |
| C | -0.260566 | -5.041995 | 0.053870  |
| H | -1.250338 | -4.798721 | -0.382156 |
| H | -0.428863 | -5.658213 | 0.963975  |
| H | 0.286030  | -5.670953 | -0.677192 |
| C | -0.036375 | -2.829301 | 2.155038  |
| H | 0.438248  | -1.896144 | 2.535814  |
| H | 0.117089  | -3.592658 | 2.947996  |
| H | -1.135396 | -2.665784 | 2.089611  |
| C | 2.808868  | -1.662676 | -2.709796 |
| H | 2.862210  | -0.576990 | -2.488379 |
| H | 3.064492  | -1.807159 | -3.782074 |
| H | 3.587228  | -2.173723 | -2.105093 |
| C | -0.162129 | -1.399980 | -3.459062 |
| H | -1.170543 | -1.859140 | -3.403260 |
| H | 0.167441  | -1.433657 | -4.519756 |
| H | -0.251738 | -0.330097 | -3.174134 |
| C | 1.059696  | -4.146184 | -2.958579 |

|   |           |           |           |
|---|-----------|-----------|-----------|
| H | 1.780234  | -4.789437 | -2.411179 |
| H | 1.360950  | -4.156116 | -4.028925 |
| H | 0.056560  | -4.614629 | -2.888883 |
| C | -3.891219 | -3.088174 | 5.288829  |
| H | -4.710917 | -2.826690 | 5.990148  |
| H | -3.853467 | -4.192499 | 5.201711  |
| H | -2.942337 | -2.760132 | 5.767098  |
| H | 4.886203  | 1.750083  | 2.549511  |
| H | 3.660654  | 2.224804  | 3.764047  |
| H | -0.558168 | 0.992511  | 5.754826  |
| O | 0.217949  | 3.476956  | 0.307590  |
| C | 1.150867  | 3.419278  | -0.469073 |
| O | 1.135531  | 4.064224  | -1.655326 |
| H | 2.116280  | 2.888102  | -0.264439 |
| C | 2.245883  | 3.864597  | -2.546424 |
| C | 2.861469  | 5.223621  | -2.889618 |
| H | 3.006096  | 3.197748  | -2.082523 |
| H | 1.859116  | 3.362429  | -3.457340 |
| O | 3.976197  | 5.037729  | -3.754736 |
| H | 2.093122  | 5.881787  | -3.349975 |
| H | 3.225078  | 5.711287  | -1.959243 |
| B | 3.859171  | 5.245409  | -5.101257 |
| O | 2.676951  | 5.584052  | -5.741918 |
| C | 3.042637  | 5.963659  | -7.106418 |
| C | 4.428132  | 5.203080  | -7.304319 |
| O | 4.945874  | 5.135398  | -5.942645 |
| C | 3.188793  | 7.494315  | -7.119812 |
| C | 1.927484  | 5.527728  | -8.058167 |
| C | 5.446857  | 5.939820  | -8.176951 |
| C | 4.253379  | 3.755488  | -7.794039 |
| H | 3.391310  | 7.880671  | -8.139136 |
| H | 2.244583  | 7.949086  | -6.758116 |
| H | 4.007608  | 7.828476  | -6.450736 |
| H | 2.212269  | 5.724217  | -9.112508 |
| H | 1.692800  | 4.451961  | -7.951056 |
| H | 1.002747  | 6.100768  | -7.843514 |
| H | 6.380823  | 5.345791  | -8.242180 |
| H | 5.059132  | 6.080668  | -9.207083 |
| H | 5.706101  | 6.929871  | -7.756671 |
| H | 5.221617  | 3.225012  | -7.695545 |
| H | 3.504357  | 3.209923  | -7.185041 |
| H | 3.939319  | 3.713374  | -8.856581 |

E(solv)= -3968.306619 A.U  
Thermal correction= 1.048687

G

|    |           |          |           |
|----|-----------|----------|-----------|
| Th | 2.032524  | 4.217885 | 6.620002  |
| Si | 0.574695  | 1.146670 | 6.235947  |
| Si | -1.503284 | 3.459983 | 5.962710  |
| Si | 2.577235  | 3.442091 | 10.056330 |
| Si | 5.161246  | 3.660039 | 8.423678  |
| N  | 3.060463  | 4.765609 | 4.709624  |
| N  | 4.128739  | 6.536914 | 3.505104  |
| N  | 3.716991  | 4.494028 | 2.428508  |
| N  | 0.137187  | 2.852668 | 6.241085  |
| N  | 3.390724  | 3.699470 | 8.502311  |
| C  | 3.594292  | 5.232268 | 3.624206  |
| C  | 3.864799  | 7.359674 | 2.302823  |
| H  | 3.882375  | 8.416173 | 2.634500  |
| H  | 2.833561  | 7.156657 | 1.938816  |
| C  | 4.859271  | 7.185067 | 1.146465  |
| H  | 5.888774  | 7.372829 | 1.524590  |

|   |           |           |           |
|---|-----------|-----------|-----------|
| H | 4.656866  | 7.972408  | 0.387209  |
| C | 4.777669  | 5.799728  | 0.503829  |
| H | 3.825709  | 5.689372  | -0.061536 |
| H | 5.596452  | 5.675270  | -0.238770 |
| C | 4.882106  | 4.661876  | 1.530789  |
| H | 4.999937  | 3.704941  | 0.987035  |
| H | 5.796928  | 4.800679  | 2.146421  |
| C | 4.556662  | 7.257128  | 4.681586  |
| C | 3.674205  | 8.158654  | 5.332071  |
| C | 4.161894  | 8.924065  | 6.412754  |
| H | 3.468787  | 9.615883  | 6.919094  |
| C | 5.491514  | 8.826099  | 6.861844  |
| C | 6.339375  | 7.910327  | 6.206139  |
| H | 7.384580  | 7.807799  | 6.544186  |
| C | 5.901657  | 7.123515  | 5.123558  |
| C | 2.241986  | 8.334186  | 4.882740  |
| H | 2.156276  | 9.084831  | 4.065728  |
| H | 1.621263  | 8.682529  | 5.729973  |
| H | 1.820234  | 7.381286  | 4.507254  |
| C | 6.009831  | 9.687844  | 7.991837  |
| H | 6.557162  | 10.572754 | 7.597189  |
| H | 6.722675  | 9.128412  | 8.632461  |
| H | 5.193030  | 10.069028 | 8.637047  |
| C | 6.872124  | 6.185589  | 4.441640  |
| H | 6.482498  | 5.148349  | 4.391652  |
| H | 7.837838  | 6.156568  | 4.983842  |
| H | 7.082612  | 6.502676  | 3.397933  |
| C | 2.879584  | 3.349829  | 2.165992  |
| C | 3.406154  | 2.036223  | 2.299293  |
| C | 2.631007  | 0.945815  | 1.854777  |
| H | 3.050492  | -0.071042 | 1.944173  |
| C | 1.345031  | 1.113101  | 1.305657  |
| C | 0.825608  | 2.421553  | 1.243504  |
| H | -0.185243 | 2.580147  | 0.830719  |
| C | 1.566840  | 3.545512  | 1.658972  |
| C | 4.778068  | 1.791953  | 2.888124  |
| H | 5.580712  | 1.836923  | 2.118813  |
| H | 4.834960  | 0.785731  | 3.349359  |
| H | 5.024419  | 2.544405  | 3.662871  |
| C | 0.976390  | 4.929832  | 1.526103  |
| H | 0.951217  | 5.458229  | 2.502043  |
| H | -0.059788 | 4.884319  | 1.137411  |
| H | 1.570136  | 5.561890  | 0.832415  |
| C | -0.064449 | 0.199020  | 7.756667  |
| H | 0.264097  | 0.667965  | 8.707058  |
| H | -1.175325 | 0.176450  | 7.763872  |
| C | 2.492294  | 1.127608  | 6.244486  |
| H | 2.902179  | 1.641585  | 5.343175  |
| H | 2.858610  | 0.080958  | 6.192637  |
| H | 2.959135  | 1.564885  | 7.157376  |
| C | 0.055704  | 0.171870  | 4.692463  |
| H | -1.031523 | -0.042830 | 4.676258  |
| H | 0.591690  | -0.801817 | 4.667956  |
| H | 0.318284  | 0.731989  | 3.772242  |
| C | -1.426358 | 4.931829  | 4.757134  |
| H | -0.729428 | 5.723308  | 5.104837  |
| C | -2.329342 | 4.017699  | 7.583314  |
| H | -1.734332 | 4.795805  | 8.103505  |
| H | -2.442412 | 3.163241  | 8.284096  |
| H | -3.342463 | 4.432684  | 7.391759  |
| C | -2.693517 | 2.193591  | 5.179078  |
| H | -2.367842 | 1.874028  | 4.167864  |
| H | -3.695189 | 2.665271  | 5.076165  |
| H | -2.823174 | 1.284954  | 5.804279  |



|   |           |           |           |
|---|-----------|-----------|-----------|
| C | 5.973735  | 2.335660  | 9.529341  |
| H | 5.819347  | 2.522290  | 10.612559 |
| H | 7.071076  | 2.340098  | 9.349557  |
| H | 5.600548  | 1.315430  | 9.300925  |
| C | 5.919816  | 5.336762  | 8.898586  |
| H | 5.580794  | 6.138115  | 8.209265  |
| H | 7.030158  | 5.300415  | 8.855493  |
| H | 5.629673  | 5.629754  | 9.928863  |
| C | 5.686779  | 3.241567  | 6.640495  |
| H | 5.464155  | 2.181031  | 6.399789  |
| H | 6.780670  | 3.391822  | 6.518939  |
| H | 5.176809  | 3.875527  | 5.882430  |
| C | 2.674603  | 1.638838  | 10.665791 |
| H | 2.306472  | 0.927769  | 9.896766  |
| H | 2.044649  | 1.508415  | 11.572588 |
| H | 3.708459  | 1.339440  | 10.931467 |
| C | 0.728198  | 3.839908  | 9.834460  |
| H | 0.553269  | 4.920539  | 9.656443  |
| H | 0.177112  | 3.561000  | 10.757535 |
| H | 0.252168  | 3.276454  | 9.001524  |
| C | 3.237110  | 4.557689  | 11.449393 |
| H | 4.294542  | 4.332509  | 11.702560 |
| H | 2.638395  | 4.410050  | 12.374268 |
| H | 3.174476  | 5.631754  | 11.176250 |
| C | 0.535880  | -0.074248 | 0.832675  |
| H | -0.216570 | 0.220571  | 0.073510  |
| H | 1.182302  | -0.859373 | 0.389762  |
| H | -0.015117 | -0.544222 | 1.677202  |
| H | -2.425666 | 5.398308  | 4.622971  |
| H | -1.075581 | 4.585872  | 3.762379  |
| H | 0.289205  | -0.854786 | 7.754268  |
| O | 0.936547  | 5.994088  | 7.212734  |
| C | 0.114471  | 7.054807  | 7.569913  |
| O | 0.813152  | 8.201598  | 8.007071  |
| H | -0.484962 | 7.398706  | 6.695300  |
| H | -0.586497 | 6.724082  | 8.382776  |
| C | 1.437064  | 8.068259  | 9.277680  |
| C | 1.676440  | 9.471828  | 9.831145  |
| H | 0.776199  | 7.508811  | 9.984065  |
| H | 2.398908  | 7.509298  | 9.204192  |
| O | 2.169169  | 9.356935  | 11.164485 |
| H | 2.383704  | 10.035621 | 9.185113  |
| H | 0.710571  | 10.025459 | 9.836690  |
| B | 3.119996  | 10.203793 | 11.652266 |
| O | 3.805347  | 11.144504 | 10.895243 |
| C | 4.536760  | 11.985081 | 11.840269 |
| C | 4.662537  | 11.030567 | 13.110471 |
| O | 3.484441  | 10.184401 | 12.983872 |
| C | 3.663807  | 13.223736 | 12.102447 |
| C | 5.868421  | 12.398071 | 11.210637 |
| C | 4.604701  | 11.747223 | 14.461919 |
| C | 5.891829  | 10.108164 | 13.048118 |
| H | 6.481294  | 12.977852 | 11.931554 |
| H | 6.454649  | 11.521689 | 10.875628 |
| H | 5.683580  | 13.042265 | 10.327054 |
| H | 5.794531  | 9.329941  | 13.831445 |
| H | 5.962126  | 9.595171  | 12.067688 |
| H | 6.836096  | 10.662564 | 13.223060 |
| H | 4.675549  | 11.003144 | 15.280998 |
| H | 5.449464  | 12.458347 | 14.572361 |
| H | 3.655375  | 12.300714 | 14.591557 |
| H | 4.175818  | 13.961373 | 12.752961 |
| H | 3.435702  | 13.714091 | 11.134550 |
| H | 2.701876  | 12.945290 | 12.578698 |

E(solv)= -3968.389071 A.U  
Thermal correction= 1.059339

TS-H

|    |           |           |           |
|----|-----------|-----------|-----------|
| Th | 0.548314  | -0.984428 | 0.229009  |
| N  | -1.066000 | -2.488181 | -0.101858 |
| C  | -2.036483 | -3.258216 | -0.483640 |
| N  | -2.583789 | -3.239934 | -1.793714 |
| C  | -4.046470 | -3.326224 | -1.999163 |
| C  | -4.624050 | -4.743574 | -2.115825 |
| C  | -4.565881 | -5.508563 | -0.795169 |
| C  | -3.159165 | -5.507317 | -0.181668 |
| N  | -2.675850 | -4.208958 | 0.343833  |
| C  | -2.627218 | -4.123612 | 1.783558  |
| C  | -3.549392 | -3.285584 | 2.469389  |
| C  | -3.615000 | -3.361558 | 3.873363  |
| C  | -2.790555 | -4.224120 | 4.622846  |
| C  | -1.863494 | -5.014941 | 3.921137  |
| C  | -1.763891 | -4.984394 | 2.514311  |
| C  | -0.773625 | -5.894352 | 1.820852  |
| C  | -4.456235 | -2.334520 | 1.725072  |
| C  | -2.873332 | -4.259640 | 6.132590  |
| H  | -5.065297 | -2.862541 | 0.962062  |
| H  | -5.152963 | -1.829202 | 2.422743  |
| H  | -3.883472 | -1.546975 | 1.189295  |
| H  | -0.438845 | -5.473385 | 0.853034  |
| H  | 0.119013  | -6.061518 | 2.455329  |
| H  | -1.209344 | -6.896508 | 1.610330  |
| H  | -1.192543 | -5.687276 | 4.483048  |
| H  | -4.342801 | -2.720702 | 4.399787  |
| H  | -3.922482 | -4.183374 | 6.486178  |
| H  | -2.317978 | -3.407611 | 6.584267  |
| H  | -2.437439 | -5.191047 | 6.546705  |
| C  | -1.803008 | -2.862012 | -2.944139 |
| C  | -0.847764 | -3.776564 | -3.473544 |
| C  | -0.225796 | -3.483871 | -4.702870 |
| C  | -0.510401 | -2.312883 | -5.431126 |
| C  | -1.423850 | -1.404943 | -4.866339 |
| C  | -2.068168 | -1.644369 | -3.634377 |
| C  | -3.027182 | -0.605226 | -3.101335 |
| H  | -2.736975 | 0.400743  | -3.463676 |
| H  | -3.051416 | -0.573733 | -1.995089 |
| H  | -4.069073 | -0.776246 | -3.454758 |
| H  | -1.645652 | -0.463560 | -5.398158 |
| C  | 0.175711  | -2.018577 | -6.746101 |
| H  | -0.496057 | -1.483182 | -7.448133 |
| H  | 1.068754  | -1.372224 | -6.595635 |
| H  | 0.524096  | -2.946621 | -7.242922 |
| H  | 0.495634  | -4.210623 | -5.112456 |
| C  | -0.515901 | -5.066883 | -2.763661 |
| H  | 0.256844  | -5.636901 | -3.315645 |
| H  | -0.134064 | -4.878726 | -1.738067 |
| H  | -1.409287 | -5.718928 | -2.665571 |
| N  | 1.189626  | 0.086908  | 2.244030  |
| Si | 2.375924  | 1.392664  | 2.015513  |
| Si | 0.503765  | -0.114897 | 3.869302  |
| C  | 1.601128  | 3.129169  | 1.992438  |
| C  | 3.779901  | 1.396181  | 3.306480  |
| C  | 3.226409  | 1.133024  | 0.333301  |
| C  | 1.702721  | -0.957064 | 5.093802  |
| C  | -0.033569 | 1.529832  | 4.667336  |
| C  | -1.037591 | -1.214271 | 3.792481  |

|    |           |           |           |
|----|-----------|-----------|-----------|
| H  | -1.881723 | -0.717235 | 3.274045  |
| H  | -0.863710 | -2.189501 | 3.291336  |
| H  | -1.374505 | -1.443158 | 4.825417  |
| H  | -0.583488 | 1.326460  | 5.611937  |
| H  | 0.828013  | 2.182419  | 4.919679  |
| H  | -0.705330 | 2.096345  | 3.989673  |
| H  | 1.981245  | -1.980676 | 4.767716  |
| H  | 2.639782  | -0.381996 | 5.234297  |
| H  | 1.212680  | -1.047808 | 6.088048  |
| H  | 1.324194  | 3.477354  | 3.008282  |
| H  | 2.320869  | 3.862681  | 1.568382  |
| H  | 0.681543  | 3.136650  | 1.372336  |
| H  | 3.425717  | 1.647046  | 4.328217  |
| H  | 4.298883  | 0.416000  | 3.354369  |
| H  | 4.531546  | 2.164810  | 3.022543  |
| H  | 3.973438  | 1.944723  | 0.198936  |
| H  | 3.764656  | 0.166734  | 0.277652  |
| H  | 2.539555  | 1.226840  | -0.536473 |
| N  | 2.397803  | -2.149189 | -0.651276 |
| Si | 3.016168  | -3.368352 | 0.467052  |
| Si | 3.096131  | -1.884659 | -2.256937 |
| C  | 1.951792  | -0.696976 | -3.198420 |
| C  | 3.273160  | -3.482617 | -3.279003 |
| C  | 4.833846  | -1.102884 | -2.221518 |
| C  | 4.774175  | -3.013288 | 1.102379  |
| C  | 3.001206  | -5.148116 | -0.208289 |
| C  | 1.853245  | -3.339062 | 1.980246  |
| H  | 4.105900  | -4.118484 | -2.912468 |
| H  | 3.496178  | -3.225401 | -4.337269 |
| H  | 2.344605  | -4.087171 | -3.262154 |
| H  | 2.361862  | -0.510610 | -4.214101 |
| H  | 1.865581  | 0.293307  | -2.701866 |
| H  | 0.931383  | -1.114668 | -3.334497 |
| H  | 5.564334  | -1.739589 | -1.679950 |
| H  | 5.210324  | -0.976950 | -3.260368 |
| H  | 4.832358  | -0.104327 | -1.739519 |
| H  | 5.532002  | -3.099534 | 0.295624  |
| H  | 5.053277  | -3.737057 | 1.898679  |
| H  | 4.849373  | -1.991677 | 1.529953  |
| H  | 3.757750  | -5.301711 | -1.004339 |
| H  | 3.230479  | -5.861763 | 0.612733  |
| H  | 2.010238  | -5.417765 | -0.628513 |
| H  | 2.126997  | -4.160055 | 2.675539  |
| H  | 0.783337  | -3.505944 | 1.716713  |
| H  | 1.940288  | -2.394500 | 2.556986  |
| H  | -4.271087 | -2.784002 | -2.935631 |
| H  | -4.558446 | -2.774836 | -1.181448 |
| H  | -4.067478 | -5.294481 | -2.906842 |
| H  | -5.675567 | -4.665305 | -2.470392 |
| H  | -4.877319 | -6.565529 | -0.947377 |
| H  | -5.281935 | -5.074946 | -0.061988 |
| H  | -2.430305 | -5.894858 | -0.924930 |
| H  | -3.149238 | -6.210932 | 0.672032  |
| O  | -0.427398 | 0.812254  | -0.828629 |
| C  | -0.333127 | 1.827621  | -1.749382 |
| B  | -1.987483 | 1.035528  | 0.577480  |
| H  | -1.495773 | 0.092600  | 1.182346  |
| O  | -3.243796 | 0.830664  | 0.004350  |
| C  | -3.959406 | 2.099784  | -0.040657 |
| C  | -3.100974 | 3.023503  | 0.945379  |
| O  | -1.810263 | 2.354933  | 0.989056  |
| C  | -5.398594 | 1.840026  | 0.425617  |
| C  | -2.894095 | 4.462034  | 0.458981  |
| C  | -3.992011 | 2.602429  | -1.493172 |

|   |           |          |           |
|---|-----------|----------|-----------|
| C | -3.642224 | 3.042912 | 2.386804  |
| H | -5.977912 | 2.784885 | 0.479425  |
| H | -5.907559 | 1.170915 | -0.297613 |
| H | -5.428751 | 1.350962 | 1.417117  |
| H | -2.393514 | 4.498932 | -0.527336 |
| H | -2.256585 | 5.009631 | 1.182076  |
| H | -3.861183 | 5.000332 | 0.380696  |
| H | -2.976509 | 2.785157 | -1.892518 |
| H | -4.575467 | 3.541072 | -1.583010 |
| H | -2.907272 | 3.557179 | 3.038005  |
| H | -4.607807 | 3.582950 | 2.461280  |
| H | -3.781057 | 2.016887 | 2.781697  |
| H | -4.476181 | 1.837853 | -2.132618 |
| H | -0.629507 | 1.478561 | -2.774841 |
| H | -0.997396 | 2.675161 | -1.445237 |
| O | 1.023067  | 2.290598 | -1.811080 |
| C | 1.275326  | 3.244690 | -2.833669 |
| H | 2.352308  | 3.161155 | -3.094119 |
| H | 0.688288  | 3.015040 | -3.756234 |
| C | 0.975860  | 4.686038 | -2.389552 |
| O | 1.153523  | 5.573500 | -3.494162 |
| H | -0.080567 | 4.776725 | -2.057627 |
| H | 1.629855  | 4.962028 | -1.535110 |
| B | 2.310054  | 6.285521 | -3.636876 |
| O | 3.340668  | 6.299780 | -2.710612 |
| C | 4.457775  | 6.998202 | -3.338637 |
| C | 3.725215  | 7.870393 | -4.453595 |
| O | 2.540048  | 7.074822 | -4.746777 |
| C | 5.383573  | 5.921386 | -3.929454 |
| C | 5.195687  | 7.806140 | -2.268980 |
| C | 4.520327  | 8.058882 | -5.747902 |
| C | 3.236183  | 9.230127 | -3.925835 |
| H | 6.306814  | 6.358422 | -4.360889 |
| H | 5.676777  | 5.218278 | -3.123929 |
| H | 4.870080  | 5.338622 | -4.720962 |
| H | 6.006034  | 8.413697 | -2.722335 |
| H | 4.511179  | 8.480735 | -1.720972 |
| H | 5.656891  | 7.118679 | -1.531105 |
| H | 2.553124  | 9.679675 | -4.674301 |
| H | 2.672407  | 9.115230 | -2.977867 |
| H | 4.074942  | 9.934214 | -3.752266 |
| H | 3.929050  | 8.664172 | -6.464594 |
| H | 5.473528  | 8.593004 | -5.554132 |
| H | 4.748519  | 7.090898 | -6.232768 |

E(solv)= -4380.240576 A.U  
Thermal correction= 1.234045

H

|    |           |           |           |
|----|-----------|-----------|-----------|
| Th | -0.786201 | -0.209719 | -0.838943 |
| N  | -2.470315 | 0.722936  | 0.254227  |
| C  | -3.321290 | 1.337927  | 1.019706  |
| N  | -2.979740 | 2.442533  | 1.838216  |
| C  | -3.537117 | 2.569915  | 3.203497  |
| C  | -4.892242 | 3.281588  | 3.314781  |
| C  | -6.035886 | 2.452620  | 2.735592  |
| C  | -5.750206 | 1.995988  | 1.299263  |
| N  | -4.682061 | 0.982353  | 1.133111  |
| C  | -5.152981 | -0.338293 | 0.790017  |
| C  | -5.046376 | -1.389450 | 1.742272  |
| C  | -5.686352 | -2.612920 | 1.468931  |
| C  | -6.409228 | -2.839183 | 0.280442  |
| C  | -6.462416 | -1.796030 | -0.660819 |

|    |           |           |           |
|----|-----------|-----------|-----------|
| C  | -5.849249 | -0.546270 | -0.431237 |
| C  | -5.982770 | 0.546841  | -1.469253 |
| C  | -4.275313 | -1.215020 | 3.028925  |
| C  | -7.063979 | -4.176149 | 0.013817  |
| H  | -4.663900 | -0.364458 | 3.627224  |
| H  | -4.347847 | -2.126157 | 3.654660  |
| H  | -3.197133 | -1.014470 | 2.845506  |
| H  | -5.128567 | 1.250681  | -1.435627 |
| H  | -6.039888 | 0.116677  | -2.488661 |
| H  | -6.908597 | 1.146772  | -1.323242 |
| H  | -7.005103 | -1.951445 | -1.609141 |
| H  | -5.615712 | -3.419750 | 2.218299  |
| H  | -7.551167 | -4.581060 | 0.925113  |
| H  | -6.314756 | -4.931044 | -0.313133 |
| H  | -7.830511 | -4.107095 | -0.783980 |
| C  | -1.913272 | 3.350764  | 1.498159  |
| C  | -2.096940 | 4.270148  | 0.423536  |
| C  | -1.133714 | 5.273045  | 0.204188  |
| C  | 0.015183  | 5.403067  | 1.008283  |
| C  | 0.191519  | 4.464082  | 2.038954  |
| C  | -0.738352 | 3.433956  | 2.301231  |
| C  | -0.448638 | 2.476875  | 3.435048  |
| H  | 0.643455  | 2.423215  | 3.617169  |
| H  | -0.807067 | 1.446546  | 3.239855  |
| H  | -0.901739 | 2.814553  | 4.394122  |
| H  | 1.092187  | 4.526239  | 2.673888  |
| C  | 1.036620  | 6.486052  | 0.742902  |
| H  | 1.634450  | 6.716966  | 1.647673  |
| H  | 1.750968  | 6.177612  | -0.052415 |
| H  | 0.556646  | 7.425162  | 0.398308  |
| H  | -1.300856 | 5.989766  | -0.617223 |
| C  | -3.318861 | 4.213604  | -0.460825 |
| H  | -3.297925 | 5.020363  | -1.219323 |
| H  | -3.387777 | 3.242494  | -0.995305 |
| H  | -4.252735 | 4.329642  | 0.128073  |
| N  | -0.399211 | -2.417639 | -1.555183 |
| Si | 1.254033  | -2.703768 | -2.150817 |
| Si | -1.463524 | -3.831309 | -1.381480 |
| C  | 2.385587  | -3.563287 | -0.891258 |
| C  | 1.306506  | -3.685619 | -3.783275 |
| C  | 2.037587  | -1.009381 | -2.527342 |
| C  | -2.226504 | -4.397932 | -3.037782 |
| C  | -0.592316 | -5.360494 | -0.654878 |
| C  | -2.893885 | -3.386942 | -0.224187 |
| H  | -2.532280 | -3.132634 | 0.792984  |
| H  | -3.501116 | -2.532216 | -0.589931 |
| H  | -3.585386 | -4.249922 | -0.126989 |
| H  | -1.344834 | -6.157054 | -0.467146 |
| H  | 0.169055  | -5.783213 | -1.343364 |
| H  | -0.092986 | -5.126306 | 0.307220  |
| H  | -2.868430 | -3.619314 | -3.498889 |
| H  | -1.452286 | -4.679094 | -3.780630 |
| H  | -2.864533 | -5.292174 | -2.864274 |
| H  | 2.176606  | -4.648825 | -0.805958 |
| H  | 3.447595  | -3.449232 | -1.200090 |
| H  | 2.259281  | -3.112819 | 0.115811  |
| H  | 0.946710  | -4.728791 | -3.661757 |
| H  | 0.695298  | -3.202954 | -4.574365 |
| H  | 2.355036  | -3.740523 | -4.148747 |
| H  | 3.056632  | -1.189856 | -2.932166 |
| H  | 1.471057  | -0.439099 | -3.289404 |
| H  | 2.196408  | -0.375492 | -1.626609 |
| N  | -0.682826 | 1.222754  | -2.708693 |
| Si | -1.907877 | 0.808659  | -3.910098 |

|    |           |           |           |
|----|-----------|-----------|-----------|
| Si | 0.432490  | 2.582191  | -2.899252 |
| C  | 1.361929  | 2.785881  | -1.254145 |
| C  | -0.438768 | 4.224731  | -3.310814 |
| C  | 1.728607  | 2.334854  | -4.274162 |
| C  | -1.193292 | 0.161920  | -5.549383 |
| C  | -3.127774 | 2.209477  | -4.321741 |
| C  | -2.924381 | -0.608900 | -3.133323 |
| H  | -0.786649 | 4.252074  | -4.364573 |
| H  | 0.270303  | 5.070133  | -3.176075 |
| H  | -1.313696 | 4.403017  | -2.655043 |
| H  | 2.062342  | 3.645640  | -1.318820 |
| H  | 1.978014  | 1.896236  | -1.000974 |
| H  | 0.673383  | 2.998746  | -0.408015 |
| H  | 1.252920  | 2.183756  | -5.265831 |
| H  | 2.371909  | 3.238815  | -4.350103 |
| H  | 2.390483  | 1.466622  | -4.080553 |
| H  | -0.657186 | 0.956754  | -6.109408 |
| H  | -2.004380 | -0.218789 | -6.207264 |
| H  | -0.479046 | -0.669146 | -5.373232 |
| H  | -2.648352 | 3.027812  | -4.896498 |
| H  | -3.961327 | 1.810960  | -4.940024 |
| H  | -3.564910 | 2.652961  | -3.403387 |
| H  | -3.791351 | -0.850361 | -3.782748 |
| H  | -3.355880 | -0.349124 | -2.138207 |
| H  | -2.332035 | -1.543774 | -3.043657 |
| H  | -2.800485 | 3.139874  | 3.796441  |
| H  | -3.599824 | 1.559488  | 3.660383  |
| H  | -4.826646 | 4.265600  | 2.798606  |
| H  | -5.082012 | 3.503627  | 4.388034  |
| H  | -6.978539 | 3.043032  | 2.730581  |
| H  | -6.229723 | 1.559433  | 3.370316  |
| H  | -5.514631 | 2.881387  | 0.670529  |
| H  | -6.671142 | 1.545730  | 0.883832  |
| O  | 0.755081  | -0.104892 | 1.057543  |
| C  | 1.968265  | 0.466464  | 1.456871  |
| B  | 0.119260  | -1.237389 | 1.932958  |
| H  | -0.840511 | -1.566234 | 1.159417  |
| O  | -0.410441 | -0.805449 | 3.212012  |
| C  | 0.182574  | -1.576854 | 4.274748  |
| C  | 0.846418  | -2.804963 | 3.497545  |
| O  | 1.103155  | -2.255732 | 2.194949  |
| C  | -0.921144 | -1.978003 | 5.266314  |
| C  | 2.171867  | -3.296976 | 4.093439  |
| C  | 1.210897  | -0.701392 | 5.020558  |
| C  | -0.116700 | -3.999834 | 3.341234  |
| H  | -0.524719 | -2.634176 | 6.069484  |
| H  | -1.338905 | -1.069475 | 5.747311  |
| H  | -1.752562 | -2.502518 | 4.759442  |
| H  | 2.938576  | -2.498600 | 4.097611  |
| H  | 2.565320  | -4.137735 | 3.486275  |
| H  | 2.035500  | -3.660961 | 5.133182  |
| H  | 2.055485  | -0.403496 | 4.367670  |
| H  | 1.631650  | -1.217643 | 5.907958  |
| H  | 0.337486  | -4.731940 | 2.643442  |
| H  | -0.312207 | -4.515742 | 4.303582  |
| H  | -1.087025 | -3.680808 | 2.910845  |
| H  | 0.711128  | 0.225312  | 5.369112  |
| H  | 1.840513  | 1.568153  | 1.597703  |
| H  | 2.290896  | -0.005587 | 2.411623  |
| O  | 2.925288  | 0.233838  | 0.431870  |
| C  | 4.226209  | 0.730517  | 0.733978  |
| H  | 4.703951  | 0.996506  | -0.232856 |
| H  | 4.173890  | 1.660820  | 1.348703  |
| C  | 5.090416  | -0.310922 | 1.462600  |

|   |           |           |           |
|---|-----------|-----------|-----------|
| O | 6.319616  | 0.288692  | 1.872654  |
| H | 4.571230  | -0.668122 | 2.377016  |
| H | 5.263772  | -1.187216 | 0.802654  |
| B | 7.439122  | 0.179118  | 1.097801  |
| O | 7.516745  | -0.574218 | -0.062626 |
| C | 8.796542  | -0.251337 | -0.686131 |
| C | 9.644974  | 0.293661  | 0.548474  |
| O | 8.612905  | 0.826942  | 1.428449  |
| C | 8.517589  | 0.826748  | -1.747058 |
| C | 9.354585  | -1.514709 | -1.344777 |
| C | 10.626153 | 1.418141  | 0.208178  |
| C | 10.363790 | -0.824486 | 1.322748  |
| H | 9.425503  | 1.079737  | -2.331141 |
| H | 7.748223  | 0.448494  | -2.450103 |
| H | 8.129884  | 1.756796  | -1.283919 |
| H | 10.365080 | -1.328022 | -1.763488 |
| H | 9.417472  | -2.355488 | -0.628581 |
| H | 8.692623  | -1.827582 | -2.177657 |
| H | 10.742884 | -0.410803 | 2.278772  |
| H | 9.672081  | -1.656900 | 1.564199  |
| H | 11.223379 | -1.235610 | 0.755782  |
| H | 11.158053 | 1.739879  | 1.126409  |
| H | 11.385703 | 1.074394  | -0.524156 |
| H | 10.107362 | 2.302528  | -0.207615 |

E(solv)= -4380.251466 A.U  
 Thermal correction= 1.23584

BpinOROCH<sub>2</sub>OBpin

|   |           |           |           |
|---|-----------|-----------|-----------|
| C | 0.912095  | -1.013221 | -0.930311 |
| O | 1.209102  | -1.833002 | -2.096851 |
| B | 0.238674  | -1.547227 | -3.037874 |
| O | -0.558046 | -0.460832 | -2.713949 |
| C | 0.060567  | 0.179173  | -1.557570 |
| O | 0.107300  | -2.290485 | -4.174132 |
| C | 0.935083  | 1.325499  | -2.092248 |
| C | -1.043949 | 0.729083  | -0.653017 |
| C | 2.231948  | -0.590852 | -0.280679 |
| C | 0.096374  | -1.885134 | 0.039668  |
| H | 1.387809  | 1.918587  | -1.272035 |
| H | 1.750990  | 0.941706  | -2.737686 |
| H | 0.305416  | 2.003092  | -2.703529 |
| H | -0.617313 | 1.157820  | 0.277301  |
| H | -1.593363 | 1.535806  | -1.179655 |
| H | -1.775333 | -0.054502 | -0.379194 |
| H | -0.106879 | -1.362653 | 0.996324  |
| H | -0.872327 | -2.187483 | -0.407348 |
| H | 0.670341  | -2.807283 | 0.261063  |
| H | 2.053518  | 0.096678  | 0.571971  |
| H | 2.759544  | -1.485804 | 0.107053  |
| H | 2.903410  | -0.091938 | -1.004696 |
| C | -0.870398 | -1.962809 | -5.158785 |
| C | -0.329247 | -2.372666 | -6.524968 |
| H | -1.814513 | -2.517603 | -4.958072 |
| H | -1.111403 | -0.877614 | -5.147104 |
| O | -1.336970 | -2.082372 | -7.490699 |
| H | 0.608566  | -1.806558 | -6.750281 |
| H | -0.072621 | -3.456129 | -6.519568 |
| C | -0.987183 | -2.406166 | -8.802643 |
| O | -0.920589 | -3.813904 | -9.011008 |
| H | 0.024257  | -2.007188 | -9.057133 |
| H | -1.762677 | -1.950355 | -9.452791 |
| B | -2.010239 | -4.488473 | -9.495427 |

|   |           |           |            |
|---|-----------|-----------|------------|
| O | -3.177696 | -3.882685 | -9.927498  |
| C | -3.959731 | -4.917385 | -10.597571 |
| C | -3.378850 | -6.249360 | -9.947106  |
| O | -2.012805 | -5.863189 | -9.613501  |
| C | -3.660660 | -4.804313 | -12.101702 |
| C | -5.443622 | -4.659110 | -10.328473 |
| C | -3.329089 | -7.456916 | -10.886060 |
| C | -4.074839 | -6.625914 | -8.627954  |
| H | -2.901276 | -8.328472 | -10.350408 |
| H | -4.346686 | -7.733770 | -11.231201 |
| H | -2.694837 | -7.261775 | -11.771438 |
| H | -3.480685 | -7.413102 | -8.121967  |
| H | -4.138474 | -5.755764 | -7.943668  |
| H | -5.098960 | -7.016341 | -8.796188  |
| H | -4.276354 | -5.506006 | -12.700052 |
| H | -3.887178 | -3.771997 | -12.436688 |
| H | -2.591824 | -5.006608 | -12.316185 |
| H | -6.070421 | -5.470218 | -10.753292 |
| H | -5.653795 | -4.578596 | -9.245341  |
| H | -5.750628 | -3.705939 | -10.804858 |

E(solv)= -1166.18432 A.U

Thermal correction= 0.388798

TS-I

|    |           |           |           |
|----|-----------|-----------|-----------|
| Th | 0.300206  | 0.004855  | -0.200072 |
| Si | 0.597697  | 0.845642  | 3.397024  |
| Si | 3.186498  | 0.221978  | 1.928602  |
| Si | 2.309685  | -2.788857 | -1.835364 |
| Si | 0.209708  | -3.403906 | 0.261471  |
| N  | -1.889392 | 0.133094  | -0.738401 |
| N  | -3.389453 | -0.056405 | -2.597496 |
| N  | -4.213433 | 0.707606  | -0.538556 |
| N  | 1.429627  | 0.419693  | 1.896715  |
| N  | 1.080803  | -2.193377 | -0.696423 |
| C  | -3.073191 | 0.250645  | -1.246770 |
| C  | -4.226730 | 0.859128  | -3.403155 |
| H  | -3.888866 | 0.760441  | -4.452659 |
| H  | -4.020260 | 1.908574  | -3.098978 |
| C  | -5.738404 | 0.600525  | -3.346237 |
| H  | -5.934027 | -0.458848 | -3.625208 |
| H  | -6.233382 | 1.224959  | -4.122726 |
| C  | -6.326901 | 0.903208  | -1.968486 |
| H  | -6.321048 | 1.999480  | -1.776099 |
| H  | -7.392204 | 0.585301  | -1.927449 |
| C  | -5.570627 | 0.195442  | -0.833382 |
| H  | -6.159783 | 0.307272  | 0.095752  |
| H  | -5.511298 | -0.892288 | -1.048671 |
| C  | -2.613641 | -1.014805 | -3.346789 |
| C  | -1.610448 | -0.577155 | -4.251780 |
| C  | -0.983961 | -1.528321 | -5.083618 |
| H  | -0.208258 | -1.181385 | -5.787636 |
| C  | -1.315023 | -2.895196 | -5.043974 |
| C  | -2.284730 | -3.306611 | -4.107663 |
| H  | -2.552661 | -4.374827 | -4.043121 |
| C  | -2.941004 | -2.395163 | -3.257547 |
| C  | -1.225642 | 0.878088  | -4.361607 |
| H  | -1.842984 | 1.418947  | -5.112980 |
| H  | -0.170096 | 0.985756  | -4.671696 |
| H  | -1.343202 | 1.400285  | -3.392408 |
| C  | -0.679703 | -3.883503 | -5.997304 |
| H  | 0.337187  | -3.562626 | -6.301372 |
| H  | -1.282579 | -3.984540 | -6.927393 |



|   |           |           |           |
|---|-----------|-----------|-----------|
| H | -0.600441 | -4.895289 | -5.550148 |
| C | -3.992746 | -2.894490 | -2.293338 |
| H | -4.993841 | -2.476524 | -2.531050 |
| H | -3.761022 | -2.605815 | -1.246616 |
| H | -4.071140 | -3.998779 | -2.328964 |
| C | -4.094819 | 1.509890  | 0.650340  |
| C | -4.451100 | 0.966644  | 1.914107  |
| C | -4.504202 | 1.823162  | 3.033834  |
| H | -4.792877 | 1.396741  | 4.009864  |
| C | -4.160677 | 3.182921  | 2.955505  |
| C | -3.749075 | 3.682104  | 1.701948  |
| H | -3.455301 | 4.741197  | 1.610890  |
| C | -3.724974 | 2.880640  | 0.544719  |
| C | -4.747012 | -0.505939 | 2.095236  |
| H | -5.829565 | -0.741411 | 1.990770  |
| H | -4.442967 | -0.840947 | 3.107176  |
| H | -4.203354 | -1.119271 | 1.350000  |
| C | -3.350652 | 3.496318  | -0.783506 |
| H | -2.526253 | 2.940539  | -1.277288 |
| H | -3.026063 | 4.547031  | -0.651186 |
| H | -4.211786 | 3.490908  | -1.486007 |
| C | 0.977880  | -0.358686 | 4.829601  |
| H | 0.768319  | -1.412602 | 4.549376  |
| H | 2.039099  | -0.303046 | 5.152352  |
| C | -1.279541 | 0.801589  | 3.114996  |
| H | -1.612938 | 1.399038  | 2.239233  |
| H | -1.784993 | 1.239509  | 4.000772  |
| H | -1.678915 | -0.224072 | 2.986032  |
| C | 0.965480  | 2.599272  | 4.056348  |
| H | 2.023416  | 2.737568  | 4.356394  |
| H | 0.339018  | 2.781550  | 4.957196  |
| H | 0.721743  | 3.391081  | 3.317618  |
| C | 4.127987  | 1.503165  | 2.984532  |
| H | 3.886546  | 2.546592  | 2.693345  |
| C | 3.877924  | 0.468663  | 0.163478  |
| H | 3.828131  | 1.537520  | -0.129533 |
| H | 3.371584  | -0.135442 | -0.619827 |
| H | 4.946836  | 0.166823  | 0.140740  |
| C | 3.738019  | -1.492579 | 2.537169  |
| H | 3.405633  | -1.682346 | 3.578831  |
| H | 4.845210  | -1.586816 | 2.511758  |
| H | 3.314306  | -2.289587 | 1.893965  |
| C | 1.304078  | -4.552094 | 1.317027  |
| H | 1.929500  | -5.218960 | 0.687540  |
| H | 0.656160  | -5.203191 | 1.943820  |
| H | 1.977924  | -3.988335 | 1.993897  |
| C | -0.949924 | -4.542721 | -0.731170 |
| H | -1.483118 | -3.980436 | -1.523028 |
| H | -1.704399 | -4.996196 | -0.051874 |
| H | -0.402323 | -5.372737 | -1.221359 |
| C | -0.902935 | -2.456641 | 1.493713  |
| H | -0.304101 | -1.893064 | 2.239437  |
| H | -1.513336 | -3.190193 | 2.061720  |
| H | -1.630964 | -1.761708 | 1.012493  |
| C | 3.944622  | -3.256628 | -0.967878 |
| H | 4.416200  | -2.383060 | -0.473503 |
| H | 4.668646  | -3.651986 | -1.713673 |
| H | 3.799396  | -4.038690 | -0.194699 |
| C | 2.775340  | -1.538543 | -3.194930 |
| H | 1.882068  | -1.189112 | -3.750326 |
| H | 3.466599  | -2.038654 | -3.908255 |
| H | 3.305588  | -0.646832 | -2.800584 |
| C | 1.750156  | -4.347978 | -2.784033 |
| H | 1.667217  | -5.244159 | -2.134672 |

|   |           |           |           |
|---|-----------|-----------|-----------|
| H | 2.498855  | -4.582026 | -3.571842 |
| H | 0.769967  | -4.187194 | -3.278413 |
| C | -4.194878 | 4.079103  | 4.173911  |
| H | -4.781384 | 5.003270  | 3.984449  |
| H | -4.645456 | 3.565557  | 5.046708  |
| H | -3.172104 | 4.401487  | 4.467191  |
| H | 5.220346  | 1.355155  | 2.836571  |
| H | 3.927561  | 1.395846  | 4.070858  |
| H | 0.351418  | -0.112997 | 5.714778  |
| O | 0.886799  | 2.297091  | -0.648369 |
| C | 2.084642  | 2.209045  | -2.334359 |
| O | 1.399614  | 2.560175  | -3.430808 |
| H | 2.522651  | 3.054786  | -1.770205 |
| H | 2.754062  | 1.355247  | -2.489653 |
| C | 1.230225  | 3.384006  | 0.177166  |
| B | 0.996177  | 3.868694  | -3.682671 |
| O | 1.379655  | 4.957531  | -2.938786 |
| C | 1.016475  | 6.138484  | -3.735503 |
| C | -0.137372 | 5.567371  | -4.672766 |
| O | 0.214419  | 4.147085  | -4.772480 |
| C | 2.278215  | 6.546198  | -4.512570 |
| C | 0.587264  | 7.258051  | -2.788021 |
| C | -0.171140 | 6.157041  | -6.083704 |
| C | -1.528775 | 5.637332  | -4.026088 |
| H | 0.235495  | 8.139186  | -3.363688 |
| H | -0.215554 | 6.943546  | -2.094555 |
| H | 1.455023  | 7.578118  | -2.176191 |
| H | 2.119263  | 7.479801  | -5.088834 |
| H | 3.104547  | 6.718932  | -3.794355 |
| H | 2.597585  | 5.751534  | -5.217162 |
| H | -0.990923 | 5.688143  | -6.664312 |
| H | -0.359492 | 7.249807  | -6.049138 |
| H | 0.774663  | 5.977580  | -6.628778 |
| H | -2.237241 | 5.037450  | -4.631477 |
| H | -1.520815 | 5.222281  | -2.998376 |
| H | -1.906020 | 6.678526  | -3.979944 |
| H | 2.070088  | 3.970561  | -0.282476 |
| C | 0.045651  | 4.339768  | 0.355682  |
| H | 1.588908  | 3.034667  | 1.171556  |
| O | 0.458009  | 5.413443  | 1.207768  |
| H | -0.280180 | 4.718716  | -0.636761 |
| H | -0.811341 | 3.801080  | 0.818214  |
| B | -0.212441 | 6.595833  | 1.259584  |
| O | -1.288625 | 6.942851  | 0.446245  |
| C | -1.823650 | 8.198881  | 0.969718  |
| C | -0.581153 | 8.787638  | 1.777641  |
| O | 0.147939  | 7.587405  | 2.152312  |
| C | -3.012200 | 7.842975  | 1.876952  |
| C | -2.295854 | 9.062706  | -0.201743 |
| C | -0.946080 | 9.552825  | 3.052872  |
| C | 0.359174  | 9.634484  | 0.902285  |
| H | -2.643316 | 10.054246 | 0.155270  |
| H | -1.493884 | 9.220445  | -0.947342 |
| H | -3.147295 | 8.569843  | -0.713856 |
| H | -3.512353 | 8.748920  | 2.274592  |
| H | -3.757878 | 7.268568  | 1.291087  |
| H | -2.690454 | 7.216059  | 2.732682  |
| H | -0.020117 | 9.901817  | 3.552977  |
| H | -1.566133 | 10.443952 | 2.822651  |
| H | -1.494498 | 8.914053  | 3.770808  |
| H | 1.296003  | 9.823019  | 1.463922  |
| H | 0.627555  | 9.101974  | -0.032679 |
| H | -0.089215 | 10.612497 | 0.633995  |
| H | 1.145219  | 0.492487  | -2.133234 |

E(solv)= -4380.157208 A.U  
Thermal correction= 1.229590

I

|    |           |          |           |
|----|-----------|----------|-----------|
| Th | 2.221012  | 4.873770 | 6.500793  |
| Si | -0.579197 | 3.604162 | 5.036567  |
| Si | -0.624246 | 6.732193 | 5.100552  |
| Si | 1.108147  | 3.557177 | 9.635202  |
| Si | 3.862647  | 2.543150 | 8.757919  |
| N  | 3.892160  | 4.836514 | 5.007469  |
| N  | 5.946868  | 5.856859 | 4.349615  |
| N  | 5.079286  | 4.071485 | 3.079681  |
| N  | 0.131175  | 5.164779 | 5.429739  |
| N  | 2.402193  | 3.485299 | 8.429202  |
| C  | 4.900419  | 4.919158 | 4.199297  |
| C  | 6.569542  | 6.525166 | 3.184233  |
| H  | 6.956275  | 7.495166 | 3.551819  |
| H  | 5.787299  | 6.756669 | 2.428024  |
| C  | 7.717715  | 5.764193 | 2.507374  |
| H  | 8.482163  | 5.505299 | 3.273275  |
| H  | 8.214467  | 6.451887 | 1.788079  |
| C  | 7.242078  | 4.502035 | 1.788533  |
| H  | 6.629108  | 4.768664 | 0.898656  |
| H  | 8.114946  | 3.928086 | 1.406485  |
| C  | 6.421013  | 3.578319 | 2.700101  |
| H  | 6.270223  | 2.615816 | 2.177107  |
| H  | 7.001252  | 3.356339 | 3.622882  |
| C  | 6.138454  | 6.512146 | 5.623057  |
| C  | 5.593300  | 7.805253 | 5.849954  |
| C  | 5.907355  | 8.471957 | 7.050242  |
| H  | 5.490194  | 9.478823 | 7.222224  |
| C  | 6.722717  | 7.890954 | 8.042480  |
| C  | 7.223272  | 6.596756 | 7.801801  |
| H  | 7.862207  | 6.117727 | 8.562811  |
| C  | 6.956738  | 5.896965 | 6.606153  |
| C  | 4.703596  | 8.478696 | 4.829304  |
| H  | 5.290032  | 9.055791 | 4.080529  |
| H  | 4.014815  | 9.195144 | 5.319105  |
| H  | 4.092863  | 7.740960 | 4.273239  |
| C  | 7.037472  | 8.640256 | 9.318472  |
| H  | 6.107351  | 8.943885 | 9.844594  |
| H  | 7.605874  | 9.571758 | 9.106914  |
| H  | 7.644464  | 8.026802 | 10.013927 |
| C  | 7.568538  | 4.533088 | 6.380498  |
| H  | 6.799169  | 3.763456 | 6.165634  |
| H  | 8.136313  | 4.202324 | 7.272260  |
| H  | 8.267417  | 4.538763 | 5.517120  |
| C  | 3.948539  | 3.436395 | 2.452304  |
| C  | 3.745592  | 2.033303 | 2.562681  |
| C  | 2.709712  | 1.432910 | 1.813423  |
| H  | 2.565906  | 0.341917 | 1.897643  |
| C  | 1.859782  | 2.172193 | 0.974413  |
| C  | 2.052760  | 3.568681 | 0.920526  |
| H  | 1.395069  | 4.179550 | 0.278726  |
| C  | 3.074982  | 4.215381 | 1.638519  |
| C  | 4.605345  | 1.154023 | 3.444139  |
| H  | 5.454323  | 0.702073 | 2.884112  |
| H  | 4.009373  | 0.311465 | 3.849140  |
| H  | 5.030798  | 1.712768 | 4.298488  |
| C  | 3.242632  | 5.710622 | 1.513013  |
| H  | 3.133129  | 6.215577 | 2.496080  |
| H  | 2.487021  | 6.138148 | 0.825317  |

|   |           |          |           |
|---|-----------|----------|-----------|
| H | 4.247663  | 5.977090 | 1.123114  |
| C | -2.114263 | 3.182469 | 6.078646  |
| H | -1.903811 | 3.226836 | 7.167131  |
| H | -2.936751 | 3.899403 | 5.869381  |
| C | 0.794135  | 2.313873 | 5.417532  |
| H | 1.691788  | 2.464031 | 4.771742  |
| H | 0.415692  | 1.299506 | 5.171863  |
| H | 1.117013  | 2.256323 | 6.484261  |
| C | -1.038605 | 3.345744 | 3.212722  |
| H | -1.913098 | 3.955959 | 2.910519  |
| H | -1.297746 | 2.278182 | 3.042746  |
| H | -0.184873 | 3.602356 | 2.552381  |
| C | 0.703466  | 7.965602 | 4.520417  |
| H | 1.517642  | 8.058895 | 5.268721  |
| C | -1.463424 | 7.453738 | 6.649100  |
| H | -0.735011 | 7.596993 | 7.473803  |
| H | -2.266064 | 6.784443 | 7.024886  |
| H | -1.922976 | 8.440844 | 6.425176  |
| C | -1.953407 | 6.677803 | 3.734741  |
| H | -1.540755 | 6.333719 | 2.763897  |
| H | -2.357207 | 7.702652 | 3.583840  |
| H | -2.811720 | 6.022996 | 3.995478  |
| C | 3.581526  | 0.937270 | 9.746268  |
| H | 3.171982  | 1.114594 | 10.762154 |
| H | 4.553494  | 0.411698 | 9.870171  |
| H | 2.892845  | 0.246274 | 9.216206  |
| C | 5.154956  | 3.584106 | 9.690307  |
| H | 5.383622  | 4.520689 | 9.137773  |
| H | 6.106935  | 3.026900 | 9.827775  |
| H | 4.785218  | 3.874705 | 10.696097 |
| C | 4.603797  | 2.001103 | 7.091101  |
| H | 3.960423  | 1.230289 | 6.616881  |
| H | 5.614135  | 1.559924 | 7.227861  |
| H | 4.697815  | 2.844047 | 6.370937  |
| C | 0.077658  | 1.954358 | 9.676697  |
| H | -0.353888 | 1.726400 | 8.679310  |
| H | -0.766056 | 2.045654 | 10.394837 |
| H | 0.687443  | 1.080228 | 9.984157  |
| C | -0.079492 | 4.982142 | 9.196780  |
| H | 0.353172  | 5.972464 | 9.447938  |
| H | -1.014813 | 4.871365 | 9.786304  |
| H | -0.387376 | 5.008168 | 8.127688  |
| C | 1.730332  | 3.897895 | 11.403544 |
| H | 2.390139  | 3.092848 | 11.788788 |
| H | 0.868249  | 3.982741 | 12.100261 |
| H | 2.295406  | 4.852427 | 11.449707 |
| C | 0.765926  | 1.509486 | 0.167657  |
| H | 0.853812  | 1.754562 | -0.912377 |
| H | 0.794242  | 0.406131 | 0.268174  |
| H | -0.239288 | 1.853235 | 0.494428  |
| H | 0.266771  | 8.975932 | 4.369139  |
| H | 1.155185  | 7.644429 | 3.557887  |
| H | -2.492757 | 2.164157 | 5.843377  |
| O | 2.315598  | 6.795913 | 7.451802  |
| C | 2.460210  | 7.959892 | 8.215205  |
| C | 3.257834  | 7.671807 | 9.494832  |
| H | 2.994268  | 8.749272 | 7.634363  |
| H | 1.459193  | 8.372475 | 8.490442  |
| O | 3.521059  | 8.881493 | 10.215293 |
| H | 2.706668  | 6.944503 | 10.128943 |
| H | 4.235985  | 7.226772 | 9.216963  |
| B | 2.679246  | 9.287526 | 11.210554 |
| O | 1.527593  | 8.613492 | 11.588008 |
| C | 1.069384  | 9.233265 | 12.827596 |

|   |           |           |           |
|---|-----------|-----------|-----------|
| C | 1.730029  | 10.679659 | 12.743151 |
| O | 2.924083  | 10.432578 | 11.944935 |
| C | 1.624207  | 8.386490  | 13.985308 |
| C | -0.460830 | 9.219685  | 12.845240 |
| C | 2.155712  | 11.273323 | 14.088520 |
| C | 0.868442  | 11.689240 | 11.965099 |
| H | -0.851443 | 9.752459  | 13.736857 |
| H | -0.885559 | 9.689155  | 11.937877 |
| H | -0.824829 | 8.173128  | 12.887231 |
| H | 1.259026  | 8.742042  | 14.970063 |
| H | 1.295897  | 7.336162  | 13.851463 |
| H | 2.732954  | 8.397642  | 13.998306 |
| H | 2.615909  | 12.269287 | 13.927595 |
| H | 1.281245  | 11.405168 | 14.758861 |
| H | 2.901767  | 10.636152 | 14.599996 |
| H | 1.478669  | 12.589938 | 11.752090 |
| H | 0.532619  | 11.270368 | 10.994901 |
| H | -0.026105 | 12.003164 | 12.540323 |

E(solv)=-3853.871102 A.U  
Thermal correction= 1.029023

TS-J

|    |           |           |           |
|----|-----------|-----------|-----------|
| Th | 0.583973  | -0.246986 | 0.816515  |
| N  | 1.988650  | 0.896048  | -0.498643 |
| C  | 2.624186  | 1.678074  | -1.315344 |
| N  | 4.030828  | 1.694551  | -1.473407 |
| C  | 4.776044  | 2.954924  | -1.694862 |
| C  | 4.895425  | 3.423895  | -3.150571 |
| C  | 3.559590  | 3.905970  | -3.711567 |
| C  | 2.443581  | 2.865946  | -3.540194 |
| N  | 1.982885  | 2.626591  | -2.154616 |
| C  | 4.849219  | 0.548414  | -1.163425 |
| C  | 5.671892  | 0.551552  | -0.003485 |
| C  | 6.595682  | -0.498122 | 0.179646  |
| C  | 6.727620  | -1.551200 | -0.743401 |
| C  | 5.874352  | -1.547141 | -1.864032 |
| C  | 4.932602  | -0.526098 | -2.091357 |
| C  | 4.042843  | -0.584368 | -3.310509 |
| C  | 7.711465  | -2.676921 | -0.514502 |
| C  | 5.601241  | 1.659715  | 1.023741  |
| H  | 4.203769  | 0.288388  | -3.978054 |
| H  | 2.967032  | -0.584655 | -3.033170 |
| H  | 4.241937  | -1.500396 | -3.900709 |
| H  | 5.942828  | -2.369882 | -2.596141 |
| H  | 8.588104  | -2.342576 | 0.076714  |
| H  | 8.081945  | -3.098019 | -1.471519 |
| H  | 7.239042  | -3.513221 | 0.047494  |
| H  | 7.233665  | -0.486545 | 1.080159  |
| H  | 6.322974  | 2.478589  | 0.806829  |
| H  | 5.849884  | 1.275426  | 2.032600  |
| H  | 4.592619  | 2.113864  | 1.065301  |
| H  | 4.320058  | 3.761688  | -1.082416 |
| H  | 5.794484  | 2.790542  | -1.296548 |
| H  | 5.649391  | 4.240593  | -3.193159 |
| H  | 5.299558  | 2.591825  | -3.769129 |
| H  | 3.656214  | 4.138510  | -4.795063 |
| H  | 3.251434  | 4.852649  | -3.213995 |
| H  | 2.759744  | 1.900377  | -3.990442 |
| H  | 1.562344  | 3.207408  | -4.112615 |
| C  | 0.708902  | 3.203307  | -1.805367 |
| C  | -0.465196 | 2.876987  | -2.540090 |
| H  | -2.558359 | 3.334386  | -2.852446 |

|    |           |           |           |
|----|-----------|-----------|-----------|
| C  | -1.655273 | 3.589798  | -2.272151 |
| C  | -1.728485 | 4.602231  | -1.300451 |
| C  | -0.557979 | 4.886449  | -0.568019 |
| C  | 0.655291  | 4.212617  | -0.800217 |
| C  | -0.483356 | 1.814904  | -3.614705 |
| C  | -3.016789 | 5.344974  | -1.025354 |
| C  | 1.883406  | 4.601271  | -0.013056 |
| H  | 1.644082  | 5.378504  | 0.738565  |
| H  | 2.677712  | 5.007888  | -0.674144 |
| H  | 2.316779  | 3.730680  | 0.521642  |
| H  | -0.188774 | 2.223409  | -4.607273 |
| H  | 0.188659  | 0.966509  | -3.385774 |
| H  | -1.504595 | 1.404566  | -3.733657 |
| H  | -0.582181 | 5.675239  | 0.202754  |
| H  | -3.766034 | 5.175145  | -1.824249 |
| H  | -2.846422 | 6.438825  | -0.940704 |
| H  | -3.472676 | 5.015457  | -0.065993 |
| N  | 0.403944  | 1.241557  | 2.663503  |
| Si | -0.969023 | 2.292971  | 3.042903  |
| Si | 1.854898  | 1.256805  | 3.676427  |
| C  | -1.929193 | 1.775614  | 4.607878  |
| C  | -0.489352 | 4.116812  | 3.308899  |
| C  | -2.184346 | 2.211614  | 1.586813  |
| C  | 1.533346  | 0.841787  | 5.505961  |
| C  | 2.816468  | 2.901737  | 3.661250  |
| C  | 3.035306  | -0.069129 | 2.979463  |
| H  | 3.303962  | 0.107020  | 1.911855  |
| H  | 2.630784  | -1.097391 | 3.079160  |
| H  | 3.993036  | -0.035289 | 3.540085  |
| H  | 0.950144  | -0.094463 | 5.626297  |
| H  | 2.498103  | 0.714337  | 6.043196  |
| H  | 0.976688  | 1.655259  | 6.016935  |
| H  | 3.793037  | 2.765340  | 4.174723  |
| H  | 2.274894  | 3.714697  | 4.186016  |
| H  | 3.021135  | 3.246080  | 2.626928  |
| H  | -3.076671 | 2.840277  | 1.791277  |
| H  | -1.730925 | 2.578398  | 0.641706  |
| H  | -2.553260 | 1.177716  | 1.424871  |
| H  | -2.303960 | 0.733351  | 4.549904  |
| H  | -1.309101 | 1.859303  | 5.523946  |
| H  | -2.809991 | 2.441455  | 4.741010  |
| H  | 0.160328  | 4.492949  | 2.493477  |
| H  | -1.406136 | 4.744959  | 3.335999  |
| H  | 0.043153  | 4.270044  | 4.270821  |
| N  | 0.868443  | -2.442721 | 1.665250  |
| Si | -0.421219 | -2.979301 | 2.752776  |
| Si | 2.145177  | -3.593023 | 1.214851  |
| C  | -1.781138 | -1.643887 | 2.738193  |
| C  | -1.264379 | -4.609010 | 2.248591  |
| C  | 0.138971  | -3.154880 | 4.564990  |
| C  | 1.511722  | -5.087985 | 0.222733  |
| C  | 3.417444  | -2.719682 | 0.116169  |
| C  | 3.094356  | -4.280340 | 2.722126  |
| H  | -2.265926 | -1.548283 | 1.745755  |
| H  | -2.574606 | -1.919714 | 3.464185  |
| H  | -1.400475 | -0.649832 | 3.058311  |
| H  | -2.195948 | -4.741679 | 2.840777  |
| H  | -1.531768 | -4.605399 | 1.171928  |
| H  | -0.622416 | -5.493508 | 2.440441  |
| H  | 0.894905  | -3.955802 | 4.696139  |
| H  | -0.728600 | -3.401971 | 5.214888  |
| H  | 0.584072  | -2.209560 | 4.939949  |
| H  | 0.976811  | -5.824079 | 0.856056  |
| H  | 0.816325  | -4.753992 | -0.574602 |

|   |            |           |           |
|---|------------|-----------|-----------|
| H | 2.368780   | -5.615622 | -0.250257 |
| H | 2.460393   | -4.933075 | 3.358573  |
| H | 3.503712   | -3.473460 | 3.365643  |
| H | 3.950720   | -4.897562 | 2.372129  |
| H | 4.200276   | -3.449799 | -0.178126 |
| H | 3.934330   | -1.875937 | 0.616524  |
| H | 2.973328   | -2.333126 | -0.823751 |
| O | -1.193670  | -0.554903 | -0.558323 |
| C | -2.385885  | -0.090544 | -1.158415 |
| H | -2.391396  | -0.374332 | -2.235212 |
| H | -2.435614  | 1.021417  | -1.122119 |
| C | -3.635422  | -0.685060 | -0.497221 |
| H | -3.504588  | -1.783845 | -0.385831 |
| H | -3.806958  | -0.261221 | 0.516012  |
| O | -4.756888  | -0.419024 | -1.346849 |
| B | -5.996889  | -0.195166 | -0.823161 |
| O | -7.082029  | 0.094338  | -1.629385 |
| C | -8.262383  | 0.029656  | -0.778195 |
| C | -7.653629  | 0.281734  | 0.672608  |
| O | -6.296028  | -0.232461 | 0.529737  |
| C | -8.347913  | -0.477818 | 1.805499  |
| C | -7.536823  | 1.774608  | 1.024216  |
| H | -8.527286  | 2.230238  | 1.226602  |
| H | -7.049927  | 2.343903  | 0.206672  |
| H | -6.912537  | 1.882022  | 1.933979  |
| C | -9.263415  | 1.088159  | -1.247900 |
| C | -8.861062  | -1.378411 | -0.940157 |
| H | -9.814983  | -1.489498 | -0.385927 |
| H | -9.058784  | -1.561763 | -2.015427 |
| H | -8.157075  | -2.158741 | -0.586370 |
| H | -9.623194  | 0.836674  | -2.266215 |
| H | -10.144427 | 1.128557  | -0.574278 |
| H | -8.804436  | 2.093977  | -1.291552 |
| H | -9.410603  | -0.171116 | 1.895043  |
| H | -8.307444  | -1.572400 | 1.649176  |
| H | -7.846341  | -0.254861 | 2.769125  |
| H | 0.833245   | -1.716055 | -1.169735 |
| B | -0.190162  | -1.957763 | -1.802234 |
| O | -0.776808  | -3.213025 | -1.672345 |
| C | -1.427702  | -3.569829 | -2.926542 |
| C | -0.824889  | -2.502739 | -3.954086 |
| O | -0.349465  | -1.434644 | -3.086237 |
| C | -2.950388  | -3.465522 | -2.744944 |
| C | -1.065526  | -5.028232 | -3.241065 |
| C | -1.841464  | -1.924254 | -4.944822 |
| C | 0.403072   | -3.024150 | -4.723724 |
| H | 0.860445   | -2.181789 | -5.281045 |
| H | 1.170936   | -3.430523 | -4.035703 |
| H | 0.131668   | -3.813874 | -5.453216 |
| H | -1.345374  | -1.171342 | -5.590371 |
| H | -2.248995  | -2.719080 | -5.603224 |
| H | -2.688368  | -1.429624 | -4.432788 |
| H | -1.474593  | -5.336539 | -4.225507 |
| H | 0.028152   | -5.192669 | -3.244411 |
| H | -1.502866  | -5.692701 | -2.468672 |
| H | -3.488009  | -3.849933 | -3.635753 |
| H | -3.249957  | -4.082245 | -1.873486 |
| H | -3.291399  | -2.429376 | -2.565835 |

E(solv)= -4265.725301 A.U  
 Thermal correction= 1.207983

J

|    |           |           |           |
|----|-----------|-----------|-----------|
| Th | 0.553854  | -0.255675 | 0.738413  |
| N  | 1.943016  | 0.901647  | -0.548493 |
| C  | 2.592171  | 1.690180  | -1.353681 |
| N  | 3.999577  | 1.719441  | -1.472197 |
| C  | 4.739645  | 2.985754  | -1.678778 |
| C  | 4.887851  | 3.456589  | -3.130893 |
| C  | 3.560911  | 3.927442  | -3.720739 |
| C  | 2.451812  | 2.876114  | -3.580319 |
| N  | 1.957597  | 2.624486  | -2.207854 |
| C  | 4.818474  | 0.576764  | -1.147763 |
| C  | 5.618040  | 0.581670  | 0.027376  |
| C  | 6.536751  | -0.469741 | 0.229981  |
| C  | 6.685737  | -1.523386 | -0.689065 |
| C  | 5.857204  | -1.517829 | -1.828781 |
| C  | 4.921999  | -0.496212 | -2.076124 |
| C  | 4.060797  | -0.549839 | -3.315479 |
| C  | 7.664636  | -2.650137 | -0.444651 |
| C  | 5.531193  | 1.691766  | 1.051299  |
| H  | 4.244536  | 0.321236  | -3.979382 |
| H  | 2.978709  | -0.544192 | -3.063885 |
| H  | 4.267599  | -1.467354 | -3.900347 |
| H  | 5.941101  | -2.339690 | -2.560243 |
| H  | 8.450449  | -2.361310 | 0.281983  |
| H  | 8.163733  | -2.968641 | -1.383276 |
| H  | 7.149180  | -3.546304 | -0.033472 |
| H  | 7.156890  | -0.458617 | 1.142761  |
| H  | 6.260265  | 2.507356  | 0.846944  |
| H  | 5.759483  | 1.308757  | 2.065436  |
| H  | 4.523998  | 2.150432  | 1.073347  |
| H  | 4.263127  | 3.788151  | -1.076338 |
| H  | 5.749863  | 2.828571  | -1.257644 |
| H  | 5.635122  | 4.280072  | -3.154754 |
| H  | 5.314097  | 2.629484  | -3.741097 |
| H  | 3.679853  | 4.164343  | -4.800917 |
| H  | 3.231745  | 4.869471  | -3.227874 |
| H  | 2.786092  | 1.915372  | -4.026935 |
| H  | 1.581362  | 3.212383  | -4.171276 |
| C  | 0.666962  | 3.184444  | -1.889001 |
| C  | -0.484734 | 2.852209  | -2.657051 |
| H  | -2.576257 | 3.286297  | -3.008336 |
| C  | -1.689760 | 3.546600  | -2.405321 |
| C  | -1.798512 | 4.547816  | -1.425322 |
| C  | -0.646903 | 4.844091  | -0.668230 |
| C  | 0.579922  | 4.188474  | -0.880651 |
| C  | -0.468016 | 1.810498  | -3.751791 |
| C  | -3.102448 | 5.271009  | -1.172661 |
| C  | 1.788105  | 4.595551  | -0.071790 |
| H  | 1.521857  | 5.362892  | 0.680935  |
| H  | 2.583156  | 5.023767  | -0.718337 |
| H  | 2.232674  | 3.731799  | 0.464541  |
| H  | -0.101969 | 2.228572  | -4.715981 |
| H  | 0.157575  | 0.931707  | -3.503302 |
| H  | -1.492473 | 1.437437  | -3.942801 |
| H  | -0.696790 | 5.628796  | 0.105404  |
| H  | -3.840390 | 5.077472  | -1.976473 |
| H  | -2.951753 | 6.368742  | -1.100883 |
| H  | -3.562442 | 4.946711  | -0.213589 |
| N  | 0.308607  | 1.227165  | 2.577176  |
| Si | -1.095380 | 2.246611  | 2.925943  |
| Si | 1.744173  | 1.282967  | 3.611648  |
| C  | -2.069326 | 1.721847  | 4.478885  |
| C  | -0.671755 | 4.085653  | 3.179574  |
| C  | -2.276363 | 2.118535  | 1.442405  |
| C  | 1.403833  | 0.904760  | 5.444972  |



|    |           |           |           |
|----|-----------|-----------|-----------|
| C  | 2.675113  | 2.943891  | 3.576104  |
| C  | 2.952558  | -0.039978 | 2.956105  |
| H  | 3.233954  | 0.117157  | 1.888469  |
| H  | 2.564394  | -1.072557 | 3.072979  |
| H  | 3.903800  | 0.023279  | 3.525320  |
| H  | 0.833811  | -0.037078 | 5.581246  |
| H  | 2.363800  | 0.804831  | 5.996391  |
| H  | 0.829433  | 1.721973  | 5.929687  |
| H  | 3.642957  | 2.841158  | 4.113160  |
| H  | 2.103942  | 3.755477  | 4.070577  |
| H  | 2.893823  | 3.270067  | 2.538983  |
| H  | -3.194213 | 2.716250  | 1.625410  |
| H  | -1.815153 | 2.507308  | 0.509587  |
| H  | -2.614141 | 1.074981  | 1.269344  |
| H  | -2.419777 | 0.671017  | 4.429819  |
| H  | -1.463993 | 1.830865  | 5.402113  |
| H  | -2.966097 | 2.369852  | 4.591418  |
| H  | -0.018179 | 4.471486  | 2.371962  |
| H  | -1.605976 | 4.688100  | 3.183987  |
| H  | -0.161494 | 4.263675  | 4.149449  |
| N  | 0.786550  | -2.396630 | 1.650066  |
| Si | -0.509153 | -2.942908 | 2.727468  |
| Si | 2.022826  | -3.562881 | 1.126815  |
| C  | -1.922177 | -1.671302 | 2.601380  |
| C  | -1.269698 | -4.618586 | 2.254904  |
| C  | 0.029524  | -3.030960 | 4.550033  |
| C  | 1.324480  | -4.941940 | 0.021066  |
| C  | 3.316861  | -2.642652 | 0.094009  |
| C  | 2.930635  | -4.370442 | 2.596981  |
| H  | -2.377570 | -1.670082 | 1.589832  |
| H  | -2.729050 | -1.932741 | 3.317957  |
| H  | -1.597526 | -0.642135 | 2.865741  |
| H  | -2.172093 | -4.800667 | 2.878175  |
| H  | -1.575097 | -4.622872 | 1.188397  |
| H  | -0.574904 | -5.467681 | 2.421121  |
| H  | 0.826516  | -3.786817 | 4.706715  |
| H  | -0.829149 | -3.307861 | 5.199391  |
| H  | 0.420628  | -2.053937 | 4.902163  |
| H  | 0.833099  | -5.750100 | 0.598919  |
| H  | 0.571847  | -4.515131 | -0.674794 |
| H  | 2.141367  | -5.404397 | -0.574512 |
| H  | 2.261153  | -5.018616 | 3.201262  |
| H  | 3.375819  | -3.613225 | 3.276296  |
| H  | 3.756036  | -5.013480 | 2.220624  |
| H  | 4.068822  | -3.370853 | -0.275423 |
| H  | 3.870184  | -1.862259 | 0.654575  |
| H  | 2.872520  | -2.166078 | -0.804839 |
| O  | -1.245254 | -0.648687 | -0.851932 |
| C  | -2.467559 | -0.099487 | -1.369917 |
| H  | -2.475791 | -0.255571 | -2.468021 |
| H  | -2.478837 | 0.993836  | -1.184041 |
| C  | -3.698606 | -0.766114 | -0.752443 |
| H  | -3.604139 | -1.868714 | -0.846671 |
| H  | -3.797532 | -0.522073 | 0.328092  |
| O  | -4.841699 | -0.301373 | -1.475854 |
| B  | -6.067830 | -0.244163 | -0.879798 |
| O  | -7.175911 | 0.244558  | -1.545742 |
| C  | -8.330925 | -0.060027 | -0.711761 |
| C  | -7.680395 | -0.209231 | 0.734797  |
| O  | -6.326692 | -0.652630 | 0.419088  |
| C  | -8.340365 | -1.255052 | 1.636247  |
| C  | -7.551243 | 1.130616  | 1.478904  |
| H  | -8.533593 | 1.508428  | 1.827768  |
| H  | -7.085902 | 1.905065  | 0.836131  |

|   |            |           |           |
|---|------------|-----------|-----------|
| H | -6.900973  | 0.986966  | 2.365235  |
| C | -9.345270  | 1.078578  | -0.846583 |
| C | -8.934227  | -1.374383 | -1.237324 |
| H | -9.872697  | -1.640409 | -0.709953 |
| H | -9.161997  | -1.256721 | -2.315835 |
| H | -8.221334  | -2.217231 | -1.131796 |
| H | -9.732469  | 1.112413  | -1.885108 |
| H | -10.207598 | 0.925085  | -0.165256 |
| H | -8.889041  | 2.062040  | -0.625380 |
| H | -9.400002  | -0.993673 | 1.836882  |
| H | -8.303862  | -2.264832 | 1.185821  |
| H | -7.810185  | -1.299138 | 2.609284  |
| H | 0.575212   | -1.801429 | -1.090366 |
| B | -0.552915  | -1.756887 | -1.698081 |
| O | -1.226348  | -3.038447 | -1.666000 |
| C | -1.502536  | -3.475922 | -3.013092 |
| C | -0.544256  | -2.550151 | -3.888110 |
| O | -0.429367  | -1.363772 | -3.083375 |
| C | -2.997785  | -3.251786 | -3.319313 |
| C | -1.204993  | -4.979266 | -3.123666 |
| C | -1.107488  | -2.163576 | -5.261668 |
| C | 0.863815   | -3.157063 | -4.065223 |
| H | 1.528743   | -2.387784 | -4.507897 |
| H | 1.296957   | -3.461435 | -3.091370 |
| H | 0.861966   | -4.039225 | -4.737867 |
| H | -0.381045  | -1.518259 | -5.797540 |
| H | -1.288398  | -3.061936 | -5.888084 |
| H | -2.056305  | -1.601194 | -5.170273 |
| H | -1.348113  | -5.339476 | -4.164378 |
| H | -0.174400  | -5.222686 | -2.804562 |
| H | -1.900545  | -5.545835 | -2.470866 |
| H | -3.285293  | -3.668528 | -4.306901 |
| H | -3.602594  | -3.768619 | -2.546096 |
| H | -3.274724  | -2.179504 | -3.307350 |

E(solv)= -4265.737884 A.U  
 Thermal correction= 1.209721

BpinOROBpin

|   |           |           |           |
|---|-----------|-----------|-----------|
| C | 0.287289  | -1.080645 | -0.041054 |
| O | 1.314381  | -1.020706 | -1.073539 |
| B | 0.716681  | -0.473668 | -2.192498 |
| O | -0.544598 | 0.050932  | -1.957078 |
| C | -0.735768 | 0.045658  | -0.510871 |
| O | 1.335721  | -0.475709 | -3.409023 |
| C | -0.359499 | 1.447792  | -0.003075 |
| C | -2.207047 | -0.250335 | -0.212412 |
| C | 0.945067  | -0.829288 | 1.317772  |
| C | -0.316275 | -2.494906 | -0.087820 |
| H | -0.551035 | 1.560318  | 1.083217  |
| H | 0.709602  | 1.671863  | -0.194014 |
| H | -0.968446 | 2.200884  | -0.542646 |
| H | -2.379778 | -0.338805 | 0.880110  |
| H | -2.840034 | 0.577313  | -0.592005 |
| H | -2.543753 | -1.184131 | -0.701020 |
| H | -1.051724 | -2.660165 | 0.725432  |
| H | -0.817115 | -2.686890 | -1.058357 |
| H | 0.500337  | -3.235991 | 0.024902  |
| H | 0.186069  | -0.794705 | 2.126568  |
| H | 1.651255  | -1.652751 | 1.547596  |
| H | 1.517628  | 0.117390  | 1.327475  |
| C | 0.729024  | 0.164339  | -4.530406 |
| C | 1.271641  | 1.589705  | -4.687392 |

|   |           |           |            |
|---|-----------|-----------|------------|
| H | 0.987610  | -0.428594 | -5.434003  |
| H | -0.377912 | 0.194411  | -4.433992  |
| O | 0.664790  | 2.229539  | -5.808843  |
| H | 1.013080  | 2.182701  | -3.783826  |
| H | 2.378559  | 1.559677  | -4.783938  |
| B | 1.284754  | 2.229272  | -7.024896  |
| O | 0.687129  | 2.776274  | -8.143888  |
| C | 1.714704  | 2.837892  | -9.175783  |
| C | 2.738896  | 1.712666  | -8.705868  |
| O | 2.546844  | 1.706416  | -7.259819  |
| C | 2.316401  | 4.252923  | -9.128160  |
| C | 1.057987  | 2.586205  | -10.535064 |
| C | 4.209964  | 2.010712  | -9.003317  |
| C | 2.364781  | 0.310291  | -9.214603  |
| H | 4.843800  | 1.183601  | -8.623973  |
| H | 4.383162  | 2.100157  | -10.095686 |
| H | 4.545220  | 2.944597  | -8.513887  |
| H | 2.974201  | -0.442266 | -8.674814  |
| H | 1.295801  | 0.084762  | -9.024705  |
| H | 2.557423  | 0.198430  | -10.300775 |
| H | 1.817491  | 2.552617  | -11.343429 |
| H | 0.486463  | 1.638905  | -10.545334 |
| H | 0.351062  | 3.408972  | -10.765096 |
| H | 3.051970  | 4.419504  | -9.941039  |
| H | 1.498847  | 4.992959  | -9.240959  |
| H | 2.816557  | 4.445209  | -8.157333  |

E(solv)= -1051.667738 A.U  
 Thermal correction= 0.359779

TS-H'

|    |           |          |           |
|----|-----------|----------|-----------|
| Th | 2.208345  | 4.364397 | 6.570466  |
| Si | 0.832946  | 1.270997 | 6.629548  |
| Si | -1.342319 | 3.479166 | 6.219909  |
| Si | 3.088268  | 3.845873 | 9.950987  |
| Si | 5.503809  | 4.255267 | 8.096596  |
| N  | 2.972774  | 4.879467 | 4.570005  |
| N  | 3.761633  | 6.621209 | 3.143262  |
| N  | 3.282030  | 4.520739 | 2.228348  |
| N  | 0.339434  | 2.957661 | 6.465031  |
| N  | 3.741093  | 4.117055 | 8.311978  |
| C  | 3.320510  | 5.310866 | 3.389342  |
| C  | 3.305511  | 7.366634 | 1.947507  |
| H  | 3.312321  | 8.438555 | 2.225054  |
| H  | 2.247355  | 7.096828 | 1.739219  |
| C  | 4.146182  | 7.170208 | 0.678568  |
| H  | 5.208587  | 7.404900 | 0.909315  |
| H  | 3.819612  | 7.917016 | -0.077852 |
| C  | 4.027744  | 5.755867 | 0.108905  |
| H  | 3.016695  | 5.595895 | -0.326625 |
| H  | 4.750247  | 5.618441 | -0.725198 |
| C  | 4.298737  | 4.667087 | 1.158486  |
| H  | 4.349457  | 3.686852 | 0.646051  |
| H  | 5.292498  | 4.841887 | 1.624307  |
| C  | 4.382136  | 7.404910 | 4.186623  |
| C  | 3.605867  | 8.324965 | 4.939446  |
| C  | 4.262391  | 9.172106 | 5.856263  |
| H  | 3.651399  | 9.884394 | 6.432762  |
| C  | 5.658264  | 9.136136 | 6.043532  |
| C  | 6.396435  | 8.194328 | 5.300176  |
| H  | 7.489713  | 8.138298 | 5.437076  |
| C  | 5.789047  | 7.327551 | 4.369707  |
| C  | 2.110287  | 8.445683 | 4.759226  |

|   |           |           |           |
|---|-----------|-----------|-----------|
| H | 1.857681  | 9.185719  | 3.967669  |
| H | 1.646816  | 8.808002  | 5.697117  |
| H | 1.652911  | 7.479916  | 4.467877  |
| C | 6.341885  | 10.093282 | 6.994812  |
| H | 6.392848  | 11.115697 | 6.560628  |
| H | 7.379714  | 9.774633  | 7.218587  |
| H | 5.795737  | 10.185101 | 7.956671  |
| C | 6.651557  | 6.380598  | 3.564860  |
| H | 6.284387  | 5.335040  | 3.612299  |
| H | 7.694125  | 6.386416  | 3.939448  |
| H | 6.682942  | 6.665799  | 2.491448  |
| C | 2.474167  | 3.325597  | 2.153560  |
| C | 3.073986  | 2.053536  | 2.360334  |
| C | 2.317190  | 0.896290  | 2.090173  |
| H | 2.790508  | -0.090225 | 2.233763  |
| C | 0.984089  | 0.960593  | 1.636478  |
| C | 0.401768  | 2.234374  | 1.492627  |
| H | -0.643598 | 2.311479  | 1.148828  |
| C | 1.120701  | 3.422750  | 1.737036  |
| C | 4.507104  | 1.928169  | 2.827541  |
| H | 5.227823  | 1.987373  | 1.982163  |
| H | 4.678119  | 0.952201  | 3.324101  |
| H | 4.772187  | 2.735396  | 3.539058  |
| C | 0.459885  | 4.762004  | 1.503057  |
| H | 0.577279  | 5.438954  | 2.373636  |
| H | -0.624392 | 4.640821  | 1.311756  |
| H | 0.896359  | 5.284301  | 0.625170  |
| C | 0.320664  | 0.488411  | 8.282818  |
| H | 0.680195  | 1.069228  | 9.156398  |
| H | -0.786512 | 0.430924  | 8.354670  |
| C | 2.751228  | 1.318305  | 6.504577  |
| H | 3.084364  | 1.718575  | 5.517506  |
| H | 3.141937  | 0.279992  | 6.548241  |
| H | 3.282256  | 1.864061  | 7.319464  |
| C | 0.275659  | 0.108836  | 5.240270  |
| H | -0.804404 | -0.131287 | 5.298432  |
| H | 0.837055  | -0.848083 | 5.312051  |
| H | 0.485147  | 0.558194  | 4.248756  |
| C | -1.381904 | 4.885111  | 4.938810  |
| H | -0.667790 | 5.704766  | 5.162524  |
| C | -2.119063 | 4.076492  | 7.849754  |
| H | -1.543747 | 4.900502  | 8.318892  |
| H | -2.172181 | 3.249178  | 8.589147  |
| H | -3.154593 | 4.442605  | 7.680842  |
| C | -2.490215 | 2.116505  | 5.548956  |
| H | -2.158596 | 1.735378  | 4.561437  |
| H | -3.507499 | 2.546441  | 5.420562  |
| H | -2.585702 | 1.253308  | 6.240752  |
| C | 6.505593  | 3.038217  | 9.165195  |
| H | 6.386421  | 3.216572  | 10.253718 |
| H | 7.585803  | 3.155095  | 8.929470  |
| H | 6.229498  | 1.983379  | 8.956811  |
| C | 6.098017  | 6.016782  | 8.465438  |
| H | 5.638134  | 6.744211  | 7.764137  |
| H | 7.201386  | 6.097916  | 8.359293  |
| H | 5.828164  | 6.326076  | 9.495944  |
| C | 5.912128  | 3.821740  | 6.288529  |
| H | 5.724420  | 2.746836  | 6.081028  |
| H | 6.985793  | 4.019663  | 6.084540  |
| H | 5.321888  | 4.420976  | 5.562312  |
| C | 3.334939  | 2.047774  | 10.532886 |
| H | 2.916204  | 1.311622  | 9.815903  |
| H | 2.824515  | 1.893134  | 11.508255 |
| H | 4.406838  | 1.802941  | 10.677208 |

|   |           |           |           |
|---|-----------|-----------|-----------|
| C | 1.207385  | 4.163360  | 9.892436  |
| H | 0.978352  | 5.246237  | 9.826405  |
| H | 0.754375  | 3.792544  | 10.836622 |
| H | 0.666746  | 3.642347  | 9.070179  |
| C | 3.817946  | 4.987248  | 11.274342 |
| H | 4.899877  | 4.802850  | 11.440290 |
| H | 3.304608  | 4.797997  | 12.242240 |
| H | 3.690017  | 6.062814  | 11.032636 |
| C | 0.206887  | -0.300856 | 1.331511  |
| H | -0.736537 | -0.080604 | 0.793480  |
| H | 0.800747  | -1.002363 | 0.709040  |
| H | -0.059784 | -0.844268 | 2.264296  |
| H | -2.394920 | 5.337059  | 4.879774  |
| H | -1.130104 | 4.485096  | 3.934956  |
| H | 0.712491  | -0.547651 | 8.373285  |
| O | 0.952603  | 6.210705  | 7.190483  |
| C | 0.172495  | 7.170298  | 7.527903  |
| O | 1.238545  | 8.778177  | 8.138616  |
| H | -0.351364 | 7.744690  | 6.733072  |
| H | -0.348669 | 7.119875  | 8.511078  |
| C | 1.868906  | 8.320047  | 9.336155  |
| C | 3.092650  | 9.176419  | 9.661056  |
| H | 1.168069  | 8.342309  | 10.201992 |
| H | 2.223702  | 7.277845  | 9.179761  |
| O | 3.744923  | 8.605865  | 10.804335 |
| H | 3.784444  | 9.175438  | 8.790251  |
| H | 2.769007  | 10.216281 | 9.864958  |
| B | 4.645712  | 9.349122  | 11.509613 |
| O | 5.062530  | 10.621750 | 11.148326 |
| C | 5.838664  | 11.142010 | 12.269612 |
| C | 6.300091  | 9.806765  | 13.009046 |
| O | 5.238922  | 8.872044  | 12.663809 |
| C | 4.885158  | 12.000090 | 13.117545 |
| C | 6.978202  | 12.002652 | 11.718733 |
| C | 6.380546  | 9.909724  | 14.534514 |
| C | 7.611128  | 9.231121  | 12.446381 |
| H | 7.632664  | 12.364818 | 12.538464 |
| H | 7.598922  | 11.446393 | 10.991061 |
| H | 6.559517  | 12.888838 | 11.199886 |
| H | 7.758128  | 8.210668  | 12.853900 |
| H | 7.574148  | 9.152649  | 11.340962 |
| H | 8.489274  | 9.847840  | 12.725771 |
| H | 6.665098  | 8.925404  | 14.958602 |
| H | 7.147396  | 10.649907 | 14.843709 |
| H | 5.409109  | 10.198965 | 14.977979 |
| H | 5.412074  | 12.496055 | 13.957672 |
| H | 4.438966  | 12.785112 | 12.474731 |
| H | 4.057256  | 11.390687 | 13.533014 |
| C | 0.255977  | 12.071734 | 9.163971  |
| C | 0.592682  | 12.090182 | 7.606291  |
| C | -0.143295 | 13.175786 | 6.804776  |
| H | 0.126478  | 14.195295 | 7.153736  |
| H | 0.133240  | 13.098354 | 5.732500  |
| H | -1.240886 | 13.053370 | 6.875081  |
| C | 2.107619  | 12.204737 | 7.325341  |
| H | 2.284750  | 11.985990 | 6.252208  |
| H | 2.506713  | 13.218255 | 7.540783  |
| H | 2.683479  | 11.469541 | 7.921159  |
| C | 1.226290  | 12.878789 | 10.039701 |
| H | 1.224051  | 13.953432 | 9.759006  |
| H | 0.919335  | 12.805278 | 11.103790 |
| H | 2.264312  | 12.500479 | 9.963259  |
| C | -1.191526 | 12.525708 | 9.456708  |
| H | -1.421171 | 12.314071 | 10.521174 |

|   |           |           |          |
|---|-----------|-----------|----------|
| H | -1.342327 | 13.610268 | 9.275275 |
| H | -1.913649 | 11.958433 | 8.835524 |
| B | 0.063241  | 9.910148  | 8.303637 |
| H | -0.979242 | 9.231713  | 8.319433 |
| O | 0.125813  | 10.809439 | 7.170595 |
| O | 0.364525  | 10.682704 | 9.497329 |

E(solv)= -4380.201213A.U

Thermal correction= 1.227949

H'

|    |           |           |           |
|----|-----------|-----------|-----------|
| Th | -0.501406 | -1.509880 | -0.297661 |
| Si | -1.937046 | -4.589241 | -0.210496 |
| Si | -4.071329 | -2.348677 | -0.566280 |
| Si | 0.406294  | -1.987595 | 3.050081  |
| Si | 2.831089  | -1.820024 | 1.180272  |
| N  | 0.273664  | -1.140407 | -2.347260 |
| N  | 1.165826  | 0.536521  | -3.794402 |
| N  | 0.570321  | -1.557455 | -4.672801 |
| N  | -2.403279 | -2.904875 | -0.376943 |
| N  | 1.080163  | -1.808629 | 1.422762  |
| C  | 0.640986  | -0.748069 | -3.522481 |
| C  | 0.725349  | 1.292611  | -4.985673 |
| H  | 0.804219  | 2.366788  | -4.726838 |
| H  | -0.352168 | 1.087464  | -5.171393 |
| C  | 1.526391  | 1.031529  | -6.269602 |
| H  | 2.603063  | 1.225352  | -6.067758 |
| H  | 1.214075  | 1.774872  | -7.035951 |
| C  | 1.338468  | -0.388290 | -6.807900 |
| H  | 0.311806  | -0.514526 | -7.217443 |
| H  | 2.035971  | -0.568614 | -7.655267 |
| C  | 1.585720  | -1.467726 | -5.743083 |
| H  | 1.606420  | -2.456970 | -6.240488 |
| H  | 2.586709  | -1.314008 | -5.285450 |
| C  | 1.796559  | 1.300677  | -2.744163 |
| C  | 1.048055  | 2.241696  | -1.987219 |
| C  | 1.722072  | 3.034129  | -1.034912 |
| H  | 1.127699  | 3.745246  | -0.439839 |
| C  | 3.110319  | 2.934208  | -0.823250 |
| C  | 3.826230  | 1.994623  | -1.589819 |
| H  | 4.915973  | 1.899861  | -1.446337 |
| C  | 3.197923  | 1.171421  | -2.544882 |
| C  | -0.432027 | 2.442184  | -2.212890 |
| H  | -0.622145 | 3.112770  | -3.080506 |
| H  | -0.903532 | 2.901255  | -1.324996 |
| H  | -0.940602 | 1.480360  | -2.419428 |
| C  | 3.805230  | 3.782978  | 0.218260  |
| H  | 3.706866  | 3.331923  | 1.230446  |
| H  | 3.373031  | 4.803415  | 0.271306  |
| H  | 4.890271  | 3.879410  | 0.010663  |
| C  | 4.032858  | 0.206576  | -3.356876 |
| H  | 3.648112  | -0.831832 | -3.292782 |
| H  | 5.081813  | 0.198337  | -3.000347 |
| H  | 4.045724  | 0.480958  | -4.433013 |
| C  | -0.292283 | -2.712793 | -4.723626 |
| C  | 0.250053  | -4.012630 | -4.528287 |
| C  | -0.566567 | -5.132423 | -4.781054 |
| H  | -0.138634 | -6.140363 | -4.643130 |
| C  | -1.906005 | -5.005002 | -5.200726 |
| C  | -2.431315 | -3.705119 | -5.328451 |
| H  | -3.481593 | -3.577815 | -5.641321 |
| C  | -1.650666 | -2.552750 | -5.102917 |
| C  | 1.682170  | -4.207039 | -4.082108 |

|   |           |           |           |
|---|-----------|-----------|-----------|
| H | 2.394025  | -4.187558 | -4.936973 |
| H | 1.810030  | -5.187625 | -3.581689 |
| H | 1.995212  | -3.410783 | -3.377678 |
| C | -2.253869 | -1.182831 | -5.313156 |
| H | -2.128438 | -0.536281 | -4.420495 |
| H | -3.338014 | -1.256788 | -5.528099 |
| H | -1.777954 | -0.654110 | -6.166333 |
| C | -2.467195 | -5.349766 | 1.450754  |
| H | -2.125851 | -4.745714 | 2.316011  |
| H | -3.575515 | -5.408710 | 1.505310  |
| C | -0.020973 | -4.594050 | -0.344434 |
| H | 0.308543  | -4.215514 | -1.340192 |
| H | 0.351686  | -5.637761 | -0.277775 |
| H | 0.520728  | -4.033561 | 0.452464  |
| C | -2.531859 | -5.750620 | -1.587204 |
| H | -3.618716 | -5.956564 | -1.523492 |
| H | -1.999317 | -6.723820 | -1.511912 |
| H | -2.314128 | -5.314752 | -2.583062 |
| C | -4.151931 | -0.986354 | -1.892799 |
| H | -3.409414 | -0.180068 | -1.720084 |
| C | -4.786663 | -1.707065 | 1.077808  |
| H | -4.166438 | -0.906899 | 1.526898  |
| H | -4.849779 | -2.531180 | 1.820584  |
| H | -5.813355 | -1.305574 | 0.933796  |
| C | -5.279709 | -3.705552 | -1.147388 |
| H | -5.006134 | -4.113748 | -2.142080 |
| H | -6.296480 | -3.263495 | -1.233498 |
| H | -5.351575 | -4.553576 | -0.433730 |
| C | 3.736238  | -3.110378 | 2.251910  |
| H | 3.647609  | -2.903409 | 3.338787  |
| H | 4.820007  | -3.105667 | 2.003380  |
| H | 3.353925  | -4.136057 | 2.066116  |
| C | 3.589206  | -0.115475 | 1.536381  |
| H | 3.221290  | 0.633052  | 0.803816  |
| H | 4.697985  | -0.142789 | 1.461293  |
| H | 3.322255  | 0.242429  | 2.552027  |
| C | 3.200594  | -2.284720 | -0.628983 |
| H | 2.934358  | -3.343471 | -0.833170 |
| H | 4.284371  | -2.163086 | -0.840398 |
| H | 2.643800  | -1.647474 | -1.348913 |
| C | 0.508745  | -3.783326 | 3.683319  |
| H | 0.074630  | -4.504604 | 2.960426  |
| H | -0.050399 | -3.889073 | 4.638473  |
| H | 1.556255  | -4.092875 | 3.875621  |
| C | -1.443780 | -1.528082 | 2.984917  |
| H | -1.599272 | -0.444732 | 2.809228  |
| H | -1.910545 | -1.783783 | 3.960097  |
| H | -2.025638 | -2.079898 | 2.212378  |
| C | 1.228085  | -0.879214 | 4.351834  |
| H | 2.291812  | -1.150931 | 4.517736  |
| H | 0.707273  | -0.998243 | 5.327015  |
| H | 1.197344  | 0.196490  | 4.083287  |
| C | -2.750606 | -6.228664 | -5.478992 |
| H | -2.218060 | -6.949046 | -6.134862 |
| H | -2.996171 | -6.768470 | -4.538372 |
| H | -3.707963 | -5.962469 | -5.969813 |
| H | -5.159005 | -0.518482 | -1.926151 |
| H | -3.949364 | -1.428896 | -2.890196 |
| H | -2.073612 | -6.381872 | 1.574215  |
| O | -1.639529 | 0.317812  | 0.237690  |
| C | -2.660802 | 1.249424  | 0.516083  |
| H | -2.731155 | 2.034477  | -0.263146 |
| H | -3.653554 | 0.754962  | 0.592954  |
| H | -2.496561 | 1.756985  | 1.495012  |

E(solv)= -3328.620776 A.U  
Thermal correction= 0.852924

TS-I'

|    |           |           |           |
|----|-----------|-----------|-----------|
| Th | 0.464524  | -1.004249 | 0.276107  |
| N  | -1.117206 | -2.545714 | -0.082574 |
| C  | -2.082599 | -3.320294 | -0.464791 |
| N  | -2.622686 | -3.310066 | -1.777570 |
| C  | -4.083691 | -3.397482 | -1.991136 |
| C  | -4.659277 | -4.816536 | -2.098436 |
| C  | -4.607747 | -5.571378 | -0.771385 |
| C  | -3.204000 | -5.569345 | -0.150745 |
| N  | -2.720853 | -4.268087 | 0.366564  |
| C  | -2.651060 | -4.177253 | 1.804976  |
| C  | -3.566873 | -3.340727 | 2.500472  |
| C  | -3.606274 | -3.405519 | 3.906011  |
| C  | -2.762922 | -4.257511 | 4.646690  |
| C  | -1.842772 | -5.047229 | 3.934409  |
| C  | -1.767580 | -5.025355 | 2.525924  |
| C  | -0.780241 | -5.928358 | 1.819407  |
| C  | -4.494481 | -2.404461 | 1.762740  |
| C  | -2.819164 | -4.283687 | 6.157895  |
| H  | -5.113546 | -2.945497 | 1.017053  |
| H  | -5.181455 | -1.895128 | 2.467162  |
| H  | -3.936702 | -1.620412 | 1.206668  |
| H  | -0.462011 | -5.504007 | 0.847381  |
| H  | 0.122132  | -6.089644 | 2.441684  |
| H  | -1.211634 | -6.933310 | 1.613438  |
| H  | -1.157311 | -5.710652 | 4.489382  |
| H  | -4.328869 | -2.765851 | 4.440957  |
| H  | -3.862363 | -4.211004 | 6.529313  |
| H  | -2.260978 | -3.425740 | 6.594696  |
| H  | -2.370765 | -5.209976 | 6.570146  |
| C  | -1.831824 | -2.922372 | -2.917677 |
| C  | -0.863944 | -3.831419 | -3.437799 |
| C  | -0.223675 | -3.529372 | -4.653310 |
| C  | -0.496924 | -2.350530 | -5.376513 |
| C  | -1.418253 | -1.448750 | -4.819099 |
| C  | -2.087179 | -1.700956 | -3.600877 |
| C  | -3.056556 | -0.667077 | -3.077450 |
| H  | -2.759603 | 0.342327  | -3.424604 |
| H  | -3.101892 | -0.643983 | -1.971913 |
| H  | -4.091391 | -0.836139 | -3.452280 |
| H  | -1.628009 | -0.501700 | -5.345242 |
| C  | 0.194910  | -2.069167 | -6.691530 |
| H  | -0.146689 | -1.113703 | -7.137309 |
| H  | 1.297241  | -2.007952 | -6.564688 |
| H  | 0.003154  | -2.875949 | -7.431335 |
| H  | 0.505009  | -4.252520 | -5.056709 |
| C  | -0.533138 | -5.119371 | -2.723309 |
| H  | 0.242948  | -5.689916 | -3.270106 |
| H  | -0.155233 | -4.924926 | -1.697156 |
| H  | -1.425860 | -5.771961 | -2.623860 |
| N  | 1.127486  | 0.137905  | 2.255986  |
| Si | 2.233985  | 1.496934  | 1.981203  |
| Si | 0.499711  | -0.104799 | 3.896834  |
| C  | 1.406574  | 3.207573  | 2.067988  |
| C  | 3.730760  | 1.509251  | 3.161022  |
| C  | 2.962027  | 1.335007  | 0.224881  |
| C  | 1.767645  | -0.918506 | 5.069368  |
| C  | -0.072507 | 1.504810  | 4.741500  |
| C  | -1.013378 | -1.246979 | 3.841469  |



|    |           |           |           |
|----|-----------|-----------|-----------|
| H  | -1.884602 | -0.753822 | 3.365004  |
| H  | -0.841059 | -2.206584 | 3.309658  |
| H  | -1.311830 | -1.510594 | 4.877954  |
| H  | -0.594115 | 1.261334  | 5.692680  |
| H  | 0.771836  | 2.180625  | 4.990974  |
| H  | -0.778524 | 2.062386  | 4.091890  |
| H  | 2.068515  | -1.929707 | 4.725091  |
| H  | 2.689868  | -0.311806 | 5.173069  |
| H  | 1.323573  | -1.030739 | 6.082697  |
| H  | 1.218000  | 3.528822  | 3.112423  |
| H  | 2.060070  | 3.972815  | 1.595162  |
| H  | 0.430057  | 3.196106  | 1.541226  |
| H  | 3.434456  | 1.709626  | 4.211999  |
| H  | 4.280849  | 0.545312  | 3.139549  |
| H  | 4.438849  | 2.312380  | 2.861410  |
| H  | 3.713862  | 2.139130  | 0.077042  |
| H  | 3.473879  | 0.364105  | 0.070648  |
| H  | 2.213572  | 1.468036  | -0.585451 |
| N  | 2.380964  | -2.051327 | -0.648120 |
| Si | 3.030218  | -3.267177 | 0.455359  |
| Si | 3.082934  | -1.757679 | -2.245139 |
| C  | 1.964220  | -0.534187 | -3.176725 |
| C  | 3.239249  | -3.333454 | -3.303701 |
| C  | 4.833508  | -1.002590 | -2.198153 |
| C  | 4.759271  | -2.853903 | 1.132025  |
| C  | 3.090311  | -5.036619 | -0.243706 |
| C  | 1.840733  | -3.308728 | 1.950247  |
| H  | 4.057138  | -3.993399 | -2.947035 |
| H  | 3.472852  | -3.058207 | -4.355226 |
| H  | 2.298770  | -3.919213 | -3.304163 |
| H  | 2.352156  | -0.378916 | -4.205911 |
| H  | 1.944872  | 0.463940  | -2.691830 |
| H  | 0.918970  | -0.897644 | -3.275829 |
| H  | 5.562456  | -1.678435 | -1.703930 |
| H  | 5.193635  | -0.831765 | -3.236379 |
| H  | 4.863539  | -0.028285 | -1.669419 |
| H  | 5.533409  | -2.879872 | 0.336847  |
| H  | 5.058787  | -3.587154 | 1.911954  |
| H  | 4.777968  | -1.842888 | 1.589828  |
| H  | 3.863971  | -5.153328 | -1.029598 |
| H  | 3.332616  | -5.752753 | 0.571323  |
| H  | 2.115330  | -5.334204 | -0.682039 |
| H  | 2.139278  | -4.125291 | 2.640285  |
| H  | 0.782631  | -3.520529 | 1.669436  |
| H  | 1.883117  | -2.370077 | 2.542454  |
| H  | -4.302151 | -2.863099 | -2.933772 |
| H  | -4.601622 | -2.839595 | -1.181193 |
| H  | -4.097889 | -5.373506 | -2.881753 |
| H  | -5.709158 | -4.742748 | -2.458797 |
| H  | -4.921176 | -6.628672 | -0.917221 |
| H  | -5.326091 | -5.130352 | -0.044882 |
| H  | -2.473025 | -5.965333 | -0.887968 |
| H  | -3.199819 | -6.265768 | 0.709140  |
| O  | -0.431200 | 0.787941  | -0.754850 |
| C  | -0.319967 | 1.903821  | -1.602673 |
| B  | -2.069617 | 0.961658  | 0.617079  |
| H  | -1.615049 | -0.013111 | 1.201704  |
| O  | -3.300269 | 0.797764  | -0.016582 |
| C  | -3.990439 | 2.081469  | -0.051872 |
| C  | -3.170623 | 2.951355  | 1.011021  |
| O  | -1.893485 | 2.258687  | 1.093789  |
| C  | -5.457052 | 1.832853  | 0.326317  |
| C  | -2.919426 | 4.404545  | 0.593677  |
| C  | -3.931524 | 2.636623  | -1.484202 |

|   |           |          |           |
|---|-----------|----------|-----------|
| C | -3.782989 | 2.922684 | 2.423483  |
| H | -6.021460 | 2.786450 | 0.384796  |
| H | -5.937370 | 1.201696 | -0.448734 |
| H | -5.550648 | 1.307533 | 1.295117  |
| H | -2.367878 | 4.474365 | -0.363000 |
| H | -2.315094 | 4.914356 | 1.370974  |
| H | -3.874865 | 4.958873 | 0.487574  |
| H | -2.891994 | 2.810230 | -1.818768 |
| H | -4.492082 | 3.589493 | -1.571247 |
| H | -3.075852 | 3.401618 | 3.130149  |
| H | -4.744534 | 3.472956 | 2.470931  |
| H | -3.953790 | 1.884258 | 2.770712  |
| H | -4.395029 | 1.905835 | -2.176589 |
| H | -0.884603 | 1.750531 | -2.551013 |
| H | -0.708051 | 2.815552 | -1.094512 |
| H | 0.740573  | 2.107514 | -1.878021 |

E(solv)= -3740.481766 A.U  
 Thermal correction= 1.021476

CH<sub>3</sub>OBpin

|   |           |           |           |
|---|-----------|-----------|-----------|
| C | -1.718713 | 0.124679  | 1.587056  |
| O | -0.322103 | 0.446609  | 1.332082  |
| B | -0.086047 | 0.161372  | -0.000016 |
| O | -1.236094 | -0.116222 | -0.725322 |
| C | -2.363386 | 0.225901  | 0.134081  |
| O | 1.173233  | 0.164678  | -0.518409 |
| C | -2.792958 | 1.656324  | -0.232554 |
| C | -3.503133 | -0.758090 | -0.139565 |
| C | -2.270976 | 1.121503  | 2.609141  |
| C | -1.759388 | -1.302911 | 2.158892  |
| H | -3.699420 | 1.971593  | 0.322767  |
| H | -1.983139 | 2.384469  | -0.023979 |
| H | -3.018715 | 1.697465  | -1.317285 |
| H | -4.354667 | -0.580996 | 0.549501  |
| H | -3.871529 | -0.625594 | -1.177258 |
| H | -3.171841 | -1.808059 | -0.030143 |
| H | -2.785220 | -1.600994 | 2.456348  |
| H | -1.378868 | -2.041552 | 1.424439  |
| H | -1.108395 | -1.349389 | 3.054891  |
| H | -3.355054 | 0.957352  | 2.780427  |
| H | -1.748279 | 0.988825  | 3.578075  |
| H | -2.116993 | 2.168034  | 2.284532  |
| C | 1.395573  | -0.086033 | -1.900305 |
| H | 2.123515  | 0.657220  | -2.288482 |
| H | 1.831804  | -1.099585 | -2.038321 |
| H | 0.458482  | -0.019829 | -2.492585 |

E(solv)= -526.4297122 A.U  
 Thermal correction= 0.178899

### 13. References

1. Szewczyk, M.; Magre, M.; Zubar, V.; Rueping, M. Reduction of Cyclic and Linear Organic Carbonates Using a Readily Available Magnesium Catalyst. *ACS Catal.* **2019**, *9*, 11634–11639.

2. (a) Yang, Y.; Xu, M.; Song, D. Organocatalysts with Carbon-Centered Activity for CO<sub>2</sub> Reduction with Boranes. *Chem. Commun.* **2015**, *5*, 11293–11296. (b) Hojoh, K.; Shido, Y.; Ohmiya, H.; Sawamura, M. Construction of Quaternary Stereogenic Carbon Centers through Copper-Catalyzed Enantioselective Allylic Cross-Coupling with Alkylboranes. *Angew. Chem. Int. Ed.* **2014**, *53*, 4954–4958.
